# Supplementary material for: Antibody signatures of asymptomatic Plasmodium falciparum malaria infections measured from dried blood spots
Source: Malar J. 2021 Sep 23;20:378. doi: 10.1186/s12936-021-03915-8 (PMC8461960; doi:10.1186/s12936-021-03915-8)
Supplement: Supplementary file 1 — Additional file 1. Sample metadata and Pf250 signal for matched DBS and serum study. [file 12936_2021_3915_MOESM1_ESM.csv]

Sample_ID	Age	Sex	ID	GeneID	Description	serum_signal	DBS_signal
S01 001	84	F	PFA0510we1s3	PF3D7_0110500	bromodomain protein, putative	3723.166667	640
S01 002	54	F	PFA0510we1s3	PF3D7_0110500	bromodomain protein, putative	-1256.166667	-1339.166667
S01 003	50	F	PFA0510we1s3	PF3D7_0110500	bromodomain protein, putative	1078.333333	66
S01 004	24	F	PFA0510we1s3	PF3D7_0110500	bromodomain protein, putative	-520.833333	-638.5
S01 005	14	M	PFA0510we1s3	PF3D7_0110500	bromodomain protein, putative	-1874.5	406.833333
S01 006	13	M	PFA0510we1s3	PF3D7_0110500	bromodomain protein, putative	-77.5	-505
S01 007	65	F	PFA0510we1s3	PF3D7_0110500	bromodomain protein, putative	8634.833333	1888.166667
S01 008	70	F	PFA0510we1s3	PF3D7_0110500	bromodomain protein, putative	754.666667	-114.5
S01 009	45	M	PFA0510we1s3	PF3D7_0110500	bromodomain protein, putative	3602.166667	2125.5
S01 010	2	M	PFA0510we1s3	PF3D7_0110500	bromodomain protein, putative	-2064	-1288.833333
S01 011	68	F	PFA0510we1s3	PF3D7_0110500	bromodomain protein, putative	1268.666667	690.833333
S01 012	66	F	PFA0510we1s3	PF3D7_0110500	bromodomain protein, putative	10388.66667	3101.666667
S01 013	69	F	PFA0510we1s3	PF3D7_0110500	bromodomain protein, putative	-692.666667	-29.833333
S01 014	45	F	PFA0510we1s3	PF3D7_0110500	bromodomain protein, putative	-355	157.666667
S01 015	3	M	PFA0510we1s3	PF3D7_0110500	bromodomain protein, putative	-820.166667	-766.5
S01 016	32	F	PFA0510we1s3	PF3D7_0110500	bromodomain protein, putative	2660.333333	768.333333
S01 017	57	F	PFA0510we1s3	PF3D7_0110500	bromodomain protein, putative	555.833333	179.166667
S01 018	2	F	PFA0510we1s3	PF3D7_0110500	bromodomain protein, putative	252.833333	-625.666667
S01 019	10	F	PFA0510we1s3	PF3D7_0110500	bromodomain protein, putative	-31.166667	-151.833333
S01 020	68	F	PFA0510we1s3	PF3D7_0110500	bromodomain protein, putative	1889	2081.833333
S01 021	17	F	PFA0510we1s3	PF3D7_0110500	bromodomain protein, putative	-1287	358.833333
S01 022	56	F	PFA0510we1s3	PF3D7_0110500	bromodomain protein, putative	2651.833333	765.333333
S01 023	20	M	PFA0510we1s3	PF3D7_0110500	bromodomain protein, putative	1069.833333	-1211.833333
S01 024	15	M	PFA0510we1s3	PF3D7_0110500	bromodomain protein, putative	49.333333	445.5
S01 025	68	F	PFA0510we1s3	PF3D7_0110500	bromodomain protein, putative	10920.83333	1801
S01 026	13	F	PFA0510we1s3	PF3D7_0110500	bromodomain protein, putative	60.333333	-840.166667
S01 027	54	F	PFA0510we1s3	PF3D7_0110500	bromodomain protein, putative	1522	-308.666667
S01 028	19	F	PFA0510we1s3	PF3D7_0110500	bromodomain protein, putative	215.333333	-885.5
S01 029	67	F	PFA0510we1s3	PF3D7_0110500	bromodomain protein, putative	11837	5866.666667
S01 030	59	F	PFA0510we1s3	PF3D7_0110500	bromodomain protein, putative	4705.166667	1107.833333
S01 031	68	M	PFA0510we1s3	PF3D7_0110500	bromodomain protein, putative	1691.333333	-2107.333333
S01 032	63	M	PFA0510we1s3	PF3D7_0110500	bromodomain protein, putative	7916.833333	1128
S01 033	39	F	PFA0510we1s3	PF3D7_0110500	bromodomain protein, putative	-123.5	-111.166667
S01 034	36	F	PFA0510we1s3	PF3D7_0110500	bromodomain protein, putative	1073.333333	-1992.5
S01 035	31	F	PFA0510we1s3	PF3D7_0110500	bromodomain protein, putative	-3488.666667	1235.333333
S01 036	63	F	PFA0510we1s3	PF3D7_0110500	bromodomain protein, putative	-310	-470.333333
S01 037	48	F	PFA0510we1s3	PF3D7_0110500	bromodomain protein, putative	547.166667	-2144.5
S01 038	68	F	PFA0510we1s3	PF3D7_0110500	bromodomain protein, putative	1160.833333	42.166667
S01 039	52	F	PFA0510we1s3	PF3D7_0110500	bromodomain protein, putative	7231.5	-1082.833333
S01 040	35	F	PFA0510we1s3	PF3D7_0110500	bromodomain protein, putative	149	658.333333
S01 041	55	F	PFA0510we1s3	PF3D7_0110500	bromodomain protein, putative	295.666667	668.833333
S01 042	44	F	PFA0510we1s3	PF3D7_0110500	bromodomain protein, putative	-1744.333333	-525.166667
S01 043	69	F	PFA0510we1s3	PF3D7_0110500	bromodomain protein, putative	-1445.833333	730.666667
S01 044	34	M	PFA0510we1s3	PF3D7_0110500	bromodomain protein, putative	864.666667	-52.666667
S01 045	68	M	PFA0510we1s3	PF3D7_0110500	bromodomain protein, putative	685.5	3249.5
S01 046	56	M	PFA0510we1s3	PF3D7_0110500	bromodomain protein, putative	914.666667	810.5
S01 047	58	M	PFA0510we1s3	PF3D7_0110500	bromodomain protein, putative	8888.166667	1566.333333
S01 048	35	M	PFA0510we1s3	PF3D7_0110500	bromodomain protein, putative	-809.833333	-2397.833333
S01 049	59	M	PFA0510we1s3	PF3D7_0110500	bromodomain protein, putative	1266.833333	716.166667
S01 050	31	M	PFA0510we1s3	PF3D7_0110500	bromodomain protein, putative	8676.333333	9382.5
S01 051	23	F	PFA0510we1s3	PF3D7_0110500	bromodomain protein, putative	1371.333333	796.5
S01 052	2	F	PFA0510we1s3	PF3D7_0110500	bromodomain protein, putative	-909.833333	-1677.333333
S01 053	68	M	PFA0510we1s3	PF3D7_0110500	bromodomain protein, putative	210.333333	-58.666667
S01 054	73	M	PFA0510we1s3	PF3D7_0110500	bromodomain protein, putative	1578.5	695.5
S01 055	41	F	PFA0510we1s3	PF3D7_0110500	bromodomain protein, putative	696.333333	-40.333333
S01 056	56	F	PFA0510we1s3	PF3D7_0110500	bromodomain protein, putative	-212.666667	23.166667
S01 057	37	F	PFA0510we1s3	PF3D7_0110500	bromodomain protein, putative	710	314.333333
S01 058	48	F	PFA0510we1s3	PF3D7_0110500	bromodomain protein, putative	512.833333	-1021.5
S01 059	27	F	PFA0510we1s3	PF3D7_0110500	bromodomain protein, putative	1290	-302.166667
S01 060	16	F	PFA0510we1s3	PF3D7_0110500	bromodomain protein, putative	1207	157.333333
S01 061	47	F	PFA0510we1s3	PF3D7_0110500	bromodomain protein, putative	1002.5	-933.666667
S01 062	14	M	PFA0510we1s3	PF3D7_0110500	bromodomain protein, putative	73.333333	-1611.833333
S01 063	32	F	PFA0510we1s3	PF3D7_0110500	bromodomain protein, putative	1675.666667	-625.833333
S01 064	31	F	PFA0510we1s3	PF3D7_0110500	bromodomain protein, putative	350.833333	130.833333
S01 065	15	F	PFA0510we1s3	PF3D7_0110500	bromodomain protein, putative	1709.666667	-411
S01 066	60	F	PFA0510we1s3	PF3D7_0110500	bromodomain protein, putative	342.333333	589.833333
S01 067	25	F	PFA0510we1s3	PF3D7_0110500	bromodomain protein, putative	459	-17
S01 068	54	M	PFA0510we1s3	PF3D7_0110500	bromodomain protein, putative	7861.166667	2263.833333
S01 069	38	F	PFA0510we1s3	PF3D7_0110500	bromodomain protein, putative	2613.166667	-348.333333
S01 070	30	F	PFA0510we1s3	PF3D7_0110500	bromodomain protein, putative	2510.5	1608
S01 071	37	F	PFA0510we1s3	PF3D7_0110500	bromodomain protein, putative	-586.833333	-196.333333
S01 072	36	M	PFA0510we1s3	PF3D7_0110500	bromodomain protein, putative	2139.333333	600.166667
S01 073	48	M	PFA0510we1s3	PF3D7_0110500	bromodomain protein, putative	1709.5	-12.833333
S01 074	28	F	PFA0510we1s3	PF3D7_0110500	bromodomain protein, putative	2978	2270.166667
S01 075	56	F	PFA0510we1s3	PF3D7_0110500	bromodomain protein, putative	491.5	-1328.666667
S01 076	28	F	PFA0510we1s3	PF3D7_0110500	bromodomain protein, putative	1021	877.333333
S01 077	64	F	PFA0510we1s3	PF3D7_0110500	bromodomain protein, putative	1839.5	293.166667
S01 078	65	F	PFA0510we1s3	PF3D7_0110500	bromodomain protein, putative	6471.5	1263
S01 079	12	M	PFA0510we1s3	PF3D7_0110500	bromodomain protein, putative	-459.333333	159.5
S01 080	41	M	PFA0510we1s3	PF3D7_0110500	bromodomain protein, putative	1828.333333	305.5
S01 081	8	M	PFA0510we1s3	PF3D7_0110500	bromodomain protein, putative	626.5	-386.666667
S01 082	7	M	PFA0510we1s3	PF3D7_0110500	bromodomain protein, putative	213	1446
S01 083	7	M	PFA0510we1s3	PF3D7_0110500	bromodomain protein, putative	-235.166667	747.333333
S01 084	7	M	PFA0510we1s3	PF3D7_0110500	bromodomain protein, putative	493.833333	127.666667
S01 085	7	M	PFA0510we1s3	PF3D7_0110500	bromodomain protein, putative	1037.5	579.5
S01 086	8	F	PFA0510we1s3	PF3D7_0110500	bromodomain protein, putative	5541	1317.666667
S01 087	7	F	PFA0510we1s3	PF3D7_0110500	bromodomain protein, putative	671.5	-28.5
S01 088	8	M	PFA0510we1s3	PF3D7_0110500	bromodomain protein, putative	1486.666667	-609.166667
S01 089	11	M	PFA0510we1s3	PF3D7_0110500	bromodomain protein, putative	3873	-2383.333333
S01 090	9	M	PFA0510we1s3	PF3D7_0110500	bromodomain protein, putative	248	-369.833333
S01 091	8	M	PFA0510we1s3	PF3D7_0110500	bromodomain protein, putative	254.833333	483.833333
S01 092	8	F	PFA0510we1s3	PF3D7_0110500	bromodomain protein, putative	217.166667	401
S01 093	9	F	PFA0510we1s3	PF3D7_0110500	bromodomain protein, putative	2013.333333	-994.333333
S01 094	8	F	PFA0510we1s3	PF3D7_0110500	bromodomain protein, putative	137	-2665.5
S01 095	12	M	PFA0510we1s3	PF3D7_0110500	bromodomain protein, putative	803.166667	-909.666667
S01 096	12	F	PFA0510we1s3	PF3D7_0110500	bromodomain protein, putative	1593	-3257.666667
S01 097	12	F	PFA0510we1s3	PF3D7_0110500	bromodomain protein, putative	2524.833333	1465.333333
S01 098	10	F	PFA0510we1s3	PF3D7_0110500	bromodomain protein, putative	-839	289.5
S01 099	11	F	PFA0510we1s3	PF3D7_0110500	bromodomain protein, putative	3235	1305
S01 100	10	F	PFA0510we1s3	PF3D7_0110500	bromodomain protein, putative	2655.5	-765.166667
S01 001	84	F	MAL6P1.1_CIDR2	PF3D7_0632800	erythrocyte membrane protein 1, PfEMP1	4541.166667	158
S01 002	54	F	MAL6P1.1_CIDR2	PF3D7_0632800	erythrocyte membrane protein 1, PfEMP1	37.833333	-272.166667
S01 003	50	F	MAL6P1.1_CIDR2	PF3D7_0632800	erythrocyte membrane protein 1, PfEMP1	-803.666667	-71
S01 004	24	F	MAL6P1.1_CIDR2	PF3D7_0632800	erythrocyte membrane protein 1, PfEMP1	5105.166667	755.5
S01 005	14	M	MAL6P1.1_CIDR2	PF3D7_0632800	erythrocyte membrane protein 1, PfEMP1	532.5	-356.166667
S01 006	13	M	MAL6P1.1_CIDR2	PF3D7_0632800	erythrocyte membrane protein 1, PfEMP1	-216.5	198
S01 007	65	F	MAL6P1.1_CIDR2	PF3D7_0632800	erythrocyte membrane protein 1, PfEMP1	8472.833333	588.166667
S01 008	70	F	MAL6P1.1_CIDR2	PF3D7_0632800	erythrocyte membrane protein 1, PfEMP1	834.666667	114.5
S01 009	45	M	MAL6P1.1_CIDR2	PF3D7_0632800	erythrocyte membrane protein 1, PfEMP1	2860.166667	-323.5
S01 010	2	M	MAL6P1.1_CIDR2	PF3D7_0632800	erythrocyte membrane protein 1, PfEMP1	-279	653.166667
S01 011	68	F	MAL6P1.1_CIDR2	PF3D7_0632800	erythrocyte membrane protein 1, PfEMP1	2124.666667	401.833333
S01 012	66	F	MAL6P1.1_CIDR2	PF3D7_0632800	erythrocyte membrane protein 1, PfEMP1	2686.666667	575.666667
S01 013	69	F	MAL6P1.1_CIDR2	PF3D7_0632800	erythrocyte membrane protein 1, PfEMP1	-2841.666667	-23.833333
S01 014	45	F	MAL6P1.1_CIDR2	PF3D7_0632800	erythrocyte membrane protein 1, PfEMP1	-1070	-275.333333
S01 015	3	M	MAL6P1.1_CIDR2	PF3D7_0632800	erythrocyte membrane protein 1, PfEMP1	-1336.166667	-441.5
S01 016	32	F	MAL6P1.1_CIDR2	PF3D7_0632800	erythrocyte membrane protein 1, PfEMP1	4624.333333	37.333333
S01 017	57	F	MAL6P1.1_CIDR2	PF3D7_0632800	erythrocyte membrane protein 1, PfEMP1	1307.833333	31.166667
S01 018	2	F	MAL6P1.1_CIDR2	PF3D7_0632800	erythrocyte membrane protein 1, PfEMP1	-676.166667	-768.666667
S01 019	10	F	MAL6P1.1_CIDR2	PF3D7_0632800	erythrocyte membrane protein 1, PfEMP1	836.833333	-871.833333
S01 020	68	F	MAL6P1.1_CIDR2	PF3D7_0632800	erythrocyte membrane protein 1, PfEMP1	-554	211.833333
S01 021	17	F	MAL6P1.1_CIDR2	PF3D7_0632800	erythrocyte membrane protein 1, PfEMP1	975	-287.166667
S01 022	56	F	MAL6P1.1_CIDR2	PF3D7_0632800	erythrocyte membrane protein 1, PfEMP1	8479.833333	173.333333
S01 023	20	M	MAL6P1.1_CIDR2	PF3D7_0632800	erythrocyte membrane protein 1, PfEMP1	1155.833333	-2768.833333
S01 024	15	M	MAL6P1.1_CIDR2	PF3D7_0632800	erythrocyte membrane protein 1, PfEMP1	1942.333333	274.5
S01 025	68	F	MAL6P1.1_CIDR2	PF3D7_0632800	erythrocyte membrane protein 1, PfEMP1	-197.166667	-623
S01 026	13	F	MAL6P1.1_CIDR2	PF3D7_0632800	erythrocyte membrane protein 1, PfEMP1	132.333333	-154.166667
S01 027	54	F	MAL6P1.1_CIDR2	PF3D7_0632800	erythrocyte membrane protein 1, PfEMP1	199	47.333333
S01 028	19	F	MAL6P1.1_CIDR2	PF3D7_0632800	erythrocyte membrane protein 1, PfEMP1	3292.333333	281.5
S01 029	67	F	MAL6P1.1_CIDR2	PF3D7_0632800	erythrocyte membrane protein 1, PfEMP1	-55	1245.666667
S01 030	59	F	MAL6P1.1_CIDR2	PF3D7_0632800	erythrocyte membrane protein 1, PfEMP1	3748.166667	179.833333
S01 031	68	M	MAL6P1.1_CIDR2	PF3D7_0632800	erythrocyte membrane protein 1, PfEMP1	5403.333333	-1608.333333
S01 032	63	M	MAL6P1.1_CIDR2	PF3D7_0632800	erythrocyte membrane protein 1, PfEMP1	4624.833333	-4092
S01 033	39	F	MAL6P1.1_CIDR2	PF3D7_0632800	erythrocyte membrane protein 1, PfEMP1	2748.5	472.833333
S01 034	36	F	MAL6P1.1_CIDR2	PF3D7_0632800	erythrocyte membrane protein 1, PfEMP1	7428.333333	-466.5
S01 035	31	F	MAL6P1.1_CIDR2	PF3D7_0632800	erythrocyte membrane protein 1, PfEMP1	1055.333333	3372.333333
S01 036	63	F	MAL6P1.1_CIDR2	PF3D7_0632800	erythrocyte membrane protein 1, PfEMP1	-947	669.666667
S01 037	48	F	MAL6P1.1_CIDR2	PF3D7_0632800	erythrocyte membrane protein 1, PfEMP1	1071.166667	-681.5
S01 038	68	F	MAL6P1.1_CIDR2	PF3D7_0632800	erythrocyte membrane protein 1, PfEMP1	-3380.166667	-228.833333
S01 039	52	F	MAL6P1.1_CIDR2	PF3D7_0632800	erythrocyte membrane protein 1, PfEMP1	2362.5	-596.833333
S01 040	35	F	MAL6P1.1_CIDR2	PF3D7_0632800	erythrocyte membrane protein 1, PfEMP1	8490	1751.333333
S01 041	55	F	MAL6P1.1_CIDR2	PF3D7_0632800	erythrocyte membrane protein 1, PfEMP1	932.666667	879.833333
S01 042	44	F	MAL6P1.1_CIDR2	PF3D7_0632800	erythrocyte membrane protein 1, PfEMP1	3516.666667	-407.166667
S01 043	69	F	MAL6P1.1_CIDR2	PF3D7_0632800	erythrocyte membrane protein 1, PfEMP1	935.166667	1149.666667
S01 044	34	M	MAL6P1.1_CIDR2	PF3D7_0632800	erythrocyte membrane protein 1, PfEMP1	7838.666667	1824.333333
S01 045	68	M	MAL6P1.1_CIDR2	PF3D7_0632800	erythrocyte membrane protein 1, PfEMP1	514.5	2365.5
S01 046	56	M	MAL6P1.1_CIDR2	PF3D7_0632800	erythrocyte membrane protein 1, PfEMP1	1233.666667	-27.5
S01 047	58	M	MAL6P1.1_CIDR2	PF3D7_0632800	erythrocyte membrane protein 1, PfEMP1	8060.166667	699.333333
S01 048	35	M	MAL6P1.1_CIDR2	PF3D7_0632800	erythrocyte membrane protein 1, PfEMP1	798.166667	-752.833333
S01 049	59	M	MAL6P1.1_CIDR2	PF3D7_0632800	erythrocyte membrane protein 1, PfEMP1	-427.166667	776.166667
S01 050	31	M	MAL6P1.1_CIDR2	PF3D7_0632800	erythrocyte membrane protein 1, PfEMP1	3510.333333	1285.5
S01 051	23	F	MAL6P1.1_CIDR2	PF3D7_0632800	erythrocyte membrane protein 1, PfEMP1	982.333333	1500.5
S01 052	2	F	MAL6P1.1_CIDR2	PF3D7_0632800	erythrocyte membrane protein 1, PfEMP1	-39.833333	50.666667
S01 053	68	M	MAL6P1.1_CIDR2	PF3D7_0632800	erythrocyte membrane protein 1, PfEMP1	2877.333333	340.333333
S01 054	73	M	MAL6P1.1_CIDR2	PF3D7_0632800	erythrocyte membrane protein 1, PfEMP1	3970.5	172.5
S01 055	41	F	MAL6P1.1_CIDR2	PF3D7_0632800	erythrocyte membrane protein 1, PfEMP1	2156.333333	228.666667
S01 056	56	F	MAL6P1.1_CIDR2	PF3D7_0632800	erythrocyte membrane protein 1, PfEMP1	8058.333333	456.166667
S01 057	37	F	MAL6P1.1_CIDR2	PF3D7_0632800	erythrocyte membrane protein 1, PfEMP1	8631	2288.333333
S01 058	48	F	MAL6P1.1_CIDR2	PF3D7_0632800	erythrocyte membrane protein 1, PfEMP1	872.833333	-360.5
S01 059	27	F	MAL6P1.1_CIDR2	PF3D7_0632800	erythrocyte membrane protein 1, PfEMP1	3905	-2100.166667
S01 060	16	F	MAL6P1.1_CIDR2	PF3D7_0632800	erythrocyte membrane protein 1, PfEMP1	2220	-348.666667
S01 061	47	F	MAL6P1.1_CIDR2	PF3D7_0632800	erythrocyte membrane protein 1, PfEMP1	265.5	-2186.666667
S01 062	14	M	MAL6P1.1_CIDR2	PF3D7_0632800	erythrocyte membrane protein 1, PfEMP1	353.333333	-1748.833333
S01 063	32	F	MAL6P1.1_CIDR2	PF3D7_0632800	erythrocyte membrane protein 1, PfEMP1	930.666667	-872.833333
S01 064	31	F	MAL6P1.1_CIDR2	PF3D7_0632800	erythrocyte membrane protein 1, PfEMP1	435.833333	521.833333
S01 065	15	F	MAL6P1.1_CIDR2	PF3D7_0632800	erythrocyte membrane protein 1, PfEMP1	521.666667	-78
S01 066	60	F	MAL6P1.1_CIDR2	PF3D7_0632800	erythrocyte membrane protein 1, PfEMP1	570.333333	-877.166667
S01 067	25	F	MAL6P1.1_CIDR2	PF3D7_0632800	erythrocyte membrane protein 1, PfEMP1	1279	408
S01 068	54	M	MAL6P1.1_CIDR2	PF3D7_0632800	erythrocyte membrane protein 1, PfEMP1	5878.166667	1248.833333
S01 069	38	F	MAL6P1.1_CIDR2	PF3D7_0632800	erythrocyte membrane protein 1, PfEMP1	1998.166667	373.666667
S01 070	30	F	MAL6P1.1_CIDR2	PF3D7_0632800	erythrocyte membrane protein 1, PfEMP1	2996.5	1583
S01 071	37	F	MAL6P1.1_CIDR2	PF3D7_0632800	erythrocyte membrane protein 1, PfEMP1	2379.166667	-873.333333
S01 072	36	M	MAL6P1.1_CIDR2	PF3D7_0632800	erythrocyte membrane protein 1, PfEMP1	2866.333333	397.166667
S01 073	48	M	MAL6P1.1_CIDR2	PF3D7_0632800	erythrocyte membrane protein 1, PfEMP1	1525.5	-540.833333
S01 074	28	F	MAL6P1.1_CIDR2	PF3D7_0632800	erythrocyte membrane protein 1, PfEMP1	2067	-265.833333
S01 075	56	F	MAL6P1.1_CIDR2	PF3D7_0632800	erythrocyte membrane protein 1, PfEMP1	855.5	-42.666667
S01 076	28	F	MAL6P1.1_CIDR2	PF3D7_0632800	erythrocyte membrane protein 1, PfEMP1	4428	1060.333333
S01 077	64	F	MAL6P1.1_CIDR2	PF3D7_0632800	erythrocyte membrane protein 1, PfEMP1	2437.5	-508.833333
S01 078	65	F	MAL6P1.1_CIDR2	PF3D7_0632800	erythrocyte membrane protein 1, PfEMP1	6693.5	275
S01 079	12	M	MAL6P1.1_CIDR2	PF3D7_0632800	erythrocyte membrane protein 1, PfEMP1	198.666667	-385.5
S01 080	41	M	MAL6P1.1_CIDR2	PF3D7_0632800	erythrocyte membrane protein 1, PfEMP1	3521.333333	873.5
S01 081	8	M	MAL6P1.1_CIDR2	PF3D7_0632800	erythrocyte membrane protein 1, PfEMP1	391.5	-664.666667
S01 082	7	M	MAL6P1.1_CIDR2	PF3D7_0632800	erythrocyte membrane protein 1, PfEMP1	882	452
S01 083	7	M	MAL6P1.1_CIDR2	PF3D7_0632800	erythrocyte membrane protein 1, PfEMP1	224.833333	1083.333333
S01 084	7	M	MAL6P1.1_CIDR2	PF3D7_0632800	erythrocyte membrane protein 1, PfEMP1	378.833333	-125.333333
S01 085	7	M	MAL6P1.1_CIDR2	PF3D7_0632800	erythrocyte membrane protein 1, PfEMP1	188.5	-125.5
S01 086	8	F	MAL6P1.1_CIDR2	PF3D7_0632800	erythrocyte membrane protein 1, PfEMP1	6799	-436.333333
S01 087	7	F	MAL6P1.1_CIDR2	PF3D7_0632800	erythrocyte membrane protein 1, PfEMP1	-197.5	-632.5
S01 088	8	M	MAL6P1.1_CIDR2	PF3D7_0632800	erythrocyte membrane protein 1, PfEMP1	388.666667	-331.166667
S01 089	11	M	MAL6P1.1_CIDR2	PF3D7_0632800	erythrocyte membrane protein 1, PfEMP1	-309	-977.333333
S01 090	9	M	MAL6P1.1_CIDR2	PF3D7_0632800	erythrocyte membrane protein 1, PfEMP1	-165	-1068.833333
S01 091	8	M	MAL6P1.1_CIDR2	PF3D7_0632800	erythrocyte membrane protein 1, PfEMP1	-2078.166667	342.833333
S01 092	8	F	MAL6P1.1_CIDR2	PF3D7_0632800	erythrocyte membrane protein 1, PfEMP1	-251.833333	338
S01 093	9	F	MAL6P1.1_CIDR2	PF3D7_0632800	erythrocyte membrane protein 1, PfEMP1	2395.333333	-127.333333
S01 094	8	F	MAL6P1.1_CIDR2	PF3D7_0632800	erythrocyte membrane protein 1, PfEMP1	-359	-1326.5
S01 095	12	M	MAL6P1.1_CIDR2	PF3D7_0632800	erythrocyte membrane protein 1, PfEMP1	206.166667	-2315.666667
S01 096	12	F	MAL6P1.1_CIDR2	PF3D7_0632800	erythrocyte membrane protein 1, PfEMP1	500	-4506.666667
S01 097	12	F	MAL6P1.1_CIDR2	PF3D7_0632800	erythrocyte membrane protein 1, PfEMP1	2049.833333	126.333333
S01 098	10	F	MAL6P1.1_CIDR2	PF3D7_0632800	erythrocyte membrane protein 1, PfEMP1	-99	-1495.5
S01 099	11	F	MAL6P1.1_CIDR2	PF3D7_0632800	erythrocyte membrane protein 1, PfEMP1	1825	173
S01 100	10	F	MAL6P1.1_CIDR2	PF3D7_0632800	erythrocyte membrane protein 1, PfEMP1	-1044.5	-18.166667
S01 001	84	F	PF07_0007e1s1	PF3D7_0702400	small exported membrane protein 1	491.166667	1613
S01 002	54	F	PF07_0007e1s1	PF3D7_0702400	small exported membrane protein 1	2246.833333	176.833333
S01 003	50	F	PF07_0007e1s1	PF3D7_0702400	small exported membrane protein 1	1395.333333	379
S01 004	24	F	PF07_0007e1s1	PF3D7_0702400	small exported membrane protein 1	11713.16667	15362.5
S01 005	14	M	PF07_0007e1s1	PF3D7_0702400	small exported membrane protein 1	-439.5	313.833333
S01 006	13	M	PF07_0007e1s1	PF3D7_0702400	small exported membrane protein 1	-583.5	-154
S01 007	65	F	PF07_0007e1s1	PF3D7_0702400	small exported membrane protein 1	8535.833333	7616.166667
S01 008	70	F	PF07_0007e1s1	PF3D7_0702400	small exported membrane protein 1	1352.666667	-181.5
S01 009	45	M	PF07_0007e1s1	PF3D7_0702400	small exported membrane protein 1	3498.166667	3738.5
S01 010	2	M	PF07_0007e1s1	PF3D7_0702400	small exported membrane protein 1	-831	-105.833333
S01 011	68	F	PF07_0007e1s1	PF3D7_0702400	small exported membrane protein 1	12594.66667	10645.83333
S01 012	66	F	PF07_0007e1s1	PF3D7_0702400	small exported membrane protein 1	1383.666667	1019.666667
S01 013	69	F	PF07_0007e1s1	PF3D7_0702400	small exported membrane protein 1	11357.33333	7388.166667
S01 014	45	F	PF07_0007e1s1	PF3D7_0702400	small exported membrane protein 1	-1384	673.666667
S01 015	3	M	PF07_0007e1s1	PF3D7_0702400	small exported membrane protein 1	-257.166667	-626.5
S01 016	32	F	PF07_0007e1s1	PF3D7_0702400	small exported membrane protein 1	442.333333	2019.333333
S01 017	57	F	PF07_0007e1s1	PF3D7_0702400	small exported membrane protein 1	10976.83333	13525.16667
S01 018	2	F	PF07_0007e1s1	PF3D7_0702400	small exported membrane protein 1	-1177.166667	528.333333
S01 019	10	F	PF07_0007e1s1	PF3D7_0702400	small exported membrane protein 1	-959.166667	-1599.833333
S01 020	68	F	PF07_0007e1s1	PF3D7_0702400	small exported membrane protein 1	-1532	1408.833333
S01 021	17	F	PF07_0007e1s1	PF3D7_0702400	small exported membrane protein 1	-644	-199.166667
S01 022	56	F	PF07_0007e1s1	PF3D7_0702400	small exported membrane protein 1	8494.833333	3431.333333
S01 023	20	M	PF07_0007e1s1	PF3D7_0702400	small exported membrane protein 1	490.833333	-1954.833333
S01 024	15	M	PF07_0007e1s1	PF3D7_0702400	small exported membrane protein 1	715.333333	1309.5
S01 025	68	F	PF07_0007e1s1	PF3D7_0702400	small exported membrane protein 1	11983.83333	2410
S01 026	13	F	PF07_0007e1s1	PF3D7_0702400	small exported membrane protein 1	-30.666667	1286.833333
S01 027	54	F	PF07_0007e1s1	PF3D7_0702400	small exported membrane protein 1	3585	1228.333333
S01 028	19	F	PF07_0007e1s1	PF3D7_0702400	small exported membrane protein 1	558.333333	1415.5
S01 029	67	F	PF07_0007e1s1	PF3D7_0702400	small exported membrane protein 1	3020	2646.666667
S01 030	59	F	PF07_0007e1s1	PF3D7_0702400	small exported membrane protein 1	8867.166667	10518.83333
S01 031	68	M	PF07_0007e1s1	PF3D7_0702400	small exported membrane protein 1	6479.333333	420.666667
S01 032	63	M	PF07_0007e1s1	PF3D7_0702400	small exported membrane protein 1	9062.833333	2884
S01 033	39	F	PF07_0007e1s1	PF3D7_0702400	small exported membrane protein 1	14345.5	16483.83333
S01 034	36	F	PF07_0007e1s1	PF3D7_0702400	small exported membrane protein 1	10448.33333	86.5
S01 035	31	F	PF07_0007e1s1	PF3D7_0702400	small exported membrane protein 1	3250.333333	2976.333333
S01 036	63	F	PF07_0007e1s1	PF3D7_0702400	small exported membrane protein 1	11967	3866.666667
S01 037	48	F	PF07_0007e1s1	PF3D7_0702400	small exported membrane protein 1	-104.833333	-1049.5
S01 038	68	F	PF07_0007e1s1	PF3D7_0702400	small exported membrane protein 1	7432.833333	12421.16667
S01 039	52	F	PF07_0007e1s1	PF3D7_0702400	small exported membrane protein 1	11141.5	8823.166667
S01 040	35	F	PF07_0007e1s1	PF3D7_0702400	small exported membrane protein 1	2616	936.333333
S01 041	55	F	PF07_0007e1s1	PF3D7_0702400	small exported membrane protein 1	8271.666667	3189.833333
S01 042	44	F	PF07_0007e1s1	PF3D7_0702400	small exported membrane protein 1	3292.666667	1295.833333
S01 043	69	F	PF07_0007e1s1	PF3D7_0702400	small exported membrane protein 1	261.166667	1077.666667
S01 044	34	M	PF07_0007e1s1	PF3D7_0702400	small exported membrane protein 1	13327.66667	10440.33333
S01 045	68	M	PF07_0007e1s1	PF3D7_0702400	small exported membrane protein 1	-1025.5	1991.5
S01 046	56	M	PF07_0007e1s1	PF3D7_0702400	small exported membrane protein 1	394.666667	88.5
S01 047	58	M	PF07_0007e1s1	PF3D7_0702400	small exported membrane protein 1	8360.166667	1022.333333
S01 048	35	M	PF07_0007e1s1	PF3D7_0702400	small exported membrane protein 1	-359.833333	326.166667
S01 049	59	M	PF07_0007e1s1	PF3D7_0702400	small exported membrane protein 1	3176.833333	1146.166667
S01 050	31	M	PF07_0007e1s1	PF3D7_0702400	small exported membrane protein 1	10465.33333	11552.5
S01 051	23	F	PF07_0007e1s1	PF3D7_0702400	small exported membrane protein 1	2776.333333	1568.5
S01 052	2	F	PF07_0007e1s1	PF3D7_0702400	small exported membrane protein 1	247.166667	66.666667
S01 053	68	M	PF07_0007e1s1	PF3D7_0702400	small exported membrane protein 1	-218.666667	1096.333333
S01 054	73	M	PF07_0007e1s1	PF3D7_0702400	small exported membrane protein 1	2794.5	0.5
S01 055	41	F	PF07_0007e1s1	PF3D7_0702400	small exported membrane protein 1	15842.33333	13756.66667
S01 056	56	F	PF07_0007e1s1	PF3D7_0702400	small exported membrane protein 1	4824.333333	1104.166667
S01 057	37	F	PF07_0007e1s1	PF3D7_0702400	small exported membrane protein 1	13928	6892.333333
S01 058	48	F	PF07_0007e1s1	PF3D7_0702400	small exported membrane protein 1	13323.83333	3018.5
S01 059	27	F	PF07_0007e1s1	PF3D7_0702400	small exported membrane protein 1	3364	-2743.166667
S01 060	16	F	PF07_0007e1s1	PF3D7_0702400	small exported membrane protein 1	10068	11453.33333
S01 061	47	F	PF07_0007e1s1	PF3D7_0702400	small exported membrane protein 1	2666.5	-1342.666667
S01 062	14	M	PF07_0007e1s1	PF3D7_0702400	small exported membrane protein 1	1936.333333	-2974.833333
S01 063	32	F	PF07_0007e1s1	PF3D7_0702400	small exported membrane protein 1	1051.666667	338.166667
S01 064	31	F	PF07_0007e1s1	PF3D7_0702400	small exported membrane protein 1	5519.833333	2256.833333
S01 065	15	F	PF07_0007e1s1	PF3D7_0702400	small exported membrane protein 1	1391.666667	15
S01 066	60	F	PF07_0007e1s1	PF3D7_0702400	small exported membrane protein 1	3019.333333	-1228.166667
S01 067	25	F	PF07_0007e1s1	PF3D7_0702400	small exported membrane protein 1	10679	2899
S01 068	54	M	PF07_0007e1s1	PF3D7_0702400	small exported membrane protein 1	11208.16667	10388.83333
S01 069	38	F	PF07_0007e1s1	PF3D7_0702400	small exported membrane protein 1	9074.166667	1672.666667
S01 070	30	F	PF07_0007e1s1	PF3D7_0702400	small exported membrane protein 1	3705.5	2757
S01 071	37	F	PF07_0007e1s1	PF3D7_0702400	small exported membrane protein 1	2174.166667	2642.666667
S01 072	36	M	PF07_0007e1s1	PF3D7_0702400	small exported membrane protein 1	12292.33333	2326.166667
S01 073	48	M	PF07_0007e1s1	PF3D7_0702400	small exported membrane protein 1	13608.5	5919.166667
S01 074	28	F	PF07_0007e1s1	PF3D7_0702400	small exported membrane protein 1	2220	354.166667
S01 075	56	F	PF07_0007e1s1	PF3D7_0702400	small exported membrane protein 1	7851.5	927.333333
S01 076	28	F	PF07_0007e1s1	PF3D7_0702400	small exported membrane protein 1	5462	1413.333333
S01 077	64	F	PF07_0007e1s1	PF3D7_0702400	small exported membrane protein 1	11000.5	2186.166667
S01 078	65	F	PF07_0007e1s1	PF3D7_0702400	small exported membrane protein 1	7976.5	8127
S01 079	12	M	PF07_0007e1s1	PF3D7_0702400	small exported membrane protein 1	963.666667	30.5
S01 080	41	M	PF07_0007e1s1	PF3D7_0702400	small exported membrane protein 1	7228.333333	2823.5
S01 081	8	M	PF07_0007e1s1	PF3D7_0702400	small exported membrane protein 1	692.5	227.333333
S01 082	7	M	PF07_0007e1s1	PF3D7_0702400	small exported membrane protein 1	434	120
S01 083	7	M	PF07_0007e1s1	PF3D7_0702400	small exported membrane protein 1	373.833333	537.333333
S01 084	7	M	PF07_0007e1s1	PF3D7_0702400	small exported membrane protein 1	1163.833333	699.666667
S01 085	7	M	PF07_0007e1s1	PF3D7_0702400	small exported membrane protein 1	262.5	396.5
S01 086	8	F	PF07_0007e1s1	PF3D7_0702400	small exported membrane protein 1	7445	2027.666667
S01 087	7	F	PF07_0007e1s1	PF3D7_0702400	small exported membrane protein 1	112.5	180.5
S01 088	8	M	PF07_0007e1s1	PF3D7_0702400	small exported membrane protein 1	905.666667	192.833333
S01 089	11	M	PF07_0007e1s1	PF3D7_0702400	small exported membrane protein 1	232	-1854.333333
S01 090	9	M	PF07_0007e1s1	PF3D7_0702400	small exported membrane protein 1	24	-1074.833333
S01 091	8	M	PF07_0007e1s1	PF3D7_0702400	small exported membrane protein 1	670.833333	1605.833333
S01 092	8	F	PF07_0007e1s1	PF3D7_0702400	small exported membrane protein 1	-50.833333	-516
S01 093	9	F	PF07_0007e1s1	PF3D7_0702400	small exported membrane protein 1	2616.333333	-313.333333
S01 094	8	F	PF07_0007e1s1	PF3D7_0702400	small exported membrane protein 1	512	-2785.5
S01 095	12	M	PF07_0007e1s1	PF3D7_0702400	small exported membrane protein 1	623.166667	-2421.666667
S01 096	12	F	PF07_0007e1s1	PF3D7_0702400	small exported membrane protein 1	1542	-3085.666667
S01 097	12	F	PF07_0007e1s1	PF3D7_0702400	small exported membrane protein 1	1911.833333	-301.666667
S01 098	10	F	PF07_0007e1s1	PF3D7_0702400	small exported membrane protein 1	301	1007.5
S01 099	11	F	PF07_0007e1s1	PF3D7_0702400	small exported membrane protein 1	2279	1431
S01 100	10	F	PF07_0007e1s1	PF3D7_0702400	small exported membrane protein 1	1523.5	-573.166667
S01 001	84	F	PF11_0074_2o6	PF3D7_1106300	exonuclease, putative	5134.166667	2334
S01 002	54	F	PF11_0074_2o6	PF3D7_1106300	exonuclease, putative	1290.833333	139.833333
S01 003	50	F	PF11_0074_2o6	PF3D7_1106300	exonuclease, putative	7168.333333	1156
S01 004	24	F	PF11_0074_2o6	PF3D7_1106300	exonuclease, putative	3393.166667	854.5
S01 005	14	M	PF11_0074_2o6	PF3D7_1106300	exonuclease, putative	814.5	-117.166667
S01 006	13	M	PF11_0074_2o6	PF3D7_1106300	exonuclease, putative	96.5	-280
S01 007	65	F	PF11_0074_2o6	PF3D7_1106300	exonuclease, putative	10381.83333	16012.16667
S01 008	70	F	PF11_0074_2o6	PF3D7_1106300	exonuclease, putative	1514.666667	-554.5
S01 009	45	M	PF11_0074_2o6	PF3D7_1106300	exonuclease, putative	3614.166667	282.5
S01 010	2	M	PF11_0074_2o6	PF3D7_1106300	exonuclease, putative	-600	384.166667
S01 011	68	F	PF11_0074_2o6	PF3D7_1106300	exonuclease, putative	2290.666667	731.833333
S01 012	66	F	PF11_0074_2o6	PF3D7_1106300	exonuclease, putative	4824.666667	2554.666667
S01 013	69	F	PF11_0074_2o6	PF3D7_1106300	exonuclease, putative	1702.333333	292.166667
S01 014	45	F	PF11_0074_2o6	PF3D7_1106300	exonuclease, putative	-515	-609.333333
S01 015	3	M	PF11_0074_2o6	PF3D7_1106300	exonuclease, putative	286.833333	-994.5
S01 016	32	F	PF11_0074_2o6	PF3D7_1106300	exonuclease, putative	1353.333333	340.333333
S01 017	57	F	PF11_0074_2o6	PF3D7_1106300	exonuclease, putative	2567.833333	80.166667
S01 018	2	F	PF11_0074_2o6	PF3D7_1106300	exonuclease, putative	975.833333	-692.666667
S01 019	10	F	PF11_0074_2o6	PF3D7_1106300	exonuclease, putative	734.833333	-1158.833333
S01 020	68	F	PF11_0074_2o6	PF3D7_1106300	exonuclease, putative	13985	14168.83333
S01 021	17	F	PF11_0074_2o6	PF3D7_1106300	exonuclease, putative	-588	-682.166667
S01 022	56	F	PF11_0074_2o6	PF3D7_1106300	exonuclease, putative	3227.833333	-215.666667
S01 023	20	M	PF11_0074_2o6	PF3D7_1106300	exonuclease, putative	2382.833333	-1611.833333
S01 024	15	M	PF11_0074_2o6	PF3D7_1106300	exonuclease, putative	560.333333	644.5
S01 025	68	F	PF11_0074_2o6	PF3D7_1106300	exonuclease, putative	5823.833333	527
S01 026	13	F	PF11_0074_2o6	PF3D7_1106300	exonuclease, putative	231.333333	309.833333
S01 027	54	F	PF11_0074_2o6	PF3D7_1106300	exonuclease, putative	3227	-1391.666667
S01 028	19	F	PF11_0074_2o6	PF3D7_1106300	exonuclease, putative	3008.333333	918.5
S01 029	67	F	PF11_0074_2o6	PF3D7_1106300	exonuclease, putative	12572	5275.666667
S01 030	59	F	PF11_0074_2o6	PF3D7_1106300	exonuclease, putative	7500.166667	2983.833333
S01 031	68	M	PF11_0074_2o6	PF3D7_1106300	exonuclease, putative	4899.333333	-2007.333333
S01 032	63	M	PF11_0074_2o6	PF3D7_1106300	exonuclease, putative	6275.833333	-59
S01 033	39	F	PF11_0074_2o6	PF3D7_1106300	exonuclease, putative	6982.5	1442.833333
S01 034	36	F	PF11_0074_2o6	PF3D7_1106300	exonuclease, putative	2739.333333	-544.5
S01 035	31	F	PF11_0074_2o6	PF3D7_1106300	exonuclease, putative	-3331.666667	-828.666667
S01 036	63	F	PF11_0074_2o6	PF3D7_1106300	exonuclease, putative	3701	-596.333333
S01 037	48	F	PF11_0074_2o6	PF3D7_1106300	exonuclease, putative	1644.166667	-1247.5
S01 038	68	F	PF11_0074_2o6	PF3D7_1106300	exonuclease, putative	3155.833333	1432.166667
S01 039	52	F	PF11_0074_2o6	PF3D7_1106300	exonuclease, putative	8515.5	-650.833333
S01 040	35	F	PF11_0074_2o6	PF3D7_1106300	exonuclease, putative	1636	1296.333333
S01 041	55	F	PF11_0074_2o6	PF3D7_1106300	exonuclease, putative	650.666667	-32.166667
S01 042	44	F	PF11_0074_2o6	PF3D7_1106300	exonuclease, putative	1880.666667	977.833333
S01 043	69	F	PF11_0074_2o6	PF3D7_1106300	exonuclease, putative	4205.166667	1180.666667
S01 044	34	M	PF11_0074_2o6	PF3D7_1106300	exonuclease, putative	14762.66667	3381.333333
S01 045	68	M	PF11_0074_2o6	PF3D7_1106300	exonuclease, putative	2925.5	1646.5
S01 046	56	M	PF11_0074_2o6	PF3D7_1106300	exonuclease, putative	1689.666667	733.5
S01 047	58	M	PF11_0074_2o6	PF3D7_1106300	exonuclease, putative	10104.16667	-106.666667
S01 048	35	M	PF11_0074_2o6	PF3D7_1106300	exonuclease, putative	947.166667	145.166667
S01 049	59	M	PF11_0074_2o6	PF3D7_1106300	exonuclease, putative	1300.833333	1069.166667
S01 050	31	M	PF11_0074_2o6	PF3D7_1106300	exonuclease, putative	1709.333333	2046.5
S01 051	23	F	PF11_0074_2o6	PF3D7_1106300	exonuclease, putative	7851.333333	-77.5
S01 052	2	F	PF11_0074_2o6	PF3D7_1106300	exonuclease, putative	1038.166667	-759.333333
S01 053	68	M	PF11_0074_2o6	PF3D7_1106300	exonuclease, putative	7.333333	595.333333
S01 054	73	M	PF11_0074_2o6	PF3D7_1106300	exonuclease, putative	3889.5	778.5
S01 055	41	F	PF11_0074_2o6	PF3D7_1106300	exonuclease, putative	-228.666667	-687.333333
S01 056	56	F	PF11_0074_2o6	PF3D7_1106300	exonuclease, putative	803.333333	831.166667
S01 057	37	F	PF11_0074_2o6	PF3D7_1106300	exonuclease, putative	1174	384.333333
S01 058	48	F	PF11_0074_2o6	PF3D7_1106300	exonuclease, putative	370.833333	-235.5
S01 059	27	F	PF11_0074_2o6	PF3D7_1106300	exonuclease, putative	10104	214.833333
S01 060	16	F	PF11_0074_2o6	PF3D7_1106300	exonuclease, putative	1990	91.333333
S01 061	47	F	PF11_0074_2o6	PF3D7_1106300	exonuclease, putative	4180.5	-1134.666667
S01 062	14	M	PF11_0074_2o6	PF3D7_1106300	exonuclease, putative	3289.333333	89.166667
S01 063	32	F	PF11_0074_2o6	PF3D7_1106300	exonuclease, putative	469.666667	-593.833333
S01 064	31	F	PF11_0074_2o6	PF3D7_1106300	exonuclease, putative	13843.83333	5129.833333
S01 065	15	F	PF11_0074_2o6	PF3D7_1106300	exonuclease, putative	13120.66667	3714
S01 066	60	F	PF11_0074_2o6	PF3D7_1106300	exonuclease, putative	3552.333333	-423.166667
S01 067	25	F	PF11_0074_2o6	PF3D7_1106300	exonuclease, putative	467	-822
S01 068	54	M	PF11_0074_2o6	PF3D7_1106300	exonuclease, putative	10926.16667	5379.833333
S01 069	38	F	PF11_0074_2o6	PF3D7_1106300	exonuclease, putative	3009.166667	-2073.333333
S01 070	30	F	PF11_0074_2o6	PF3D7_1106300	exonuclease, putative	3885.5	528
S01 071	37	F	PF11_0074_2o6	PF3D7_1106300	exonuclease, putative	1561.166667	1444.666667
S01 072	36	M	PF11_0074_2o6	PF3D7_1106300	exonuclease, putative	13714.33333	5695.166667
S01 073	48	M	PF11_0074_2o6	PF3D7_1106300	exonuclease, putative	1885.5	517.166667
S01 074	28	F	PF11_0074_2o6	PF3D7_1106300	exonuclease, putative	1219	423.166667
S01 075	56	F	PF11_0074_2o6	PF3D7_1106300	exonuclease, putative	1053.5	178.333333
S01 076	28	F	PF11_0074_2o6	PF3D7_1106300	exonuclease, putative	1481	155.333333
S01 077	64	F	PF11_0074_2o6	PF3D7_1106300	exonuclease, putative	2167.5	-114.833333
S01 078	65	F	PF11_0074_2o6	PF3D7_1106300	exonuclease, putative	7434.5	1676
S01 079	12	M	PF11_0074_2o6	PF3D7_1106300	exonuclease, putative	575.666667	292.5
S01 080	41	M	PF11_0074_2o6	PF3D7_1106300	exonuclease, putative	1655.333333	363.5
S01 081	8	M	PF11_0074_2o6	PF3D7_1106300	exonuclease, putative	31.5	-548.666667
S01 082	7	M	PF11_0074_2o6	PF3D7_1106300	exonuclease, putative	783	453
S01 083	7	M	PF11_0074_2o6	PF3D7_1106300	exonuclease, putative	-459.166667	359.333333
S01 084	7	M	PF11_0074_2o6	PF3D7_1106300	exonuclease, putative	1017.833333	-349.333333
S01 085	7	M	PF11_0074_2o6	PF3D7_1106300	exonuclease, putative	313.5	-271.5
S01 086	8	F	PF11_0074_2o6	PF3D7_1106300	exonuclease, putative	7233	1330.666667
S01 087	7	F	PF11_0074_2o6	PF3D7_1106300	exonuclease, putative	254.5	-90.5
S01 088	8	M	PF11_0074_2o6	PF3D7_1106300	exonuclease, putative	628.666667	-315.166667
S01 089	11	M	PF11_0074_2o6	PF3D7_1106300	exonuclease, putative	10553	-1680.333333
S01 090	9	M	PF11_0074_2o6	PF3D7_1106300	exonuclease, putative	-275	-1016.833333
S01 091	8	M	PF11_0074_2o6	PF3D7_1106300	exonuclease, putative	-604.166667	-71.166667
S01 092	8	F	PF11_0074_2o6	PF3D7_1106300	exonuclease, putative	362.166667	72
S01 093	9	F	PF11_0074_2o6	PF3D7_1106300	exonuclease, putative	1460.333333	-1049.333333
S01 094	8	F	PF11_0074_2o6	PF3D7_1106300	exonuclease, putative	-255	-2532.5
S01 095	12	M	PF11_0074_2o6	PF3D7_1106300	exonuclease, putative	8251.166667	-81.666667
S01 096	12	F	PF11_0074_2o6	PF3D7_1106300	exonuclease, putative	283	-5178.666667
S01 097	12	F	PF11_0074_2o6	PF3D7_1106300	exonuclease, putative	1018.833333	1389.333333
S01 098	10	F	PF11_0074_2o6	PF3D7_1106300	exonuclease, putative	-268	-3347.5
S01 099	11	F	PF11_0074_2o6	PF3D7_1106300	exonuclease, putative	2909	1509
S01 100	10	F	PF11_0074_2o6	PF3D7_1106300	exonuclease, putative	-129.5	-448.166667
S01 001	84	F	PFC0670c.1o1	PF3D7_0315400	conserved Plasmodium protein, unknown function	6264.166667	3533
S01 002	54	F	PFC0670c.1o1	PF3D7_0315400	conserved Plasmodium protein, unknown function	5035.833333	3232.833333
S01 003	50	F	PFC0670c.1o1	PF3D7_0315400	conserved Plasmodium protein, unknown function	3791.333333	2113
S01 004	24	F	PFC0670c.1o1	PF3D7_0315400	conserved Plasmodium protein, unknown function	3867.166667	447.5
S01 005	14	M	PFC0670c.1o1	PF3D7_0315400	conserved Plasmodium protein, unknown function	1311.5	1217.833333
S01 006	13	M	PFC0670c.1o1	PF3D7_0315400	conserved Plasmodium protein, unknown function	999.5	1212
S01 007	65	F	PFC0670c.1o1	PF3D7_0315400	conserved Plasmodium protein, unknown function	10993.83333	10816.16667
S01 008	70	F	PFC0670c.1o1	PF3D7_0315400	conserved Plasmodium protein, unknown function	1561.666667	-109.5
S01 009	45	M	PFC0670c.1o1	PF3D7_0315400	conserved Plasmodium protein, unknown function	4999.166667	4980.5
S01 010	2	M	PFC0670c.1o1	PF3D7_0315400	conserved Plasmodium protein, unknown function	-310	735.166667
S01 011	68	F	PFC0670c.1o1	PF3D7_0315400	conserved Plasmodium protein, unknown function	3754.666667	1782.833333
S01 012	66	F	PFC0670c.1o1	PF3D7_0315400	conserved Plasmodium protein, unknown function	12404.66667	6151.666667
S01 013	69	F	PFC0670c.1o1	PF3D7_0315400	conserved Plasmodium protein, unknown function	6774.333333	2203.166667
S01 014	45	F	PFC0670c.1o1	PF3D7_0315400	conserved Plasmodium protein, unknown function	1954	651.666667
S01 015	3	M	PFC0670c.1o1	PF3D7_0315400	conserved Plasmodium protein, unknown function	1217.833333	598.5
S01 016	32	F	PFC0670c.1o1	PF3D7_0315400	conserved Plasmodium protein, unknown function	3380.333333	1635.333333
S01 017	57	F	PFC0670c.1o1	PF3D7_0315400	conserved Plasmodium protein, unknown function	3675.833333	2816.166667
S01 018	2	F	PFC0670c.1o1	PF3D7_0315400	conserved Plasmodium protein, unknown function	275.833333	480.333333
S01 019	10	F	PFC0670c.1o1	PF3D7_0315400	conserved Plasmodium protein, unknown function	744.833333	-97.833333
S01 020	68	F	PFC0670c.1o1	PF3D7_0315400	conserved Plasmodium protein, unknown function	13257	9507.833333
S01 021	17	F	PFC0670c.1o1	PF3D7_0315400	conserved Plasmodium protein, unknown function	1217	599.833333
S01 022	56	F	PFC0670c.1o1	PF3D7_0315400	conserved Plasmodium protein, unknown function	5274.833333	2923.333333
S01 023	20	M	PFC0670c.1o1	PF3D7_0315400	conserved Plasmodium protein, unknown function	2444.833333	-4137.833333
S01 024	15	M	PFC0670c.1o1	PF3D7_0315400	conserved Plasmodium protein, unknown function	1832.333333	1955.5
S01 025	68	F	PFC0670c.1o1	PF3D7_0315400	conserved Plasmodium protein, unknown function	7499.833333	1284
S01 026	13	F	PFC0670c.1o1	PF3D7_0315400	conserved Plasmodium protein, unknown function	327.333333	1135.833333
S01 027	54	F	PFC0670c.1o1	PF3D7_0315400	conserved Plasmodium protein, unknown function	1483	-1164.666667
S01 028	19	F	PFC0670c.1o1	PF3D7_0315400	conserved Plasmodium protein, unknown function	1517.333333	276.5
S01 029	67	F	PFC0670c.1o1	PF3D7_0315400	conserved Plasmodium protein, unknown function	13292	9349.666667
S01 030	59	F	PFC0670c.1o1	PF3D7_0315400	conserved Plasmodium protein, unknown function	8707.166667	6301.833333
S01 031	68	M	PFC0670c.1o1	PF3D7_0315400	conserved Plasmodium protein, unknown function	6805.333333	-1608.333333
S01 032	63	M	PFC0670c.1o1	PF3D7_0315400	conserved Plasmodium protein, unknown function	9732.833333	2582
S01 033	39	F	PFC0670c.1o1	PF3D7_0315400	conserved Plasmodium protein, unknown function	1369.5	648.833333
S01 034	36	F	PFC0670c.1o1	PF3D7_0315400	conserved Plasmodium protein, unknown function	4562.333333	2104.5
S01 035	31	F	PFC0670c.1o1	PF3D7_0315400	conserved Plasmodium protein, unknown function	1779.333333	2697.333333
S01 036	63	F	PFC0670c.1o1	PF3D7_0315400	conserved Plasmodium protein, unknown function	816	1545.666667
S01 037	48	F	PFC0670c.1o1	PF3D7_0315400	conserved Plasmodium protein, unknown function	318.166667	68.5
S01 038	68	F	PFC0670c.1o1	PF3D7_0315400	conserved Plasmodium protein, unknown function	3887.833333	2301.166667
S01 039	52	F	PFC0670c.1o1	PF3D7_0315400	conserved Plasmodium protein, unknown function	9424.5	96.166667
S01 040	35	F	PFC0670c.1o1	PF3D7_0315400	conserved Plasmodium protein, unknown function	2748	1977.333333
S01 041	55	F	PFC0670c.1o1	PF3D7_0315400	conserved Plasmodium protein, unknown function	5819.666667	3045.833333
S01 042	44	F	PFC0670c.1o1	PF3D7_0315400	conserved Plasmodium protein, unknown function	3193.666667	150.833333
S01 043	69	F	PFC0670c.1o1	PF3D7_0315400	conserved Plasmodium protein, unknown function	2222.166667	2978.666667
S01 044	34	M	PFC0670c.1o1	PF3D7_0315400	conserved Plasmodium protein, unknown function	2614.666667	872.333333
S01 045	68	M	PFC0670c.1o1	PF3D7_0315400	conserved Plasmodium protein, unknown function	-567.5	3037.5
S01 046	56	M	PFC0670c.1o1	PF3D7_0315400	conserved Plasmodium protein, unknown function	4016.666667	843.5
S01 047	58	M	PFC0670c.1o1	PF3D7_0315400	conserved Plasmodium protein, unknown function	10579.16667	2356.333333
S01 048	35	M	PFC0670c.1o1	PF3D7_0315400	conserved Plasmodium protein, unknown function	4704.166667	2872.166667
S01 049	59	M	PFC0670c.1o1	PF3D7_0315400	conserved Plasmodium protein, unknown function	3168.833333	1199.166667
S01 050	31	M	PFC0670c.1o1	PF3D7_0315400	conserved Plasmodium protein, unknown function	10837.33333	12122.5
S01 051	23	F	PFC0670c.1o1	PF3D7_0315400	conserved Plasmodium protein, unknown function	5181.333333	1357.5
S01 052	2	F	PFC0670c.1o1	PF3D7_0315400	conserved Plasmodium protein, unknown function	947.166667	1130.666667
S01 053	68	M	PFC0670c.1o1	PF3D7_0315400	conserved Plasmodium protein, unknown function	884.333333	1453.333333
S01 054	73	M	PFC0670c.1o1	PF3D7_0315400	conserved Plasmodium protein, unknown function	5356.5	977.5
S01 055	41	F	PFC0670c.1o1	PF3D7_0315400	conserved Plasmodium protein, unknown function	2164.333333	1199.666667
S01 056	56	F	PFC0670c.1o1	PF3D7_0315400	conserved Plasmodium protein, unknown function	3386.333333	2148.166667
S01 057	37	F	PFC0670c.1o1	PF3D7_0315400	conserved Plasmodium protein, unknown function	1726	1809.333333
S01 058	48	F	PFC0670c.1o1	PF3D7_0315400	conserved Plasmodium protein, unknown function	7100.833333	879.5
S01 059	27	F	PFC0670c.1o1	PF3D7_0315400	conserved Plasmodium protein, unknown function	1951	-539.166667
S01 060	16	F	PFC0670c.1o1	PF3D7_0315400	conserved Plasmodium protein, unknown function	2542	509.333333
S01 061	47	F	PFC0670c.1o1	PF3D7_0315400	conserved Plasmodium protein, unknown function	4978.5	-1114.666667
S01 062	14	M	PFC0670c.1o1	PF3D7_0315400	conserved Plasmodium protein, unknown function	3492.333333	-507.833333
S01 063	32	F	PFC0670c.1o1	PF3D7_0315400	conserved Plasmodium protein, unknown function	3847.666667	1626.166667
S01 064	31	F	PFC0670c.1o1	PF3D7_0315400	conserved Plasmodium protein, unknown function	2371.833333	1483.833333
S01 065	15	F	PFC0670c.1o1	PF3D7_0315400	conserved Plasmodium protein, unknown function	1221.666667	-1012
S01 066	60	F	PFC0670c.1o1	PF3D7_0315400	conserved Plasmodium protein, unknown function	3698.333333	862.833333
S01 067	25	F	PFC0670c.1o1	PF3D7_0315400	conserved Plasmodium protein, unknown function	2008	551
S01 068	54	M	PFC0670c.1o1	PF3D7_0315400	conserved Plasmodium protein, unknown function	12995.16667	14693.83333
S01 069	38	F	PFC0670c.1o1	PF3D7_0315400	conserved Plasmodium protein, unknown function	6270.166667	1822.666667
S01 070	30	F	PFC0670c.1o1	PF3D7_0315400	conserved Plasmodium protein, unknown function	4317.5	2940
S01 071	37	F	PFC0670c.1o1	PF3D7_0315400	conserved Plasmodium protein, unknown function	2605.166667	2362.666667
S01 072	36	M	PFC0670c.1o1	PF3D7_0315400	conserved Plasmodium protein, unknown function	13927.33333	6301.166667
S01 073	48	M	PFC0670c.1o1	PF3D7_0315400	conserved Plasmodium protein, unknown function	5545.5	1129.166667
S01 074	28	F	PFC0670c.1o1	PF3D7_0315400	conserved Plasmodium protein, unknown function	1157	875.166667
S01 075	56	F	PFC0670c.1o1	PF3D7_0315400	conserved Plasmodium protein, unknown function	5716.5	1849.333333
S01 076	28	F	PFC0670c.1o1	PF3D7_0315400	conserved Plasmodium protein, unknown function	1894	1245.333333
S01 077	64	F	PFC0670c.1o1	PF3D7_0315400	conserved Plasmodium protein, unknown function	3519.5	1929.166667
S01 078	65	F	PFC0670c.1o1	PF3D7_0315400	conserved Plasmodium protein, unknown function	8313.5	4981
S01 079	12	M	PFC0670c.1o1	PF3D7_0315400	conserved Plasmodium protein, unknown function	1567.666667	1457.5
S01 080	41	M	PFC0670c.1o1	PF3D7_0315400	conserved Plasmodium protein, unknown function	2134.333333	1986.5
S01 081	8	M	PFC0670c.1o1	PF3D7_0315400	conserved Plasmodium protein, unknown function	775.5	409.333333
S01 082	7	M	PFC0670c.1o1	PF3D7_0315400	conserved Plasmodium protein, unknown function	1829	1202
S01 083	7	M	PFC0670c.1o1	PF3D7_0315400	conserved Plasmodium protein, unknown function	1109.833333	1305.333333
S01 084	7	M	PFC0670c.1o1	PF3D7_0315400	conserved Plasmodium protein, unknown function	1139.833333	1223.666667
S01 085	7	M	PFC0670c.1o1	PF3D7_0315400	conserved Plasmodium protein, unknown function	2517.5	1037.5
S01 086	8	F	PFC0670c.1o1	PF3D7_0315400	conserved Plasmodium protein, unknown function	8228	3037.666667
S01 087	7	F	PFC0670c.1o1	PF3D7_0315400	conserved Plasmodium protein, unknown function	4519.5	3115.5
S01 088	8	M	PFC0670c.1o1	PF3D7_0315400	conserved Plasmodium protein, unknown function	2493.666667	539.833333
S01 089	11	M	PFC0670c.1o1	PF3D7_0315400	conserved Plasmodium protein, unknown function	15488	536.666667
S01 090	9	M	PFC0670c.1o1	PF3D7_0315400	conserved Plasmodium protein, unknown function	628	928.166667
S01 091	8	M	PFC0670c.1o1	PF3D7_0315400	conserved Plasmodium protein, unknown function	491.833333	1787.833333
S01 092	8	F	PFC0670c.1o1	PF3D7_0315400	conserved Plasmodium protein, unknown function	1074.166667	1067
S01 093	9	F	PFC0670c.1o1	PF3D7_0315400	conserved Plasmodium protein, unknown function	2428.333333	-337.333333
S01 094	8	F	PFC0670c.1o1	PF3D7_0315400	conserved Plasmodium protein, unknown function	1338	-1594.5
S01 095	12	M	PFC0670c.1o1	PF3D7_0315400	conserved Plasmodium protein, unknown function	2982.166667	-17.666667
S01 096	12	F	PFC0670c.1o1	PF3D7_0315400	conserved Plasmodium protein, unknown function	2662	-5273.666667
S01 097	12	F	PFC0670c.1o1	PF3D7_0315400	conserved Plasmodium protein, unknown function	593.833333	936.333333
S01 098	10	F	PFC0670c.1o1	PF3D7_0315400	conserved Plasmodium protein, unknown function	1033	-5024.5
S01 099	11	F	PFC0670c.1o1	PF3D7_0315400	conserved Plasmodium protein, unknown function	3324	2782
S01 100	10	F	PFC0670c.1o1	PF3D7_0315400	conserved Plasmodium protein, unknown function	2677.5	-869.166667
S01 001	84	F	PFI1755c.2o2	PF3D7_0936300	ring-exported protein 3	6591.166667	7115
S01 002	54	F	PFI1755c.2o2	PF3D7_0936300	ring-exported protein 3	723.833333	-649.166667
S01 003	50	F	PFI1755c.2o2	PF3D7_0936300	ring-exported protein 3	-210.666667	-458
S01 004	24	F	PFI1755c.2o2	PF3D7_0936300	ring-exported protein 3	1898.166667	-942.5
S01 005	14	M	PFI1755c.2o2	PF3D7_0936300	ring-exported protein 3	1092.5	-797.166667
S01 006	13	M	PFI1755c.2o2	PF3D7_0936300	ring-exported protein 3	-161.5	-243
S01 007	65	F	PFI1755c.2o2	PF3D7_0936300	ring-exported protein 3	9539.833333	2485.166667
S01 008	70	F	PFI1755c.2o2	PF3D7_0936300	ring-exported protein 3	1645.666667	54.5
S01 009	45	M	PFI1755c.2o2	PF3D7_0936300	ring-exported protein 3	3992.166667	-339.5
S01 010	2	M	PFI1755c.2o2	PF3D7_0936300	ring-exported protein 3	360	357.166667
S01 011	68	F	PFI1755c.2o2	PF3D7_0936300	ring-exported protein 3	647.666667	-432.166667
S01 012	66	F	PFI1755c.2o2	PF3D7_0936300	ring-exported protein 3	1820.666667	1603.666667
S01 013	69	F	PFI1755c.2o2	PF3D7_0936300	ring-exported protein 3	1222.333333	19.166667
S01 014	45	F	PFI1755c.2o2	PF3D7_0936300	ring-exported protein 3	691	-773.333333
S01 015	3	M	PFI1755c.2o2	PF3D7_0936300	ring-exported protein 3	-791.166667	-1213.5
S01 016	32	F	PFI1755c.2o2	PF3D7_0936300	ring-exported protein 3	2899.333333	26.333333
S01 017	57	F	PFI1755c.2o2	PF3D7_0936300	ring-exported protein 3	2930.833333	398.166667
S01 018	2	F	PFI1755c.2o2	PF3D7_0936300	ring-exported protein 3	965.833333	-1885.666667
S01 019	10	F	PFI1755c.2o2	PF3D7_0936300	ring-exported protein 3	418.833333	-1041.833333
S01 020	68	F	PFI1755c.2o2	PF3D7_0936300	ring-exported protein 3	451	-22.166667
S01 021	17	F	PFI1755c.2o2	PF3D7_0936300	ring-exported protein 3	1241	-369.166667
S01 022	56	F	PFI1755c.2o2	PF3D7_0936300	ring-exported protein 3	3211.833333	-178.666667
S01 023	20	M	PFI1755c.2o2	PF3D7_0936300	ring-exported protein 3	1425.833333	-2900.833333
S01 024	15	M	PFI1755c.2o2	PF3D7_0936300	ring-exported protein 3	901.333333	-547.5
S01 025	68	F	PFI1755c.2o2	PF3D7_0936300	ring-exported protein 3	11984.83333	97
S01 026	13	F	PFI1755c.2o2	PF3D7_0936300	ring-exported protein 3	93.333333	-746.166667
S01 027	54	F	PFI1755c.2o2	PF3D7_0936300	ring-exported protein 3	924	-296.666667
S01 028	19	F	PFI1755c.2o2	PF3D7_0936300	ring-exported protein 3	1084.333333	149.5
S01 029	67	F	PFI1755c.2o2	PF3D7_0936300	ring-exported protein 3	9462	463.666667
S01 030	59	F	PFI1755c.2o2	PF3D7_0936300	ring-exported protein 3	7946.166667	989.833333
S01 031	68	M	PFI1755c.2o2	PF3D7_0936300	ring-exported protein 3	5718.333333	-2088.333333
S01 032	63	M	PFI1755c.2o2	PF3D7_0936300	ring-exported protein 3	5922.833333	-1533
S01 033	39	F	PFI1755c.2o2	PF3D7_0936300	ring-exported protein 3	2337.5	741.833333
S01 034	36	F	PFI1755c.2o2	PF3D7_0936300	ring-exported protein 3	10920.33333	4535.5
S01 035	31	F	PFI1755c.2o2	PF3D7_0936300	ring-exported protein 3	-758.666667	1535.333333
S01 036	63	F	PFI1755c.2o2	PF3D7_0936300	ring-exported protein 3	912	-771.333333
S01 037	48	F	PFI1755c.2o2	PF3D7_0936300	ring-exported protein 3	134.166667	-1113.5
S01 038	68	F	PFI1755c.2o2	PF3D7_0936300	ring-exported protein 3	2309.833333	22.166667
S01 039	52	F	PFI1755c.2o2	PF3D7_0936300	ring-exported protein 3	8853.5	92.166667
S01 040	35	F	PFI1755c.2o2	PF3D7_0936300	ring-exported protein 3	4960	725.333333
S01 041	55	F	PFI1755c.2o2	PF3D7_0936300	ring-exported protein 3	13774.66667	4654.833333
S01 042	44	F	PFI1755c.2o2	PF3D7_0936300	ring-exported protein 3	11105.66667	5794.833333
S01 043	69	F	PFI1755c.2o2	PF3D7_0936300	ring-exported protein 3	567.166667	1175.666667
S01 044	34	M	PFI1755c.2o2	PF3D7_0936300	ring-exported protein 3	2585.666667	513.333333
S01 045	68	M	PFI1755c.2o2	PF3D7_0936300	ring-exported protein 3	443.5	1115.5
S01 046	56	M	PFI1755c.2o2	PF3D7_0936300	ring-exported protein 3	1722.666667	145.5
S01 047	58	M	PFI1755c.2o2	PF3D7_0936300	ring-exported protein 3	9870.166667	536.333333
S01 048	35	M	PFI1755c.2o2	PF3D7_0936300	ring-exported protein 3	-72.833333	-407.833333
S01 049	59	M	PFI1755c.2o2	PF3D7_0936300	ring-exported protein 3	1968.833333	2521.166667
S01 050	31	M	PFI1755c.2o2	PF3D7_0936300	ring-exported protein 3	7056.333333	1130.5
S01 051	23	F	PFI1755c.2o2	PF3D7_0936300	ring-exported protein 3	1509.333333	69.5
S01 052	2	F	PFI1755c.2o2	PF3D7_0936300	ring-exported protein 3	-912.833333	436.666667
S01 053	68	M	PFI1755c.2o2	PF3D7_0936300	ring-exported protein 3	1465.333333	1048.333333
S01 054	73	M	PFI1755c.2o2	PF3D7_0936300	ring-exported protein 3	15186.5	2584.5
S01 055	41	F	PFI1755c.2o2	PF3D7_0936300	ring-exported protein 3	2498.333333	-141.333333
S01 056	56	F	PFI1755c.2o2	PF3D7_0936300	ring-exported protein 3	85.333333	-647.833333
S01 057	37	F	PFI1755c.2o2	PF3D7_0936300	ring-exported protein 3	15980	12194.33333
S01 058	48	F	PFI1755c.2o2	PF3D7_0936300	ring-exported protein 3	4695.833333	-690.5
S01 059	27	F	PFI1755c.2o2	PF3D7_0936300	ring-exported protein 3	1879	-327.166667
S01 060	16	F	PFI1755c.2o2	PF3D7_0936300	ring-exported protein 3	1442	-726.666667
S01 061	47	F	PFI1755c.2o2	PF3D7_0936300	ring-exported protein 3	5086.5	192.333333
S01 062	14	M	PFI1755c.2o2	PF3D7_0936300	ring-exported protein 3	1920.333333	-2358.833333
S01 063	32	F	PFI1755c.2o2	PF3D7_0936300	ring-exported protein 3	1995.666667	-621.833333
S01 064	31	F	PFI1755c.2o2	PF3D7_0936300	ring-exported protein 3	1882.833333	-333.166667
S01 065	15	F	PFI1755c.2o2	PF3D7_0936300	ring-exported protein 3	792.666667	-2285
S01 066	60	F	PFI1755c.2o2	PF3D7_0936300	ring-exported protein 3	642.333333	-1610.166667
S01 067	25	F	PFI1755c.2o2	PF3D7_0936300	ring-exported protein 3	1766	-1391
S01 068	54	M	PFI1755c.2o2	PF3D7_0936300	ring-exported protein 3	7136.166667	1541.833333
S01 069	38	F	PFI1755c.2o2	PF3D7_0936300	ring-exported protein 3	3801.166667	944.666667
S01 070	30	F	PFI1755c.2o2	PF3D7_0936300	ring-exported protein 3	3743.5	-359
S01 071	37	F	PFI1755c.2o2	PF3D7_0936300	ring-exported protein 3	401.166667	-1120.333333
S01 072	36	M	PFI1755c.2o2	PF3D7_0936300	ring-exported protein 3	4383.333333	1169.166667
S01 073	48	M	PFI1755c.2o2	PF3D7_0936300	ring-exported protein 3	7172.5	-432.833333
S01 074	28	F	PFI1755c.2o2	PF3D7_0936300	ring-exported protein 3	1113	-593.833333
S01 075	56	F	PFI1755c.2o2	PF3D7_0936300	ring-exported protein 3	775.5	-279.666667
S01 076	28	F	PFI1755c.2o2	PF3D7_0936300	ring-exported protein 3	742	29.333333
S01 077	64	F	PFI1755c.2o2	PF3D7_0936300	ring-exported protein 3	1668.5	-418.833333
S01 078	65	F	PFI1755c.2o2	PF3D7_0936300	ring-exported protein 3	7422.5	709
S01 079	12	M	PFI1755c.2o2	PF3D7_0936300	ring-exported protein 3	-663.333333	-713.5
S01 080	41	M	PFI1755c.2o2	PF3D7_0936300	ring-exported protein 3	3283.333333	1202.5
S01 081	8	M	PFI1755c.2o2	PF3D7_0936300	ring-exported protein 3	-64.5	-663.666667
S01 082	7	M	PFI1755c.2o2	PF3D7_0936300	ring-exported protein 3	-1068	-477
S01 083	7	M	PFI1755c.2o2	PF3D7_0936300	ring-exported protein 3	-727.166667	495.333333
S01 084	7	M	PFI1755c.2o2	PF3D7_0936300	ring-exported protein 3	83.833333	-525.333333
S01 085	7	M	PFI1755c.2o2	PF3D7_0936300	ring-exported protein 3	-471.5	-683.5
S01 086	8	F	PFI1755c.2o2	PF3D7_0936300	ring-exported protein 3	7340	-302.333333
S01 087	7	F	PFI1755c.2o2	PF3D7_0936300	ring-exported protein 3	-403.5	-1069.5
S01 088	8	M	PFI1755c.2o2	PF3D7_0936300	ring-exported protein 3	699.666667	-69.166667
S01 089	11	M	PFI1755c.2o2	PF3D7_0936300	ring-exported protein 3	4	-2627.333333
S01 090	9	M	PFI1755c.2o2	PF3D7_0936300	ring-exported protein 3	-249	-885.833333
S01 091	8	M	PFI1755c.2o2	PF3D7_0936300	ring-exported protein 3	-4178.166667	-162.166667
S01 092	8	F	PFI1755c.2o2	PF3D7_0936300	ring-exported protein 3	69.166667	-520
S01 093	9	F	PFI1755c.2o2	PF3D7_0936300	ring-exported protein 3	36.333333	-1203.333333
S01 094	8	F	PFI1755c.2o2	PF3D7_0936300	ring-exported protein 3	-811	-2489.5
S01 095	12	M	PFI1755c.2o2	PF3D7_0936300	ring-exported protein 3	-174.833333	-2892.666667
S01 096	12	F	PFI1755c.2o2	PF3D7_0936300	ring-exported protein 3	-425	-5632.666667
S01 097	12	F	PFI1755c.2o2	PF3D7_0936300	ring-exported protein 3	-1039.166667	-106.666667
S01 098	10	F	PFI1755c.2o2	PF3D7_0936300	ring-exported protein 3	-2529	-3125.5
S01 099	11	F	PFI1755c.2o2	PF3D7_0936300	ring-exported protein 3	-75	269
S01 100	10	F	PFI1755c.2o2	PF3D7_0936300	ring-exported protein 3	-625.5	-2997.166667
S01 001	84	F	MAL7P1.77e1s1	PF3D7_0716300	conserved protein, unknown function	3936.166667	2449
S01 002	54	F	MAL7P1.77e1s1	PF3D7_0716300	conserved protein, unknown function	1627.833333	270.833333
S01 003	50	F	MAL7P1.77e1s1	PF3D7_0716300	conserved protein, unknown function	2986.333333	179
S01 004	24	F	MAL7P1.77e1s1	PF3D7_0716300	conserved protein, unknown function	2767.166667	316.5
S01 005	14	M	MAL7P1.77e1s1	PF3D7_0716300	conserved protein, unknown function	1966.5	-72.166667
S01 006	13	M	MAL7P1.77e1s1	PF3D7_0716300	conserved protein, unknown function	-1492.5	-151
S01 007	65	F	MAL7P1.77e1s1	PF3D7_0716300	conserved protein, unknown function	10918.83333	3265.166667
S01 008	70	F	MAL7P1.77e1s1	PF3D7_0716300	conserved protein, unknown function	1321.666667	-331.5
S01 009	45	M	MAL7P1.77e1s1	PF3D7_0716300	conserved protein, unknown function	5123.166667	3844.5
S01 010	2	M	MAL7P1.77e1s1	PF3D7_0716300	conserved protein, unknown function	-384	187.166667
S01 011	68	F	MAL7P1.77e1s1	PF3D7_0716300	conserved protein, unknown function	4602.666667	568.833333
S01 012	66	F	MAL7P1.77e1s1	PF3D7_0716300	conserved protein, unknown function	603.666667	645.666667
S01 013	69	F	MAL7P1.77e1s1	PF3D7_0716300	conserved protein, unknown function	2992.333333	548.166667
S01 014	45	F	MAL7P1.77e1s1	PF3D7_0716300	conserved protein, unknown function	6338	-120.333333
S01 015	3	M	MAL7P1.77e1s1	PF3D7_0716300	conserved protein, unknown function	-186.166667	-926.5
S01 016	32	F	MAL7P1.77e1s1	PF3D7_0716300	conserved protein, unknown function	3806.333333	-147.666667
S01 017	57	F	MAL7P1.77e1s1	PF3D7_0716300	conserved protein, unknown function	4207.833333	-106.833333
S01 018	2	F	MAL7P1.77e1s1	PF3D7_0716300	conserved protein, unknown function	-1069.166667	-271.666667
S01 019	10	F	MAL7P1.77e1s1	PF3D7_0716300	conserved protein, unknown function	533.833333	-1266.833333
S01 020	68	F	MAL7P1.77e1s1	PF3D7_0716300	conserved protein, unknown function	14280	6773.833333
S01 021	17	F	MAL7P1.77e1s1	PF3D7_0716300	conserved protein, unknown function	-1596	-383.166667
S01 022	56	F	MAL7P1.77e1s1	PF3D7_0716300	conserved protein, unknown function	329.833333	258.333333
S01 023	20	M	MAL7P1.77e1s1	PF3D7_0716300	conserved protein, unknown function	344.833333	-938.833333
S01 024	15	M	MAL7P1.77e1s1	PF3D7_0716300	conserved protein, unknown function	1347.333333	148.5
S01 025	68	F	MAL7P1.77e1s1	PF3D7_0716300	conserved protein, unknown function	13581.83333	892
S01 026	13	F	MAL7P1.77e1s1	PF3D7_0716300	conserved protein, unknown function	186.333333	-1161.166667
S01 027	54	F	MAL7P1.77e1s1	PF3D7_0716300	conserved protein, unknown function	427	-560.666667
S01 028	19	F	MAL7P1.77e1s1	PF3D7_0716300	conserved protein, unknown function	10039.33333	487.5
S01 029	67	F	MAL7P1.77e1s1	PF3D7_0716300	conserved protein, unknown function	13795	7978.666667
S01 030	59	F	MAL7P1.77e1s1	PF3D7_0716300	conserved protein, unknown function	7962.166667	1292.833333
S01 031	68	M	MAL7P1.77e1s1	PF3D7_0716300	conserved protein, unknown function	6021.333333	-744.333333
S01 032	63	M	MAL7P1.77e1s1	PF3D7_0716300	conserved protein, unknown function	5818.833333	1867
S01 033	39	F	MAL7P1.77e1s1	PF3D7_0716300	conserved protein, unknown function	2318.5	-123.166667
S01 034	36	F	MAL7P1.77e1s1	PF3D7_0716300	conserved protein, unknown function	7687.333333	-1007.5
S01 035	31	F	MAL7P1.77e1s1	PF3D7_0716300	conserved protein, unknown function	-1456.666667	1107.333333
S01 036	63	F	MAL7P1.77e1s1	PF3D7_0716300	conserved protein, unknown function	7743	-198.333333
S01 037	48	F	MAL7P1.77e1s1	PF3D7_0716300	conserved protein, unknown function	-987.833333	1045.5
S01 038	68	F	MAL7P1.77e1s1	PF3D7_0716300	conserved protein, unknown function	2004.833333	-299.833333
S01 039	52	F	MAL7P1.77e1s1	PF3D7_0716300	conserved protein, unknown function	9271.5	2051.166667
S01 040	35	F	MAL7P1.77e1s1	PF3D7_0716300	conserved protein, unknown function	1375	-189.666667
S01 041	55	F	MAL7P1.77e1s1	PF3D7_0716300	conserved protein, unknown function	1151.666667	302.833333
S01 042	44	F	MAL7P1.77e1s1	PF3D7_0716300	conserved protein, unknown function	1715.666667	-386.166667
S01 043	69	F	MAL7P1.77e1s1	PF3D7_0716300	conserved protein, unknown function	276.166667	1902.666667
S01 044	34	M	MAL7P1.77e1s1	PF3D7_0716300	conserved protein, unknown function	14525.66667	6997.333333
S01 045	68	M	MAL7P1.77e1s1	PF3D7_0716300	conserved protein, unknown function	-693.5	2227.5
S01 046	56	M	MAL7P1.77e1s1	PF3D7_0716300	conserved protein, unknown function	4841.666667	697.5
S01 047	58	M	MAL7P1.77e1s1	PF3D7_0716300	conserved protein, unknown function	10132.16667	1442.333333
S01 048	35	M	MAL7P1.77e1s1	PF3D7_0716300	conserved protein, unknown function	1559.166667	-175.833333
S01 049	59	M	MAL7P1.77e1s1	PF3D7_0716300	conserved protein, unknown function	1234.833333	861.166667
S01 050	31	M	MAL7P1.77e1s1	PF3D7_0716300	conserved protein, unknown function	9693.333333	10090.5
S01 051	23	F	MAL7P1.77e1s1	PF3D7_0716300	conserved protein, unknown function	1582.333333	390.5
S01 052	2	F	MAL7P1.77e1s1	PF3D7_0716300	conserved protein, unknown function	-471.833333	92.666667
S01 053	68	M	MAL7P1.77e1s1	PF3D7_0716300	conserved protein, unknown function	258.333333	1225.333333
S01 054	73	M	MAL7P1.77e1s1	PF3D7_0716300	conserved protein, unknown function	11701.5	1729.5
S01 055	41	F	MAL7P1.77e1s1	PF3D7_0716300	conserved protein, unknown function	4248.333333	506.666667
S01 056	56	F	MAL7P1.77e1s1	PF3D7_0716300	conserved protein, unknown function	-428.666667	0.166667
S01 057	37	F	MAL7P1.77e1s1	PF3D7_0716300	conserved protein, unknown function	6186	1770.333333
S01 058	48	F	MAL7P1.77e1s1	PF3D7_0716300	conserved protein, unknown function	2838.833333	-141.5
S01 059	27	F	MAL7P1.77e1s1	PF3D7_0716300	conserved protein, unknown function	1437	-417.166667
S01 060	16	F	MAL7P1.77e1s1	PF3D7_0716300	conserved protein, unknown function	7542	-622.666667
S01 061	47	F	MAL7P1.77e1s1	PF3D7_0716300	conserved protein, unknown function	624.5	-1847.666667
S01 062	14	M	MAL7P1.77e1s1	PF3D7_0716300	conserved protein, unknown function	-169.666667	-1938.833333
S01 063	32	F	MAL7P1.77e1s1	PF3D7_0716300	conserved protein, unknown function	4164.666667	196.166667
S01 064	31	F	MAL7P1.77e1s1	PF3D7_0716300	conserved protein, unknown function	2233.833333	45.833333
S01 065	15	F	MAL7P1.77e1s1	PF3D7_0716300	conserved protein, unknown function	543.666667	-2085
S01 066	60	F	MAL7P1.77e1s1	PF3D7_0716300	conserved protein, unknown function	2229.333333	-871.166667
S01 067	25	F	MAL7P1.77e1s1	PF3D7_0716300	conserved protein, unknown function	7058	-877
S01 068	54	M	MAL7P1.77e1s1	PF3D7_0716300	conserved protein, unknown function	5549.166667	1669.833333
S01 069	38	F	MAL7P1.77e1s1	PF3D7_0716300	conserved protein, unknown function	3043.166667	1237.666667
S01 070	30	F	MAL7P1.77e1s1	PF3D7_0716300	conserved protein, unknown function	4280.5	1876
S01 071	37	F	MAL7P1.77e1s1	PF3D7_0716300	conserved protein, unknown function	3048.166667	2.666667
S01 072	36	M	MAL7P1.77e1s1	PF3D7_0716300	conserved protein, unknown function	13291.33333	3039.166667
S01 073	48	M	MAL7P1.77e1s1	PF3D7_0716300	conserved protein, unknown function	2010.5	-509.833333
S01 074	28	F	MAL7P1.77e1s1	PF3D7_0716300	conserved protein, unknown function	13370	6608.166667
S01 075	56	F	MAL7P1.77e1s1	PF3D7_0716300	conserved protein, unknown function	1370.5	249.333333
S01 076	28	F	MAL7P1.77e1s1	PF3D7_0716300	conserved protein, unknown function	1255	585.333333
S01 077	64	F	MAL7P1.77e1s1	PF3D7_0716300	conserved protein, unknown function	4109.5	36.166667
S01 078	65	F	MAL7P1.77e1s1	PF3D7_0716300	conserved protein, unknown function	7261.5	2511
S01 079	12	M	MAL7P1.77e1s1	PF3D7_0716300	conserved protein, unknown function	792.666667	-179.5
S01 080	41	M	MAL7P1.77e1s1	PF3D7_0716300	conserved protein, unknown function	4256.333333	25.5
S01 081	8	M	MAL7P1.77e1s1	PF3D7_0716300	conserved protein, unknown function	514.5	-134.666667
S01 082	7	M	MAL7P1.77e1s1	PF3D7_0716300	conserved protein, unknown function	157	-82
S01 083	7	M	MAL7P1.77e1s1	PF3D7_0716300	conserved protein, unknown function	-255.166667	784.333333
S01 084	7	M	MAL7P1.77e1s1	PF3D7_0716300	conserved protein, unknown function	269.833333	80.666667
S01 085	7	M	MAL7P1.77e1s1	PF3D7_0716300	conserved protein, unknown function	-382.5	-494.5
S01 086	8	F	MAL7P1.77e1s1	PF3D7_0716300	conserved protein, unknown function	7361	2360.666667
S01 087	7	F	MAL7P1.77e1s1	PF3D7_0716300	conserved protein, unknown function	1219.5	-68.5
S01 088	8	M	MAL7P1.77e1s1	PF3D7_0716300	conserved protein, unknown function	240.666667	-145.166667
S01 089	11	M	MAL7P1.77e1s1	PF3D7_0716300	conserved protein, unknown function	13981	-309.333333
S01 090	9	M	MAL7P1.77e1s1	PF3D7_0716300	conserved protein, unknown function	-74	-870.833333
S01 091	8	M	MAL7P1.77e1s1	PF3D7_0716300	conserved protein, unknown function	-2965.166667	-498.166667
S01 092	8	F	MAL7P1.77e1s1	PF3D7_0716300	conserved protein, unknown function	16810.16667	685
S01 093	9	F	MAL7P1.77e1s1	PF3D7_0716300	conserved protein, unknown function	15.333333	73.666667
S01 094	8	F	MAL7P1.77e1s1	PF3D7_0716300	conserved protein, unknown function	691	-2179.5
S01 095	12	M	MAL7P1.77e1s1	PF3D7_0716300	conserved protein, unknown function	181.166667	-1727.666667
S01 096	12	F	MAL7P1.77e1s1	PF3D7_0716300	conserved protein, unknown function	685	-4936.666667
S01 097	12	F	MAL7P1.77e1s1	PF3D7_0716300	conserved protein, unknown function	-555.166667	-338.666667
S01 098	10	F	MAL7P1.77e1s1	PF3D7_0716300	conserved protein, unknown function	-1154	-3574.5
S01 099	11	F	MAL7P1.77e1s1	PF3D7_0716300	conserved protein, unknown function	966	-482
S01 100	10	F	MAL7P1.77e1s1	PF3D7_0716300	conserved protein, unknown function	-1101.5	-1807.166667
S01 001	84	F	PF08_0005	PF3D7_0830300	sporozoite invasion-associated protein 2	580.166667	1849
S01 002	54	F	PF08_0005	PF3D7_0830300	sporozoite invasion-associated protein 2	285.833333	-314.166667
S01 003	50	F	PF08_0005	PF3D7_0830300	sporozoite invasion-associated protein 2	2257.333333	-124
S01 004	24	F	PF08_0005	PF3D7_0830300	sporozoite invasion-associated protein 2	234.166667	-772.5
S01 005	14	M	PF08_0005	PF3D7_0830300	sporozoite invasion-associated protein 2	-2041.5	-985.166667
S01 006	13	M	PF08_0005	PF3D7_0830300	sporozoite invasion-associated protein 2	-764.5	-764
S01 007	65	F	PF08_0005	PF3D7_0830300	sporozoite invasion-associated protein 2	5082.833333	-380.833333
S01 008	70	F	PF08_0005	PF3D7_0830300	sporozoite invasion-associated protein 2	2152.666667	-1522.5
S01 009	45	M	PF08_0005	PF3D7_0830300	sporozoite invasion-associated protein 2	4746.166667	-1068.5
S01 010	2	M	PF08_0005	PF3D7_0830300	sporozoite invasion-associated protein 2	-899	-205.833333
S01 011	68	F	PF08_0005	PF3D7_0830300	sporozoite invasion-associated protein 2	-177.333333	-340.166667
S01 012	66	F	PF08_0005	PF3D7_0830300	sporozoite invasion-associated protein 2	443.666667	-334.333333
S01 013	69	F	PF08_0005	PF3D7_0830300	sporozoite invasion-associated protein 2	-4099.666667	-844.833333
S01 014	45	F	PF08_0005	PF3D7_0830300	sporozoite invasion-associated protein 2	1323	-868.333333
S01 015	3	M	PF08_0005	PF3D7_0830300	sporozoite invasion-associated protein 2	-1301.166667	-1572.5
S01 016	32	F	PF08_0005	PF3D7_0830300	sporozoite invasion-associated protein 2	509.333333	-39.666667
S01 017	57	F	PF08_0005	PF3D7_0830300	sporozoite invasion-associated protein 2	3063.833333	-458.833333
S01 018	2	F	PF08_0005	PF3D7_0830300	sporozoite invasion-associated protein 2	-981.166667	-754.666667
S01 019	10	F	PF08_0005	PF3D7_0830300	sporozoite invasion-associated protein 2	1354.833333	-676.833333
S01 020	68	F	PF08_0005	PF3D7_0830300	sporozoite invasion-associated protein 2	1915	317.833333
S01 021	17	F	PF08_0005	PF3D7_0830300	sporozoite invasion-associated protein 2	-82	-1250.166667
S01 022	56	F	PF08_0005	PF3D7_0830300	sporozoite invasion-associated protein 2	3409.833333	-1333.666667
S01 023	20	M	PF08_0005	PF3D7_0830300	sporozoite invasion-associated protein 2	26.833333	-4987.833333
S01 024	15	M	PF08_0005	PF3D7_0830300	sporozoite invasion-associated protein 2	837.333333	-233.5
S01 025	68	F	PF08_0005	PF3D7_0830300	sporozoite invasion-associated protein 2	-80.166667	-842
S01 026	13	F	PF08_0005	PF3D7_0830300	sporozoite invasion-associated protein 2	102.333333	-477.166667
S01 027	54	F	PF08_0005	PF3D7_0830300	sporozoite invasion-associated protein 2	-162	-794.666667
S01 028	19	F	PF08_0005	PF3D7_0830300	sporozoite invasion-associated protein 2	-40.666667	681.5
S01 029	67	F	PF08_0005	PF3D7_0830300	sporozoite invasion-associated protein 2	4306	1541.666667
S01 030	59	F	PF08_0005	PF3D7_0830300	sporozoite invasion-associated protein 2	1115.166667	-164.166667
S01 031	68	M	PF08_0005	PF3D7_0830300	sporozoite invasion-associated protein 2	5518.333333	-3620.333333
S01 032	63	M	PF08_0005	PF3D7_0830300	sporozoite invasion-associated protein 2	7647.833333	-1014
S01 033	39	F	PF08_0005	PF3D7_0830300	sporozoite invasion-associated protein 2	-556.5	-535.166667
S01 034	36	F	PF08_0005	PF3D7_0830300	sporozoite invasion-associated protein 2	793.333333	-958.5
S01 035	31	F	PF08_0005	PF3D7_0830300	sporozoite invasion-associated protein 2	-1552.666667	-758.666667
S01 036	63	F	PF08_0005	PF3D7_0830300	sporozoite invasion-associated protein 2	942	-312.333333
S01 037	48	F	PF08_0005	PF3D7_0830300	sporozoite invasion-associated protein 2	1717.166667	286.5
S01 038	68	F	PF08_0005	PF3D7_0830300	sporozoite invasion-associated protein 2	3347.833333	-596.833333
S01 039	52	F	PF08_0005	PF3D7_0830300	sporozoite invasion-associated protein 2	9450.5	-1004.833333
S01 040	35	F	PF08_0005	PF3D7_0830300	sporozoite invasion-associated protein 2	2177	1124.333333
S01 041	55	F	PF08_0005	PF3D7_0830300	sporozoite invasion-associated protein 2	-613.333333	296.833333
S01 042	44	F	PF08_0005	PF3D7_0830300	sporozoite invasion-associated protein 2	1748.666667	249.833333
S01 043	69	F	PF08_0005	PF3D7_0830300	sporozoite invasion-associated protein 2	-330.833333	798.666667
S01 044	34	M	PF08_0005	PF3D7_0830300	sporozoite invasion-associated protein 2	1042.666667	-313.666667
S01 045	68	M	PF08_0005	PF3D7_0830300	sporozoite invasion-associated protein 2	135.5	2663.5
S01 046	56	M	PF08_0005	PF3D7_0830300	sporozoite invasion-associated protein 2	919.666667	-231.5
S01 047	58	M	PF08_0005	PF3D7_0830300	sporozoite invasion-associated protein 2	9926.166667	292.333333
S01 048	35	M	PF08_0005	PF3D7_0830300	sporozoite invasion-associated protein 2	591.166667	-103.833333
S01 049	59	M	PF08_0005	PF3D7_0830300	sporozoite invasion-associated protein 2	75.833333	221.166667
S01 050	31	M	PF08_0005	PF3D7_0830300	sporozoite invasion-associated protein 2	2851.333333	825.5
S01 051	23	F	PF08_0005	PF3D7_0830300	sporozoite invasion-associated protein 2	547.333333	-224.5
S01 052	2	F	PF08_0005	PF3D7_0830300	sporozoite invasion-associated protein 2	-335.833333	812.666667
S01 053	68	M	PF08_0005	PF3D7_0830300	sporozoite invasion-associated protein 2	505.333333	421.333333
S01 054	73	M	PF08_0005	PF3D7_0830300	sporozoite invasion-associated protein 2	6045.5	-379.5
S01 055	41	F	PF08_0005	PF3D7_0830300	sporozoite invasion-associated protein 2	2891.333333	683.666667
S01 056	56	F	PF08_0005	PF3D7_0830300	sporozoite invasion-associated protein 2	100.333333	-359.833333
S01 057	37	F	PF08_0005	PF3D7_0830300	sporozoite invasion-associated protein 2	-352	982.333333
S01 058	48	F	PF08_0005	PF3D7_0830300	sporozoite invasion-associated protein 2	8327.833333	369.5
S01 059	27	F	PF08_0005	PF3D7_0830300	sporozoite invasion-associated protein 2	1434	-1179.166667
S01 060	16	F	PF08_0005	PF3D7_0830300	sporozoite invasion-associated protein 2	2124	-95.666667
S01 061	47	F	PF08_0005	PF3D7_0830300	sporozoite invasion-associated protein 2	427.5	-2920.666667
S01 062	14	M	PF08_0005	PF3D7_0830300	sporozoite invasion-associated protein 2	934.333333	696.166667
S01 063	32	F	PF08_0005	PF3D7_0830300	sporozoite invasion-associated protein 2	257.666667	-942.833333
S01 064	31	F	PF08_0005	PF3D7_0830300	sporozoite invasion-associated protein 2	571.833333	-190.166667
S01 065	15	F	PF08_0005	PF3D7_0830300	sporozoite invasion-associated protein 2	886.666667	-1759
S01 066	60	F	PF08_0005	PF3D7_0830300	sporozoite invasion-associated protein 2	930.333333	-1783.166667
S01 067	25	F	PF08_0005	PF3D7_0830300	sporozoite invasion-associated protein 2	878	-2168
S01 068	54	M	PF08_0005	PF3D7_0830300	sporozoite invasion-associated protein 2	1131.166667	8.833333
S01 069	38	F	PF08_0005	PF3D7_0830300	sporozoite invasion-associated protein 2	1976.166667	2.666667
S01 070	30	F	PF08_0005	PF3D7_0830300	sporozoite invasion-associated protein 2	4099.5	-1040
S01 071	37	F	PF08_0005	PF3D7_0830300	sporozoite invasion-associated protein 2	-737.833333	901.666667
S01 072	36	M	PF08_0005	PF3D7_0830300	sporozoite invasion-associated protein 2	3178.333333	619.166667
S01 073	48	M	PF08_0005	PF3D7_0830300	sporozoite invasion-associated protein 2	350.5	-567.833333
S01 074	28	F	PF08_0005	PF3D7_0830300	sporozoite invasion-associated protein 2	-305	-340.833333
S01 075	56	F	PF08_0005	PF3D7_0830300	sporozoite invasion-associated protein 2	51.5	-604.666667
S01 076	28	F	PF08_0005	PF3D7_0830300	sporozoite invasion-associated protein 2	177	301.333333
S01 077	64	F	PF08_0005	PF3D7_0830300	sporozoite invasion-associated protein 2	326.5	-687.833333
S01 078	65	F	PF08_0005	PF3D7_0830300	sporozoite invasion-associated protein 2	8685.5	89
S01 079	12	M	PF08_0005	PF3D7_0830300	sporozoite invasion-associated protein 2	-1004.333333	36.5
S01 080	41	M	PF08_0005	PF3D7_0830300	sporozoite invasion-associated protein 2	1456.333333	307.5
S01 081	8	M	PF08_0005	PF3D7_0830300	sporozoite invasion-associated protein 2	48.5	-1979.666667
S01 082	7	M	PF08_0005	PF3D7_0830300	sporozoite invasion-associated protein 2	-843	-584
S01 083	7	M	PF08_0005	PF3D7_0830300	sporozoite invasion-associated protein 2	-412.166667	-175.666667
S01 084	7	M	PF08_0005	PF3D7_0830300	sporozoite invasion-associated protein 2	121.833333	-545.333333
S01 085	7	M	PF08_0005	PF3D7_0830300	sporozoite invasion-associated protein 2	1673.5	-741.5
S01 086	8	F	PF08_0005	PF3D7_0830300	sporozoite invasion-associated protein 2	8466	-67.333333
S01 087	7	F	PF08_0005	PF3D7_0830300	sporozoite invasion-associated protein 2	-417.5	-744.5
S01 088	8	M	PF08_0005	PF3D7_0830300	sporozoite invasion-associated protein 2	1425.666667	-971.166667
S01 089	11	M	PF08_0005	PF3D7_0830300	sporozoite invasion-associated protein 2	-327	-1087.333333
S01 090	9	M	PF08_0005	PF3D7_0830300	sporozoite invasion-associated protein 2	-170	-496.833333
S01 091	8	M	PF08_0005	PF3D7_0830300	sporozoite invasion-associated protein 2	-4994.166667	-31.166667
S01 092	8	F	PF08_0005	PF3D7_0830300	sporozoite invasion-associated protein 2	572.166667	483
S01 093	9	F	PF08_0005	PF3D7_0830300	sporozoite invasion-associated protein 2	1190.333333	-1361.333333
S01 094	8	F	PF08_0005	PF3D7_0830300	sporozoite invasion-associated protein 2	-925	-1567.5
S01 095	12	M	PF08_0005	PF3D7_0830300	sporozoite invasion-associated protein 2	282.166667	-1803.666667
S01 096	12	F	PF08_0005	PF3D7_0830300	sporozoite invasion-associated protein 2	785	-4292.666667
S01 097	12	F	PF08_0005	PF3D7_0830300	sporozoite invasion-associated protein 2	1019.833333	715.333333
S01 098	10	F	PF08_0005	PF3D7_0830300	sporozoite invasion-associated protein 2	-1778	-1484.5
S01 099	11	F	PF08_0005	PF3D7_0830300	sporozoite invasion-associated protein 2	3006	37
S01 100	10	F	PF08_0005	PF3D7_0830300	sporozoite invasion-associated protein 2	-314.5	-741.166667
S01 001	84	F	PF10_0138-s1	PF3D7_1014100	merozoite surface protein MSA180, putative	6693.166667	3184
S01 002	54	F	PF10_0138-s1	PF3D7_1014100	merozoite surface protein MSA180, putative	12348.83333	5823.833333
S01 003	50	F	PF10_0138-s1	PF3D7_1014100	merozoite surface protein MSA180, putative	2538.333333	940
S01 004	24	F	PF10_0138-s1	PF3D7_1014100	merozoite surface protein MSA180, putative	5440.166667	1361.5
S01 005	14	M	PF10_0138-s1	PF3D7_1014100	merozoite surface protein MSA180, putative	12851.5	2546.833333
S01 006	13	M	PF10_0138-s1	PF3D7_1014100	merozoite surface protein MSA180, putative	1258.5	841
S01 007	65	F	PF10_0138-s1	PF3D7_1014100	merozoite surface protein MSA180, putative	11532.83333	9609.166667
S01 008	70	F	PF10_0138-s1	PF3D7_1014100	merozoite surface protein MSA180, putative	3571.666667	4171.5
S01 009	45	M	PF10_0138-s1	PF3D7_1014100	merozoite surface protein MSA180, putative	4274.166667	2949.5
S01 010	2	M	PF10_0138-s1	PF3D7_1014100	merozoite surface protein MSA180, putative	-435	945.166667
S01 011	68	F	PF10_0138-s1	PF3D7_1014100	merozoite surface protein MSA180, putative	4548.666667	1380.833333
S01 012	66	F	PF10_0138-s1	PF3D7_1014100	merozoite surface protein MSA180, putative	13942.66667	5144.666667
S01 013	69	F	PF10_0138-s1	PF3D7_1014100	merozoite surface protein MSA180, putative	9265.333333	1160.166667
S01 014	45	F	PF10_0138-s1	PF3D7_1014100	merozoite surface protein MSA180, putative	10428	12704.66667
S01 015	3	M	PF10_0138-s1	PF3D7_1014100	merozoite surface protein MSA180, putative	1267.833333	1424.5
S01 016	32	F	PF10_0138-s1	PF3D7_1014100	merozoite surface protein MSA180, putative	8111.333333	2903.333333
S01 017	57	F	PF10_0138-s1	PF3D7_1014100	merozoite surface protein MSA180, putative	13620.83333	14129.16667
S01 018	2	F	PF10_0138-s1	PF3D7_1014100	merozoite surface protein MSA180, putative	438.833333	-372.666667
S01 019	10	F	PF10_0138-s1	PF3D7_1014100	merozoite surface protein MSA180, putative	1134.833333	1165.166667
S01 020	68	F	PF10_0138-s1	PF3D7_1014100	merozoite surface protein MSA180, putative	12958	4855.833333
S01 021	17	F	PF10_0138-s1	PF3D7_1014100	merozoite surface protein MSA180, putative	1647	1802.833333
S01 022	56	F	PF10_0138-s1	PF3D7_1014100	merozoite surface protein MSA180, putative	11192.83333	12652.33333
S01 023	20	M	PF10_0138-s1	PF3D7_1014100	merozoite surface protein MSA180, putative	8057.833333	1237.166667
S01 024	15	M	PF10_0138-s1	PF3D7_1014100	merozoite surface protein MSA180, putative	8688.333333	3049.5
S01 025	68	F	PF10_0138-s1	PF3D7_1014100	merozoite surface protein MSA180, putative	14518.83333	8913
S01 026	13	F	PF10_0138-s1	PF3D7_1014100	merozoite surface protein MSA180, putative	1086.333333	1209.833333
S01 027	54	F	PF10_0138-s1	PF3D7_1014100	merozoite surface protein MSA180, putative	11458	8051.333333
S01 028	19	F	PF10_0138-s1	PF3D7_1014100	merozoite surface protein MSA180, putative	2223.333333	2015.5
S01 029	67	F	PF10_0138-s1	PF3D7_1014100	merozoite surface protein MSA180, putative	14258	9149.666667
S01 030	59	F	PF10_0138-s1	PF3D7_1014100	merozoite surface protein MSA180, putative	9746.166667	8003.833333
S01 031	68	M	PF10_0138-s1	PF3D7_1014100	merozoite surface protein MSA180, putative	5416.333333	330.666667
S01 032	63	M	PF10_0138-s1	PF3D7_1014100	merozoite surface protein MSA180, putative	9781.833333	4131
S01 033	39	F	PF10_0138-s1	PF3D7_1014100	merozoite surface protein MSA180, putative	6900.5	1267.833333
S01 034	36	F	PF10_0138-s1	PF3D7_1014100	merozoite surface protein MSA180, putative	10576.33333	1693.5
S01 035	31	F	PF10_0138-s1	PF3D7_1014100	merozoite surface protein MSA180, putative	5241.333333	6871.333333
S01 036	63	F	PF10_0138-s1	PF3D7_1014100	merozoite surface protein MSA180, putative	6271	-224.333333
S01 037	48	F	PF10_0138-s1	PF3D7_1014100	merozoite surface protein MSA180, putative	4174.166667	302.5
S01 038	68	F	PF10_0138-s1	PF3D7_1014100	merozoite surface protein MSA180, putative	6161.833333	1719.166667
S01 039	52	F	PF10_0138-s1	PF3D7_1014100	merozoite surface protein MSA180, putative	10211.5	11079.16667
S01 040	35	F	PF10_0138-s1	PF3D7_1014100	merozoite surface protein MSA180, putative	2431	-1327.666667
S01 041	55	F	PF10_0138-s1	PF3D7_1014100	merozoite surface protein MSA180, putative	5766.666667	3134.833333
S01 042	44	F	PF10_0138-s1	PF3D7_1014100	merozoite surface protein MSA180, putative	11952.66667	6542.833333
S01 043	69	F	PF10_0138-s1	PF3D7_1014100	merozoite surface protein MSA180, putative	7017.166667	2962.666667
S01 044	34	M	PF10_0138-s1	PF3D7_1014100	merozoite surface protein MSA180, putative	2480.666667	-631.666667
S01 045	68	M	PF10_0138-s1	PF3D7_1014100	merozoite surface protein MSA180, putative	-9.5	2827.5
S01 046	56	M	PF10_0138-s1	PF3D7_1014100	merozoite surface protein MSA180, putative	16491.66667	8997.5
S01 047	58	M	PF10_0138-s1	PF3D7_1014100	merozoite surface protein MSA180, putative	6034.166667	1643.333333
S01 048	35	M	PF10_0138-s1	PF3D7_1014100	merozoite surface protein MSA180, putative	9377.166667	3411.166667
S01 049	59	M	PF10_0138-s1	PF3D7_1014100	merozoite surface protein MSA180, putative	11709.83333	2874.166667
S01 050	31	M	PF10_0138-s1	PF3D7_1014100	merozoite surface protein MSA180, putative	11045.33333	7155.5
S01 051	23	F	PF10_0138-s1	PF3D7_1014100	merozoite surface protein MSA180, putative	11853.33333	4003.5
S01 052	2	F	PF10_0138-s1	PF3D7_1014100	merozoite surface protein MSA180, putative	33.166667	824.666667
S01 053	68	M	PF10_0138-s1	PF3D7_1014100	merozoite surface protein MSA180, putative	1715.333333	259.333333
S01 054	73	M	PF10_0138-s1	PF3D7_1014100	merozoite surface protein MSA180, putative	8945.5	4016.5
S01 055	41	F	PF10_0138-s1	PF3D7_1014100	merozoite surface protein MSA180, putative	16055.33333	9672.666667
S01 056	56	F	PF10_0138-s1	PF3D7_1014100	merozoite surface protein MSA180, putative	16602.33333	17100.16667
S01 057	37	F	PF10_0138-s1	PF3D7_1014100	merozoite surface protein MSA180, putative	9686	2890.333333
S01 058	48	F	PF10_0138-s1	PF3D7_1014100	merozoite surface protein MSA180, putative	15523.83333	12803.5
S01 059	27	F	PF10_0138-s1	PF3D7_1014100	merozoite surface protein MSA180, putative	9415	2037.833333
S01 060	16	F	PF10_0138-s1	PF3D7_1014100	merozoite surface protein MSA180, putative	6042	745.333333
S01 061	47	F	PF10_0138-s1	PF3D7_1014100	merozoite surface protein MSA180, putative	14685.5	8395.333333
S01 062	14	M	PF10_0138-s1	PF3D7_1014100	merozoite surface protein MSA180, putative	1599.333333	691.166667
S01 063	32	F	PF10_0138-s1	PF3D7_1014100	merozoite surface protein MSA180, putative	2225.666667	96.166667
S01 064	31	F	PF10_0138-s1	PF3D7_1014100	merozoite surface protein MSA180, putative	15723.83333	12140.83333
S01 065	15	F	PF10_0138-s1	PF3D7_1014100	merozoite surface protein MSA180, putative	4649.666667	359
S01 066	60	F	PF10_0138-s1	PF3D7_1014100	merozoite surface protein MSA180, putative	3052.333333	-189.166667
S01 067	25	F	PF10_0138-s1	PF3D7_1014100	merozoite surface protein MSA180, putative	8985	2793
S01 068	54	M	PF10_0138-s1	PF3D7_1014100	merozoite surface protein MSA180, putative	12783.16667	9491.833333
S01 069	38	F	PF10_0138-s1	PF3D7_1014100	merozoite surface protein MSA180, putative	11186.16667	4675.666667
S01 070	30	F	PF10_0138-s1	PF3D7_1014100	merozoite surface protein MSA180, putative	3538.5	2365
S01 071	37	F	PF10_0138-s1	PF3D7_1014100	merozoite surface protein MSA180, putative	7336.166667	1751.666667
S01 072	36	M	PF10_0138-s1	PF3D7_1014100	merozoite surface protein MSA180, putative	8910.333333	2396.166667
S01 073	48	M	PF10_0138-s1	PF3D7_1014100	merozoite surface protein MSA180, putative	15278.5	8154.166667
S01 074	28	F	PF10_0138-s1	PF3D7_1014100	merozoite surface protein MSA180, putative	5157	1594.166667
S01 075	56	F	PF10_0138-s1	PF3D7_1014100	merozoite surface protein MSA180, putative	10905.5	3264.333333
S01 076	28	F	PF10_0138-s1	PF3D7_1014100	merozoite surface protein MSA180, putative	8800	3922.333333
S01 077	64	F	PF10_0138-s1	PF3D7_1014100	merozoite surface protein MSA180, putative	13203.5	2810.166667
S01 078	65	F	PF10_0138-s1	PF3D7_1014100	merozoite surface protein MSA180, putative	9101.5	14337
S01 079	12	M	PF10_0138-s1	PF3D7_1014100	merozoite surface protein MSA180, putative	1611.666667	459.5
S01 080	41	M	PF10_0138-s1	PF3D7_1014100	merozoite surface protein MSA180, putative	10097.33333	3388.5
S01 081	8	M	PF10_0138-s1	PF3D7_1014100	merozoite surface protein MSA180, putative	1335.5	753.333333
S01 082	7	M	PF10_0138-s1	PF3D7_1014100	merozoite surface protein MSA180, putative	1078	496
S01 083	7	M	PF10_0138-s1	PF3D7_1014100	merozoite surface protein MSA180, putative	740.833333	1561.333333
S01 084	7	M	PF10_0138-s1	PF3D7_1014100	merozoite surface protein MSA180, putative	684.833333	689.666667
S01 085	7	M	PF10_0138-s1	PF3D7_1014100	merozoite surface protein MSA180, putative	1206.5	2115.5
S01 086	8	F	PF10_0138-s1	PF3D7_1014100	merozoite surface protein MSA180, putative	1405	959.666667
S01 087	7	F	PF10_0138-s1	PF3D7_1014100	merozoite surface protein MSA180, putative	330.5	820.5
S01 088	8	M	PF10_0138-s1	PF3D7_1014100	merozoite surface protein MSA180, putative	1074.666667	1483.833333
S01 089	11	M	PF10_0138-s1	PF3D7_1014100	merozoite surface protein MSA180, putative	8763	1775.666667
S01 090	9	M	PF10_0138-s1	PF3D7_1014100	merozoite surface protein MSA180, putative	642	472.166667
S01 091	8	M	PF10_0138-s1	PF3D7_1014100	merozoite surface protein MSA180, putative	1678.833333	1995.833333
S01 092	8	F	PF10_0138-s1	PF3D7_1014100	merozoite surface protein MSA180, putative	15233.16667	4940
S01 093	9	F	PF10_0138-s1	PF3D7_1014100	merozoite surface protein MSA180, putative	1781.333333	334.666667
S01 094	8	F	PF10_0138-s1	PF3D7_1014100	merozoite surface protein MSA180, putative	1463	720.5
S01 095	12	M	PF10_0138-s1	PF3D7_1014100	merozoite surface protein MSA180, putative	5136.166667	86.333333
S01 096	12	F	PF10_0138-s1	PF3D7_1014100	merozoite surface protein MSA180, putative	7979	560.333333
S01 097	12	F	PF10_0138-s1	PF3D7_1014100	merozoite surface protein MSA180, putative	-471.166667	959.333333
S01 098	10	F	PF10_0138-s1	PF3D7_1014100	merozoite surface protein MSA180, putative	1479	1315.5
S01 099	11	F	PF10_0138-s1	PF3D7_1014100	merozoite surface protein MSA180, putative	-158	2092
S01 100	10	F	PF10_0138-s1	PF3D7_1014100	merozoite surface protein MSA180, putative	1972.5	1402.833333
S01 001	84	F	PF14_0201	PF3D7_1420700	surface protein P113	5340.166667	451
S01 002	54	F	PF14_0201	PF3D7_1420700	surface protein P113	1457.833333	-325.166667
S01 003	50	F	PF14_0201	PF3D7_1420700	surface protein P113	4762.333333	850
S01 004	24	F	PF14_0201	PF3D7_1420700	surface protein P113	3156.166667	1318.5
S01 005	14	M	PF14_0201	PF3D7_1420700	surface protein P113	-2713.5	385.833333
S01 006	13	M	PF14_0201	PF3D7_1420700	surface protein P113	40.5	611
S01 007	65	F	PF14_0201	PF3D7_1420700	surface protein P113	8148.833333	2618.166667
S01 008	70	F	PF14_0201	PF3D7_1420700	surface protein P113	608.666667	459.5
S01 009	45	M	PF14_0201	PF3D7_1420700	surface protein P113	2999.166667	2462.5
S01 010	2	M	PF14_0201	PF3D7_1420700	surface protein P113	537	-564.833333
S01 011	68	F	PF14_0201	PF3D7_1420700	surface protein P113	-120.333333	780.833333
S01 012	66	F	PF14_0201	PF3D7_1420700	surface protein P113	13967.66667	6491.666667
S01 013	69	F	PF14_0201	PF3D7_1420700	surface protein P113	17.333333	-116.833333
S01 014	45	F	PF14_0201	PF3D7_1420700	surface protein P113	320	166.666667
S01 015	3	M	PF14_0201	PF3D7_1420700	surface protein P113	-792.166667	-220.5
S01 016	32	F	PF14_0201	PF3D7_1420700	surface protein P113	6872.333333	5542.333333
S01 017	57	F	PF14_0201	PF3D7_1420700	surface protein P113	2181.833333	930.166667
S01 018	2	F	PF14_0201	PF3D7_1420700	surface protein P113	-292.166667	-0.666667
S01 019	10	F	PF14_0201	PF3D7_1420700	surface protein P113	884.833333	-200.833333
S01 020	68	F	PF14_0201	PF3D7_1420700	surface protein P113	4366	3105.833333
S01 021	17	F	PF14_0201	PF3D7_1420700	surface protein P113	506	915.833333
S01 022	56	F	PF14_0201	PF3D7_1420700	surface protein P113	1467.833333	984.333333
S01 023	20	M	PF14_0201	PF3D7_1420700	surface protein P113	952.833333	-1928.833333
S01 024	15	M	PF14_0201	PF3D7_1420700	surface protein P113	310.333333	923.5
S01 025	68	F	PF14_0201	PF3D7_1420700	surface protein P113	9420.833333	2224
S01 026	13	F	PF14_0201	PF3D7_1420700	surface protein P113	-53.666667	207.833333
S01 027	54	F	PF14_0201	PF3D7_1420700	surface protein P113	716	1376.333333
S01 028	19	F	PF14_0201	PF3D7_1420700	surface protein P113	1347.333333	1389.5
S01 029	67	F	PF14_0201	PF3D7_1420700	surface protein P113	11835	4599.666667
S01 030	59	F	PF14_0201	PF3D7_1420700	surface protein P113	6595.166667	2683.833333
S01 031	68	M	PF14_0201	PF3D7_1420700	surface protein P113	3543.333333	-2440.333333
S01 032	63	M	PF14_0201	PF3D7_1420700	surface protein P113	9432.833333	2599
S01 033	39	F	PF14_0201	PF3D7_1420700	surface protein P113	2821.5	2323.833333
S01 034	36	F	PF14_0201	PF3D7_1420700	surface protein P113	3819.333333	-141.5
S01 035	31	F	PF14_0201	PF3D7_1420700	surface protein P113	3926.333333	3925.333333
S01 036	63	F	PF14_0201	PF3D7_1420700	surface protein P113	-1412	-391.333333
S01 037	48	F	PF14_0201	PF3D7_1420700	surface protein P113	428.166667	-456.5
S01 038	68	F	PF14_0201	PF3D7_1420700	surface protein P113	1167.833333	913.166667
S01 039	52	F	PF14_0201	PF3D7_1420700	surface protein P113	903.5	-222.833333
S01 040	35	F	PF14_0201	PF3D7_1420700	surface protein P113	1417	1621.333333
S01 041	55	F	PF14_0201	PF3D7_1420700	surface protein P113	1956.666667	1102.833333
S01 042	44	F	PF14_0201	PF3D7_1420700	surface protein P113	4225.666667	-307.166667
S01 043	69	F	PF14_0201	PF3D7_1420700	surface protein P113	14557.16667	6119.666667
S01 044	34	M	PF14_0201	PF3D7_1420700	surface protein P113	1276.666667	-548.666667
S01 045	68	M	PF14_0201	PF3D7_1420700	surface protein P113	-1694.5	1228.5
S01 046	56	M	PF14_0201	PF3D7_1420700	surface protein P113	2031.666667	-791.5
S01 047	58	M	PF14_0201	PF3D7_1420700	surface protein P113	1224.166667	795.333333
S01 048	35	M	PF14_0201	PF3D7_1420700	surface protein P113	-704.833333	-518.833333
S01 049	59	M	PF14_0201	PF3D7_1420700	surface protein P113	364.833333	73.166667
S01 050	31	M	PF14_0201	PF3D7_1420700	surface protein P113	9735.333333	2839.5
S01 051	23	F	PF14_0201	PF3D7_1420700	surface protein P113	-167.666667	351.5
S01 052	2	F	PF14_0201	PF3D7_1420700	surface protein P113	-27.833333	-535.333333
S01 053	68	M	PF14_0201	PF3D7_1420700	surface protein P113	-1444.666667	-142.666667
S01 054	73	M	PF14_0201	PF3D7_1420700	surface protein P113	1035.5	434.5
S01 055	41	F	PF14_0201	PF3D7_1420700	surface protein P113	570.333333	-58.333333
S01 056	56	F	PF14_0201	PF3D7_1420700	surface protein P113	4486.333333	1465.166667
S01 057	37	F	PF14_0201	PF3D7_1420700	surface protein P113	6998	2574.333333
S01 058	48	F	PF14_0201	PF3D7_1420700	surface protein P113	646.833333	-557.5
S01 059	27	F	PF14_0201	PF3D7_1420700	surface protein P113	596	-20.166667
S01 060	16	F	PF14_0201	PF3D7_1420700	surface protein P113	348	-422.666667
S01 061	47	F	PF14_0201	PF3D7_1420700	surface protein P113	6599.5	2692.333333
S01 062	14	M	PF14_0201	PF3D7_1420700	surface protein P113	-75.666667	326.166667
S01 063	32	F	PF14_0201	PF3D7_1420700	surface protein P113	794.666667	254.166667
S01 064	31	F	PF14_0201	PF3D7_1420700	surface protein P113	1728.833333	439.833333
S01 065	15	F	PF14_0201	PF3D7_1420700	surface protein P113	340.666667	646
S01 066	60	F	PF14_0201	PF3D7_1420700	surface protein P113	2820.333333	383.833333
S01 067	25	F	PF14_0201	PF3D7_1420700	surface protein P113	337	193
S01 068	54	M	PF14_0201	PF3D7_1420700	surface protein P113	9331.166667	3918.833333
S01 069	38	F	PF14_0201	PF3D7_1420700	surface protein P113	2218.166667	184.666667
S01 070	30	F	PF14_0201	PF3D7_1420700	surface protein P113	2661.5	1583
S01 071	37	F	PF14_0201	PF3D7_1420700	surface protein P113	3201.166667	710.666667
S01 072	36	M	PF14_0201	PF3D7_1420700	surface protein P113	6801.333333	3071.166667
S01 073	48	M	PF14_0201	PF3D7_1420700	surface protein P113	1873.5	-39.833333
S01 074	28	F	PF14_0201	PF3D7_1420700	surface protein P113	918	44.166667
S01 075	56	F	PF14_0201	PF3D7_1420700	surface protein P113	979.5	709.333333
S01 076	28	F	PF14_0201	PF3D7_1420700	surface protein P113	719	-141.666667
S01 077	64	F	PF14_0201	PF3D7_1420700	surface protein P113	1000.5	12.166667
S01 078	65	F	PF14_0201	PF3D7_1420700	surface protein P113	3342.5	1451
S01 079	12	M	PF14_0201	PF3D7_1420700	surface protein P113	187.666667	428.5
S01 080	41	M	PF14_0201	PF3D7_1420700	surface protein P113	606.333333	640.5
S01 081	8	M	PF14_0201	PF3D7_1420700	surface protein P113	604.5	-203.666667
S01 082	7	M	PF14_0201	PF3D7_1420700	surface protein P113	488	287
S01 083	7	M	PF14_0201	PF3D7_1420700	surface protein P113	-301.166667	416.333333
S01 084	7	M	PF14_0201	PF3D7_1420700	surface protein P113	675.833333	369.666667
S01 085	7	M	PF14_0201	PF3D7_1420700	surface protein P113	1357.5	485.5
S01 086	8	F	PF14_0201	PF3D7_1420700	surface protein P113	1314	1200.666667
S01 087	7	F	PF14_0201	PF3D7_1420700	surface protein P113	884.5	474.5
S01 088	8	M	PF14_0201	PF3D7_1420700	surface protein P113	254.666667	553.833333
S01 089	11	M	PF14_0201	PF3D7_1420700	surface protein P113	9046	2885.666667
S01 090	9	M	PF14_0201	PF3D7_1420700	surface protein P113	259	175.166667
S01 091	8	M	PF14_0201	PF3D7_1420700	surface protein P113	-552.166667	2238.833333
S01 092	8	F	PF14_0201	PF3D7_1420700	surface protein P113	-186.833333	-406
S01 093	9	F	PF14_0201	PF3D7_1420700	surface protein P113	342.333333	-627.333333
S01 094	8	F	PF14_0201	PF3D7_1420700	surface protein P113	669	130.5
S01 095	12	M	PF14_0201	PF3D7_1420700	surface protein P113	277.166667	-1132.666667
S01 096	12	F	PF14_0201	PF3D7_1420700	surface protein P113	100	591.333333
S01 097	12	F	PF14_0201	PF3D7_1420700	surface protein P113	25.833333	1555.333333
S01 098	10	F	PF14_0201	PF3D7_1420700	surface protein P113	-236	996.5
S01 099	11	F	PF14_0201	PF3D7_1420700	surface protein P113	1563	667
S01 100	10	F	PF14_0201	PF3D7_1420700	surface protein P113	2156.5	1383.833333
S01 001	84	F	PFD1145c.2o2	PF3D7_0424100	reticulocyte binding protein homologue 5	1143.166667	993
S01 002	54	F	PFD1145c.2o2	PF3D7_0424100	reticulocyte binding protein homologue 5	183.833333	-539.166667
S01 003	50	F	PFD1145c.2o2	PF3D7_0424100	reticulocyte binding protein homologue 5	708.333333	-363
S01 004	24	F	PFD1145c.2o2	PF3D7_0424100	reticulocyte binding protein homologue 5	4226.166667	-392.5
S01 005	14	M	PFD1145c.2o2	PF3D7_0424100	reticulocyte binding protein homologue 5	829.5	-318.166667
S01 006	13	M	PFD1145c.2o2	PF3D7_0424100	reticulocyte binding protein homologue 5	527.5	66
S01 007	65	F	PFD1145c.2o2	PF3D7_0424100	reticulocyte binding protein homologue 5	3394.833333	161.166667
S01 008	70	F	PFD1145c.2o2	PF3D7_0424100	reticulocyte binding protein homologue 5	-278.333333	273.5
S01 009	45	M	PFD1145c.2o2	PF3D7_0424100	reticulocyte binding protein homologue 5	2120.166667	-344.5
S01 010	2	M	PFD1145c.2o2	PF3D7_0424100	reticulocyte binding protein homologue 5	260	79.166667
S01 011	68	F	PFD1145c.2o2	PF3D7_0424100	reticulocyte binding protein homologue 5	575.666667	252.833333
S01 012	66	F	PFD1145c.2o2	PF3D7_0424100	reticulocyte binding protein homologue 5	13632.66667	6359.666667
S01 013	69	F	PFD1145c.2o2	PF3D7_0424100	reticulocyte binding protein homologue 5	0.333333	-564.833333
S01 014	45	F	PFD1145c.2o2	PF3D7_0424100	reticulocyte binding protein homologue 5	134	-473.333333
S01 015	3	M	PFD1145c.2o2	PF3D7_0424100	reticulocyte binding protein homologue 5	-686.166667	-487.5
S01 016	32	F	PFD1145c.2o2	PF3D7_0424100	reticulocyte binding protein homologue 5	1091.333333	238.333333
S01 017	57	F	PFD1145c.2o2	PF3D7_0424100	reticulocyte binding protein homologue 5	291.833333	-323.833333
S01 018	2	F	PFD1145c.2o2	PF3D7_0424100	reticulocyte binding protein homologue 5	1381.833333	-1555.666667
S01 019	10	F	PFD1145c.2o2	PF3D7_0424100	reticulocyte binding protein homologue 5	1353.833333	-86.833333
S01 020	68	F	PFD1145c.2o2	PF3D7_0424100	reticulocyte binding protein homologue 5	1432	800.833333
S01 021	17	F	PFD1145c.2o2	PF3D7_0424100	reticulocyte binding protein homologue 5	-69	1451.833333
S01 022	56	F	PFD1145c.2o2	PF3D7_0424100	reticulocyte binding protein homologue 5	1408.833333	10.333333
S01 023	20	M	PFD1145c.2o2	PF3D7_0424100	reticulocyte binding protein homologue 5	1746.833333	-876.833333
S01 024	15	M	PFD1145c.2o2	PF3D7_0424100	reticulocyte binding protein homologue 5	55.333333	120.5
S01 025	68	F	PFD1145c.2o2	PF3D7_0424100	reticulocyte binding protein homologue 5	719.833333	394
S01 026	13	F	PFD1145c.2o2	PF3D7_0424100	reticulocyte binding protein homologue 5	275.333333	283.833333
S01 027	54	F	PFD1145c.2o2	PF3D7_0424100	reticulocyte binding protein homologue 5	-204	1211.333333
S01 028	19	F	PFD1145c.2o2	PF3D7_0424100	reticulocyte binding protein homologue 5	-256.666667	305.5
S01 029	67	F	PFD1145c.2o2	PF3D7_0424100	reticulocyte binding protein homologue 5	7684	2733.666667
S01 030	59	F	PFD1145c.2o2	PF3D7_0424100	reticulocyte binding protein homologue 5	1747.166667	-72.166667
S01 031	68	M	PFD1145c.2o2	PF3D7_0424100	reticulocyte binding protein homologue 5	1621.333333	-2168.333333
S01 032	63	M	PFD1145c.2o2	PF3D7_0424100	reticulocyte binding protein homologue 5	2831.833333	-4192
S01 033	39	F	PFD1145c.2o2	PF3D7_0424100	reticulocyte binding protein homologue 5	486.5	299.833333
S01 034	36	F	PFD1145c.2o2	PF3D7_0424100	reticulocyte binding protein homologue 5	2613.333333	-212.5
S01 035	31	F	PFD1145c.2o2	PF3D7_0424100	reticulocyte binding protein homologue 5	-737.666667	2014.333333
S01 036	63	F	PFD1145c.2o2	PF3D7_0424100	reticulocyte binding protein homologue 5	79	-31.333333
S01 037	48	F	PFD1145c.2o2	PF3D7_0424100	reticulocyte binding protein homologue 5	4778.166667	2567.5
S01 038	68	F	PFD1145c.2o2	PF3D7_0424100	reticulocyte binding protein homologue 5	1361.833333	-183.833333
S01 039	52	F	PFD1145c.2o2	PF3D7_0424100	reticulocyte binding protein homologue 5	-852.5	-189.833333
S01 040	35	F	PFD1145c.2o2	PF3D7_0424100	reticulocyte binding protein homologue 5	2373	642.333333
S01 041	55	F	PFD1145c.2o2	PF3D7_0424100	reticulocyte binding protein homologue 5	-141.333333	101.833333
S01 042	44	F	PFD1145c.2o2	PF3D7_0424100	reticulocyte binding protein homologue 5	1820.666667	-968.166667
S01 043	69	F	PFD1145c.2o2	PF3D7_0424100	reticulocyte binding protein homologue 5	-3.833333	-1604.333333
S01 044	34	M	PFD1145c.2o2	PF3D7_0424100	reticulocyte binding protein homologue 5	174.666667	-728.666667
S01 045	68	M	PFD1145c.2o2	PF3D7_0424100	reticulocyte binding protein homologue 5	1091.5	1461.5
S01 046	56	M	PFD1145c.2o2	PF3D7_0424100	reticulocyte binding protein homologue 5	-117.333333	-446.5
S01 047	58	M	PFD1145c.2o2	PF3D7_0424100	reticulocyte binding protein homologue 5	1848.166667	-268.666667
S01 048	35	M	PFD1145c.2o2	PF3D7_0424100	reticulocyte binding protein homologue 5	-347.833333	-1036.833333
S01 049	59	M	PFD1145c.2o2	PF3D7_0424100	reticulocyte binding protein homologue 5	650.833333	498.166667
S01 050	31	M	PFD1145c.2o2	PF3D7_0424100	reticulocyte binding protein homologue 5	1015.333333	-2010.5
S01 051	23	F	PFD1145c.2o2	PF3D7_0424100	reticulocyte binding protein homologue 5	390.333333	-228.5
S01 052	2	F	PFD1145c.2o2	PF3D7_0424100	reticulocyte binding protein homologue 5	-102.833333	-1650.333333
S01 053	68	M	PFD1145c.2o2	PF3D7_0424100	reticulocyte binding protein homologue 5	1525.333333	947.333333
S01 054	73	M	PFD1145c.2o2	PF3D7_0424100	reticulocyte binding protein homologue 5	1396.5	-129.5
S01 055	41	F	PFD1145c.2o2	PF3D7_0424100	reticulocyte binding protein homologue 5	194.333333	-90.333333
S01 056	56	F	PFD1145c.2o2	PF3D7_0424100	reticulocyte binding protein homologue 5	-198.666667	-137.833333
S01 057	37	F	PFD1145c.2o2	PF3D7_0424100	reticulocyte binding protein homologue 5	7498	1771.333333
S01 058	48	F	PFD1145c.2o2	PF3D7_0424100	reticulocyte binding protein homologue 5	494.833333	-323.5
S01 059	27	F	PFD1145c.2o2	PF3D7_0424100	reticulocyte binding protein homologue 5	1361	-29.166667
S01 060	16	F	PFD1145c.2o2	PF3D7_0424100	reticulocyte binding protein homologue 5	384	-309.666667
S01 061	47	F	PFD1145c.2o2	PF3D7_0424100	reticulocyte binding protein homologue 5	2450.5	-690.666667
S01 062	14	M	PFD1145c.2o2	PF3D7_0424100	reticulocyte binding protein homologue 5	1235.333333	-230.833333
S01 063	32	F	PFD1145c.2o2	PF3D7_0424100	reticulocyte binding protein homologue 5	-338.333333	-811.833333
S01 064	31	F	PFD1145c.2o2	PF3D7_0424100	reticulocyte binding protein homologue 5	990.833333	-274.166667
S01 065	15	F	PFD1145c.2o2	PF3D7_0424100	reticulocyte binding protein homologue 5	143.666667	-961
S01 066	60	F	PFD1145c.2o2	PF3D7_0424100	reticulocyte binding protein homologue 5	29.333333	-786.166667
S01 067	25	F	PFD1145c.2o2	PF3D7_0424100	reticulocyte binding protein homologue 5	-159	-569
S01 068	54	M	PFD1145c.2o2	PF3D7_0424100	reticulocyte binding protein homologue 5	0.166667	-121.166667
S01 069	38	F	PFD1145c.2o2	PF3D7_0424100	reticulocyte binding protein homologue 5	-267.833333	-40.333333
S01 070	30	F	PFD1145c.2o2	PF3D7_0424100	reticulocyte binding protein homologue 5	514.5	-184
S01 071	37	F	PFD1145c.2o2	PF3D7_0424100	reticulocyte binding protein homologue 5	-136.833333	-558.333333
S01 072	36	M	PFD1145c.2o2	PF3D7_0424100	reticulocyte binding protein homologue 5	267.333333	-221.833333
S01 073	48	M	PFD1145c.2o2	PF3D7_0424100	reticulocyte binding protein homologue 5	-28.5	-857.833333
S01 074	28	F	PFD1145c.2o2	PF3D7_0424100	reticulocyte binding protein homologue 5	242	-1066.833333
S01 075	56	F	PFD1145c.2o2	PF3D7_0424100	reticulocyte binding protein homologue 5	-751.5	-1166.666667
S01 076	28	F	PFD1145c.2o2	PF3D7_0424100	reticulocyte binding protein homologue 5	502	-323.666667
S01 077	64	F	PFD1145c.2o2	PF3D7_0424100	reticulocyte binding protein homologue 5	-269.5	441.166667
S01 078	65	F	PFD1145c.2o2	PF3D7_0424100	reticulocyte binding protein homologue 5	555.5	467
S01 079	12	M	PFD1145c.2o2	PF3D7_0424100	reticulocyte binding protein homologue 5	-468.333333	-123.5
S01 080	41	M	PFD1145c.2o2	PF3D7_0424100	reticulocyte binding protein homologue 5	1144.333333	42.5
S01 081	8	M	PFD1145c.2o2	PF3D7_0424100	reticulocyte binding protein homologue 5	-189.5	-640.666667
S01 082	7	M	PFD1145c.2o2	PF3D7_0424100	reticulocyte binding protein homologue 5	-330	-525
S01 083	7	M	PFD1145c.2o2	PF3D7_0424100	reticulocyte binding protein homologue 5	-254.166667	427.333333
S01 084	7	M	PFD1145c.2o2	PF3D7_0424100	reticulocyte binding protein homologue 5	587.833333	251.666667
S01 085	7	M	PFD1145c.2o2	PF3D7_0424100	reticulocyte binding protein homologue 5	-108.5	504.5
S01 086	8	F	PFD1145c.2o2	PF3D7_0424100	reticulocyte binding protein homologue 5	-548	315.666667
S01 087	7	F	PFD1145c.2o2	PF3D7_0424100	reticulocyte binding protein homologue 5	-224.5	-888.5
S01 088	8	M	PFD1145c.2o2	PF3D7_0424100	reticulocyte binding protein homologue 5	1200.666667	-610.166667
S01 089	11	M	PFD1145c.2o2	PF3D7_0424100	reticulocyte binding protein homologue 5	-212	-1496.333333
S01 090	9	M	PFD1145c.2o2	PF3D7_0424100	reticulocyte binding protein homologue 5	-337	-997.833333
S01 091	8	M	PFD1145c.2o2	PF3D7_0424100	reticulocyte binding protein homologue 5	-1078.166667	464.833333
S01 092	8	F	PFD1145c.2o2	PF3D7_0424100	reticulocyte binding protein homologue 5	22.166667	-243
S01 093	9	F	PFD1145c.2o2	PF3D7_0424100	reticulocyte binding protein homologue 5	167.333333	-389.333333
S01 094	8	F	PFD1145c.2o2	PF3D7_0424100	reticulocyte binding protein homologue 5	-816	-1392.5
S01 095	12	M	PFD1145c.2o2	PF3D7_0424100	reticulocyte binding protein homologue 5	-132.833333	-1804.666667
S01 096	12	F	PFD1145c.2o2	PF3D7_0424100	reticulocyte binding protein homologue 5	132	-1440.666667
S01 097	12	F	PFD1145c.2o2	PF3D7_0424100	reticulocyte binding protein homologue 5	-2029.166667	-1074.666667
S01 098	10	F	PFD1145c.2o2	PF3D7_0424100	reticulocyte binding protein homologue 5	-1084	-852.5
S01 099	11	F	PFD1145c.2o2	PF3D7_0424100	reticulocyte binding protein homologue 5	1597	228
S01 100	10	F	PFD1145c.2o2	PF3D7_0424100	reticulocyte binding protein homologue 5	-573.5	194.833333
S01 001	84	F	PFC0130ce1s1	PF3D7_0302800	conserved Plasmodium protein, unknown function	4757.166667	1357
S01 002	54	F	PFC0130ce1s1	PF3D7_0302800	conserved Plasmodium protein, unknown function	3243.833333	1180.833333
S01 003	50	F	PFC0130ce1s1	PF3D7_0302800	conserved Plasmodium protein, unknown function	8883.333333	3608
S01 004	24	F	PFC0130ce1s1	PF3D7_0302800	conserved Plasmodium protein, unknown function	221.166667	522.5
S01 005	14	M	PFC0130ce1s1	PF3D7_0302800	conserved Plasmodium protein, unknown function	-123.5	2170.833333
S01 006	13	M	PFC0130ce1s1	PF3D7_0302800	conserved Plasmodium protein, unknown function	-268.5	281
S01 007	65	F	PFC0130ce1s1	PF3D7_0302800	conserved Plasmodium protein, unknown function	8456.833333	6430.166667
S01 008	70	F	PFC0130ce1s1	PF3D7_0302800	conserved Plasmodium protein, unknown function	1072.666667	337.5
S01 009	45	M	PFC0130ce1s1	PF3D7_0302800	conserved Plasmodium protein, unknown function	3181.166667	3673.5
S01 010	2	M	PFC0130ce1s1	PF3D7_0302800	conserved Plasmodium protein, unknown function	432	-223.833333
S01 011	68	F	PFC0130ce1s1	PF3D7_0302800	conserved Plasmodium protein, unknown function	1853.666667	833.833333
S01 012	66	F	PFC0130ce1s1	PF3D7_0302800	conserved Plasmodium protein, unknown function	12450.66667	4294.666667
S01 013	69	F	PFC0130ce1s1	PF3D7_0302800	conserved Plasmodium protein, unknown function	7957.333333	1013.166667
S01 014	45	F	PFC0130ce1s1	PF3D7_0302800	conserved Plasmodium protein, unknown function	477	955.666667
S01 015	3	M	PFC0130ce1s1	PF3D7_0302800	conserved Plasmodium protein, unknown function	448.833333	893.5
S01 016	32	F	PFC0130ce1s1	PF3D7_0302800	conserved Plasmodium protein, unknown function	379.333333	1396.333333
S01 017	57	F	PFC0130ce1s1	PF3D7_0302800	conserved Plasmodium protein, unknown function	2982.833333	1778.166667
S01 018	2	F	PFC0130ce1s1	PF3D7_0302800	conserved Plasmodium protein, unknown function	808.833333	906.333333
S01 019	10	F	PFC0130ce1s1	PF3D7_0302800	conserved Plasmodium protein, unknown function	2041.833333	854.166667
S01 020	68	F	PFC0130ce1s1	PF3D7_0302800	conserved Plasmodium protein, unknown function	11532	5771.833333
S01 021	17	F	PFC0130ce1s1	PF3D7_0302800	conserved Plasmodium protein, unknown function	1315	1011.833333
S01 022	56	F	PFC0130ce1s1	PF3D7_0302800	conserved Plasmodium protein, unknown function	4310.833333	1003.333333
S01 023	20	M	PFC0130ce1s1	PF3D7_0302800	conserved Plasmodium protein, unknown function	901.833333	-379.833333
S01 024	15	M	PFC0130ce1s1	PF3D7_0302800	conserved Plasmodium protein, unknown function	8826.333333	4679.5
S01 025	68	F	PFC0130ce1s1	PF3D7_0302800	conserved Plasmodium protein, unknown function	5620.833333	1627
S01 026	13	F	PFC0130ce1s1	PF3D7_0302800	conserved Plasmodium protein, unknown function	838.333333	-295.166667
S01 027	54	F	PFC0130ce1s1	PF3D7_0302800	conserved Plasmodium protein, unknown function	239	849.333333
S01 028	19	F	PFC0130ce1s1	PF3D7_0302800	conserved Plasmodium protein, unknown function	316.333333	256.5
S01 029	67	F	PFC0130ce1s1	PF3D7_0302800	conserved Plasmodium protein, unknown function	11408	6316.666667
S01 030	59	F	PFC0130ce1s1	PF3D7_0302800	conserved Plasmodium protein, unknown function	8553.166667	2524.833333
S01 031	68	M	PFC0130ce1s1	PF3D7_0302800	conserved Plasmodium protein, unknown function	5675.333333	-745.333333
S01 032	63	M	PFC0130ce1s1	PF3D7_0302800	conserved Plasmodium protein, unknown function	9470.833333	2444
S01 033	39	F	PFC0130ce1s1	PF3D7_0302800	conserved Plasmodium protein, unknown function	333.5	1355.833333
S01 034	36	F	PFC0130ce1s1	PF3D7_0302800	conserved Plasmodium protein, unknown function	8652.333333	560.5
S01 035	31	F	PFC0130ce1s1	PF3D7_0302800	conserved Plasmodium protein, unknown function	437.333333	1612.333333
S01 036	63	F	PFC0130ce1s1	PF3D7_0302800	conserved Plasmodium protein, unknown function	1816	672.666667
S01 037	48	F	PFC0130ce1s1	PF3D7_0302800	conserved Plasmodium protein, unknown function	2742.166667	536.5
S01 038	68	F	PFC0130ce1s1	PF3D7_0302800	conserved Plasmodium protein, unknown function	2518.833333	2133.166667
S01 039	52	F	PFC0130ce1s1	PF3D7_0302800	conserved Plasmodium protein, unknown function	3988.5	23.166667
S01 040	35	F	PFC0130ce1s1	PF3D7_0302800	conserved Plasmodium protein, unknown function	180	-593.666667
S01 041	55	F	PFC0130ce1s1	PF3D7_0302800	conserved Plasmodium protein, unknown function	850.666667	-4.166667
S01 042	44	F	PFC0130ce1s1	PF3D7_0302800	conserved Plasmodium protein, unknown function	834.666667	-166.166667
S01 043	69	F	PFC0130ce1s1	PF3D7_0302800	conserved Plasmodium protein, unknown function	929.166667	1980.666667
S01 044	34	M	PFC0130ce1s1	PF3D7_0302800	conserved Plasmodium protein, unknown function	5708.666667	-327.666667
S01 045	68	M	PFC0130ce1s1	PF3D7_0302800	conserved Plasmodium protein, unknown function	2128.5	733.5
S01 046	56	M	PFC0130ce1s1	PF3D7_0302800	conserved Plasmodium protein, unknown function	399.666667	538.5
S01 047	58	M	PFC0130ce1s1	PF3D7_0302800	conserved Plasmodium protein, unknown function	4445.166667	-49.666667
S01 048	35	M	PFC0130ce1s1	PF3D7_0302800	conserved Plasmodium protein, unknown function	1412.166667	-1267.833333
S01 049	59	M	PFC0130ce1s1	PF3D7_0302800	conserved Plasmodium protein, unknown function	559.833333	411.166667
S01 050	31	M	PFC0130ce1s1	PF3D7_0302800	conserved Plasmodium protein, unknown function	9119.333333	9917.5
S01 051	23	F	PFC0130ce1s1	PF3D7_0302800	conserved Plasmodium protein, unknown function	1041.333333	191.5
S01 052	2	F	PFC0130ce1s1	PF3D7_0302800	conserved Plasmodium protein, unknown function	671.166667	-194.333333
S01 053	68	M	PFC0130ce1s1	PF3D7_0302800	conserved Plasmodium protein, unknown function	740.333333	-45.666667
S01 054	73	M	PFC0130ce1s1	PF3D7_0302800	conserved Plasmodium protein, unknown function	2587.5	1044.5
S01 055	41	F	PFC0130ce1s1	PF3D7_0302800	conserved Plasmodium protein, unknown function	547.333333	490.666667
S01 056	56	F	PFC0130ce1s1	PF3D7_0302800	conserved Plasmodium protein, unknown function	455.333333	-274.833333
S01 057	37	F	PFC0130ce1s1	PF3D7_0302800	conserved Plasmodium protein, unknown function	5207	1348.333333
S01 058	48	F	PFC0130ce1s1	PF3D7_0302800	conserved Plasmodium protein, unknown function	994.833333	81.5
S01 059	27	F	PFC0130ce1s1	PF3D7_0302800	conserved Plasmodium protein, unknown function	251	-719.166667
S01 060	16	F	PFC0130ce1s1	PF3D7_0302800	conserved Plasmodium protein, unknown function	1094	446.333333
S01 061	47	F	PFC0130ce1s1	PF3D7_0302800	conserved Plasmodium protein, unknown function	4884.5	190.333333
S01 062	14	M	PFC0130ce1s1	PF3D7_0302800	conserved Plasmodium protein, unknown function	916.333333	-802.833333
S01 063	32	F	PFC0130ce1s1	PF3D7_0302800	conserved Plasmodium protein, unknown function	12115.66667	1972.166667
S01 064	31	F	PFC0130ce1s1	PF3D7_0302800	conserved Plasmodium protein, unknown function	1085.833333	856.833333
S01 065	15	F	PFC0130ce1s1	PF3D7_0302800	conserved Plasmodium protein, unknown function	1066.666667	237
S01 066	60	F	PFC0130ce1s1	PF3D7_0302800	conserved Plasmodium protein, unknown function	1651.333333	457.833333
S01 067	25	F	PFC0130ce1s1	PF3D7_0302800	conserved Plasmodium protein, unknown function	852	559
S01 068	54	M	PFC0130ce1s1	PF3D7_0302800	conserved Plasmodium protein, unknown function	7367.166667	2566.833333
S01 069	38	F	PFC0130ce1s1	PF3D7_0302800	conserved Plasmodium protein, unknown function	10249.16667	4128.666667
S01 070	30	F	PFC0130ce1s1	PF3D7_0302800	conserved Plasmodium protein, unknown function	2573.5	969
S01 071	37	F	PFC0130ce1s1	PF3D7_0302800	conserved Plasmodium protein, unknown function	782.166667	1309.666667
S01 072	36	M	PFC0130ce1s1	PF3D7_0302800	conserved Plasmodium protein, unknown function	2178.333333	1421.166667
S01 073	48	M	PFC0130ce1s1	PF3D7_0302800	conserved Plasmodium protein, unknown function	1569.5	201.166667
S01 074	28	F	PFC0130ce1s1	PF3D7_0302800	conserved Plasmodium protein, unknown function	-772	1156.166667
S01 075	56	F	PFC0130ce1s1	PF3D7_0302800	conserved Plasmodium protein, unknown function	2430.5	756.333333
S01 076	28	F	PFC0130ce1s1	PF3D7_0302800	conserved Plasmodium protein, unknown function	1363	1239.333333
S01 077	64	F	PFC0130ce1s1	PF3D7_0302800	conserved Plasmodium protein, unknown function	1995.5	315.166667
S01 078	65	F	PFC0130ce1s1	PF3D7_0302800	conserved Plasmodium protein, unknown function	4851.5	1661
S01 079	12	M	PFC0130ce1s1	PF3D7_0302800	conserved Plasmodium protein, unknown function	410.666667	1063.5
S01 080	41	M	PFC0130ce1s1	PF3D7_0302800	conserved Plasmodium protein, unknown function	962.333333	821.5
S01 081	8	M	PFC0130ce1s1	PF3D7_0302800	conserved Plasmodium protein, unknown function	877.5	153.333333
S01 082	7	M	PFC0130ce1s1	PF3D7_0302800	conserved Plasmodium protein, unknown function	945	869
S01 083	7	M	PFC0130ce1s1	PF3D7_0302800	conserved Plasmodium protein, unknown function	283.833333	545.333333
S01 084	7	M	PFC0130ce1s1	PF3D7_0302800	conserved Plasmodium protein, unknown function	1821.833333	829.666667
S01 085	7	M	PFC0130ce1s1	PF3D7_0302800	conserved Plasmodium protein, unknown function	887.5	217.5
S01 086	8	F	PFC0130ce1s1	PF3D7_0302800	conserved Plasmodium protein, unknown function	3535	1776.666667
S01 087	7	F	PFC0130ce1s1	PF3D7_0302800	conserved Plasmodium protein, unknown function	5067.5	3275.5
S01 088	8	M	PFC0130ce1s1	PF3D7_0302800	conserved Plasmodium protein, unknown function	469.666667	537.833333
S01 089	11	M	PFC0130ce1s1	PF3D7_0302800	conserved Plasmodium protein, unknown function	14730	6136.666667
S01 090	9	M	PFC0130ce1s1	PF3D7_0302800	conserved Plasmodium protein, unknown function	141	975.166667
S01 091	8	M	PFC0130ce1s1	PF3D7_0302800	conserved Plasmodium protein, unknown function	447.833333	2430.833333
S01 092	8	F	PFC0130ce1s1	PF3D7_0302800	conserved Plasmodium protein, unknown function	-186.833333	767
S01 093	9	F	PFC0130ce1s1	PF3D7_0302800	conserved Plasmodium protein, unknown function	1698.333333	-929.333333
S01 094	8	F	PFC0130ce1s1	PF3D7_0302800	conserved Plasmodium protein, unknown function	-501	-1947.5
S01 095	12	M	PFC0130ce1s1	PF3D7_0302800	conserved Plasmodium protein, unknown function	1791.166667	241.333333
S01 096	12	F	PFC0130ce1s1	PF3D7_0302800	conserved Plasmodium protein, unknown function	235	-460.666667
S01 097	12	F	PFC0130ce1s1	PF3D7_0302800	conserved Plasmodium protein, unknown function	84.833333	1069.333333
S01 098	10	F	PFC0130ce1s1	PF3D7_0302800	conserved Plasmodium protein, unknown function	203	1044.5
S01 099	11	F	PFC0130ce1s1	PF3D7_0302800	conserved Plasmodium protein, unknown function	3838	3312
S01 100	10	F	PFC0130ce1s1	PF3D7_0302800	conserved Plasmodium protein, unknown function	1180.5	1379.833333
S01 001	84	F	PFL1415w.1o1	PF3D7_1229300	conserved Plasmodium protein, unknown function	4995.166667	1789
S01 002	54	F	PFL1415w.1o1	PF3D7_1229300	conserved Plasmodium protein, unknown function	-389.166667	-37.166667
S01 003	50	F	PFL1415w.1o1	PF3D7_1229300	conserved Plasmodium protein, unknown function	8692.333333	2160
S01 004	24	F	PFL1415w.1o1	PF3D7_1229300	conserved Plasmodium protein, unknown function	-1731.833333	510.5
S01 005	14	M	PFL1415w.1o1	PF3D7_1229300	conserved Plasmodium protein, unknown function	-1399.5	-566.166667
S01 006	13	M	PFL1415w.1o1	PF3D7_1229300	conserved Plasmodium protein, unknown function	-352.5	-765
S01 007	65	F	PFL1415w.1o1	PF3D7_1229300	conserved Plasmodium protein, unknown function	8531.833333	6767.166667
S01 008	70	F	PFL1415w.1o1	PF3D7_1229300	conserved Plasmodium protein, unknown function	1353.666667	699.5
S01 009	45	M	PFL1415w.1o1	PF3D7_1229300	conserved Plasmodium protein, unknown function	3351.166667	-377.5
S01 010	2	M	PFL1415w.1o1	PF3D7_1229300	conserved Plasmodium protein, unknown function	-1435	228.166667
S01 011	68	F	PFL1415w.1o1	PF3D7_1229300	conserved Plasmodium protein, unknown function	112.666667	161.833333
S01 012	66	F	PFL1415w.1o1	PF3D7_1229300	conserved Plasmodium protein, unknown function	12057.66667	9485.666667
S01 013	69	F	PFL1415w.1o1	PF3D7_1229300	conserved Plasmodium protein, unknown function	-1560.666667	-133.833333
S01 014	45	F	PFL1415w.1o1	PF3D7_1229300	conserved Plasmodium protein, unknown function	5818	377.666667
S01 015	3	M	PFL1415w.1o1	PF3D7_1229300	conserved Plasmodium protein, unknown function	-1118.166667	-865.5
S01 016	32	F	PFL1415w.1o1	PF3D7_1229300	conserved Plasmodium protein, unknown function	1631.333333	97.333333
S01 017	57	F	PFL1415w.1o1	PF3D7_1229300	conserved Plasmodium protein, unknown function	1108.833333	905.166667
S01 018	2	F	PFL1415w.1o1	PF3D7_1229300	conserved Plasmodium protein, unknown function	-562.166667	-776.666667
S01 019	10	F	PFL1415w.1o1	PF3D7_1229300	conserved Plasmodium protein, unknown function	579.833333	-826.833333
S01 020	68	F	PFL1415w.1o1	PF3D7_1229300	conserved Plasmodium protein, unknown function	6687	6238.833333
S01 021	17	F	PFL1415w.1o1	PF3D7_1229300	conserved Plasmodium protein, unknown function	-863	143.833333
S01 022	56	F	PFL1415w.1o1	PF3D7_1229300	conserved Plasmodium protein, unknown function	1616.833333	-866.666667
S01 023	20	M	PFL1415w.1o1	PF3D7_1229300	conserved Plasmodium protein, unknown function	112.833333	-1064.833333
S01 024	15	M	PFL1415w.1o1	PF3D7_1229300	conserved Plasmodium protein, unknown function	349.333333	31.5
S01 025	68	F	PFL1415w.1o1	PF3D7_1229300	conserved Plasmodium protein, unknown function	13497.83333	1620
S01 026	13	F	PFL1415w.1o1	PF3D7_1229300	conserved Plasmodium protein, unknown function	10.333333	-182.166667
S01 027	54	F	PFL1415w.1o1	PF3D7_1229300	conserved Plasmodium protein, unknown function	3837	1808.333333
S01 028	19	F	PFL1415w.1o1	PF3D7_1229300	conserved Plasmodium protein, unknown function	195.333333	436.5
S01 029	67	F	PFL1415w.1o1	PF3D7_1229300	conserved Plasmodium protein, unknown function	12315	7777.666667
S01 030	59	F	PFL1415w.1o1	PF3D7_1229300	conserved Plasmodium protein, unknown function	3733.166667	437.833333
S01 031	68	M	PFL1415w.1o1	PF3D7_1229300	conserved Plasmodium protein, unknown function	5624.333333	-1596.333333
S01 032	63	M	PFL1415w.1o1	PF3D7_1229300	conserved Plasmodium protein, unknown function	9579.833333	2969
S01 033	39	F	PFL1415w.1o1	PF3D7_1229300	conserved Plasmodium protein, unknown function	13648.5	10886.83333
S01 034	36	F	PFL1415w.1o1	PF3D7_1229300	conserved Plasmodium protein, unknown function	2704.333333	-1004.5
S01 035	31	F	PFL1415w.1o1	PF3D7_1229300	conserved Plasmodium protein, unknown function	2336.333333	745.333333
S01 036	63	F	PFL1415w.1o1	PF3D7_1229300	conserved Plasmodium protein, unknown function	1457	-814.333333
S01 037	48	F	PFL1415w.1o1	PF3D7_1229300	conserved Plasmodium protein, unknown function	344.166667	-37.5
S01 038	68	F	PFL1415w.1o1	PF3D7_1229300	conserved Plasmodium protein, unknown function	1295.833333	368.166667
S01 039	52	F	PFL1415w.1o1	PF3D7_1229300	conserved Plasmodium protein, unknown function	5537.5	530.166667
S01 040	35	F	PFL1415w.1o1	PF3D7_1229300	conserved Plasmodium protein, unknown function	180	-488.666667
S01 041	55	F	PFL1415w.1o1	PF3D7_1229300	conserved Plasmodium protein, unknown function	6751.666667	2601.833333
S01 042	44	F	PFL1415w.1o1	PF3D7_1229300	conserved Plasmodium protein, unknown function	500.666667	797.833333
S01 043	69	F	PFL1415w.1o1	PF3D7_1229300	conserved Plasmodium protein, unknown function	3647.166667	1623.666667
S01 044	34	M	PFL1415w.1o1	PF3D7_1229300	conserved Plasmodium protein, unknown function	-944.333333	-2546.666667
S01 045	68	M	PFL1415w.1o1	PF3D7_1229300	conserved Plasmodium protein, unknown function	-247.5	755.5
S01 046	56	M	PFL1415w.1o1	PF3D7_1229300	conserved Plasmodium protein, unknown function	209.666667	410.5
S01 047	58	M	PFL1415w.1o1	PF3D7_1229300	conserved Plasmodium protein, unknown function	4714.166667	2243.333333
S01 048	35	M	PFL1415w.1o1	PF3D7_1229300	conserved Plasmodium protein, unknown function	122.166667	-110.833333
S01 049	59	M	PFL1415w.1o1	PF3D7_1229300	conserved Plasmodium protein, unknown function	479.833333	1530.166667
S01 050	31	M	PFL1415w.1o1	PF3D7_1229300	conserved Plasmodium protein, unknown function	7713.333333	2083.5
S01 051	23	F	PFL1415w.1o1	PF3D7_1229300	conserved Plasmodium protein, unknown function	9993.333333	2659.5
S01 052	2	F	PFL1415w.1o1	PF3D7_1229300	conserved Plasmodium protein, unknown function	1318.166667	-973.333333
S01 053	68	M	PFL1415w.1o1	PF3D7_1229300	conserved Plasmodium protein, unknown function	575.333333	319.333333
S01 054	73	M	PFL1415w.1o1	PF3D7_1229300	conserved Plasmodium protein, unknown function	1045.5	-110.5
S01 055	41	F	PFL1415w.1o1	PF3D7_1229300	conserved Plasmodium protein, unknown function	11768.33333	2659.666667
S01 056	56	F	PFL1415w.1o1	PF3D7_1229300	conserved Plasmodium protein, unknown function	82.333333	363.166667
S01 057	37	F	PFL1415w.1o1	PF3D7_1229300	conserved Plasmodium protein, unknown function	13394	10599.33333
S01 058	48	F	PFL1415w.1o1	PF3D7_1229300	conserved Plasmodium protein, unknown function	2253.833333	-608.5
S01 059	27	F	PFL1415w.1o1	PF3D7_1229300	conserved Plasmodium protein, unknown function	2009	-1485.166667
S01 060	16	F	PFL1415w.1o1	PF3D7_1229300	conserved Plasmodium protein, unknown function	2322	-550.666667
S01 061	47	F	PFL1415w.1o1	PF3D7_1229300	conserved Plasmodium protein, unknown function	1111.5	-1158.666667
S01 062	14	M	PFL1415w.1o1	PF3D7_1229300	conserved Plasmodium protein, unknown function	-432.666667	-2224.833333
S01 063	32	F	PFL1415w.1o1	PF3D7_1229300	conserved Plasmodium protein, unknown function	929.666667	-1010.833333
S01 064	31	F	PFL1415w.1o1	PF3D7_1229300	conserved Plasmodium protein, unknown function	1071.833333	16.833333
S01 065	15	F	PFL1415w.1o1	PF3D7_1229300	conserved Plasmodium protein, unknown function	551.666667	-1786
S01 066	60	F	PFL1415w.1o1	PF3D7_1229300	conserved Plasmodium protein, unknown function	11350.33333	1940.833333
S01 067	25	F	PFL1415w.1o1	PF3D7_1229300	conserved Plasmodium protein, unknown function	1902	-1287
S01 068	54	M	PFL1415w.1o1	PF3D7_1229300	conserved Plasmodium protein, unknown function	11144.16667	5598.833333
S01 069	38	F	PFL1415w.1o1	PF3D7_1229300	conserved Plasmodium protein, unknown function	1732.166667	416.666667
S01 070	30	F	PFL1415w.1o1	PF3D7_1229300	conserved Plasmodium protein, unknown function	2821.5	-235
S01 071	37	F	PFL1415w.1o1	PF3D7_1229300	conserved Plasmodium protein, unknown function	1070.166667	-1105.333333
S01 072	36	M	PFL1415w.1o1	PF3D7_1229300	conserved Plasmodium protein, unknown function	8112.333333	1917.166667
S01 073	48	M	PFL1415w.1o1	PF3D7_1229300	conserved Plasmodium protein, unknown function	2362.5	76.166667
S01 074	28	F	PFL1415w.1o1	PF3D7_1229300	conserved Plasmodium protein, unknown function	-419	234.166667
S01 075	56	F	PFL1415w.1o1	PF3D7_1229300	conserved Plasmodium protein, unknown function	1446.5	-693.666667
S01 076	28	F	PFL1415w.1o1	PF3D7_1229300	conserved Plasmodium protein, unknown function	600	-449.666667
S01 077	64	F	PFL1415w.1o1	PF3D7_1229300	conserved Plasmodium protein, unknown function	1533.5	-31.833333
S01 078	65	F	PFL1415w.1o1	PF3D7_1229300	conserved Plasmodium protein, unknown function	6562.5	630
S01 079	12	M	PFL1415w.1o1	PF3D7_1229300	conserved Plasmodium protein, unknown function	-490.333333	-456.5
S01 080	41	M	PFL1415w.1o1	PF3D7_1229300	conserved Plasmodium protein, unknown function	1012.333333	689.5
S01 081	8	M	PFL1415w.1o1	PF3D7_1229300	conserved Plasmodium protein, unknown function	605.5	146.333333
S01 082	7	M	PFL1415w.1o1	PF3D7_1229300	conserved Plasmodium protein, unknown function	-139	-287
S01 083	7	M	PFL1415w.1o1	PF3D7_1229300	conserved Plasmodium protein, unknown function	-18.166667	417.333333
S01 084	7	M	PFL1415w.1o1	PF3D7_1229300	conserved Plasmodium protein, unknown function	517.833333	45.666667
S01 085	7	M	PFL1415w.1o1	PF3D7_1229300	conserved Plasmodium protein, unknown function	-260.5	664.5
S01 086	8	F	PFL1415w.1o1	PF3D7_1229300	conserved Plasmodium protein, unknown function	4699	-414.333333
S01 087	7	F	PFL1415w.1o1	PF3D7_1229300	conserved Plasmodium protein, unknown function	1462.5	585.5
S01 088	8	M	PFL1415w.1o1	PF3D7_1229300	conserved Plasmodium protein, unknown function	956.666667	53.833333
S01 089	11	M	PFL1415w.1o1	PF3D7_1229300	conserved Plasmodium protein, unknown function	13552	887.666667
S01 090	9	M	PFL1415w.1o1	PF3D7_1229300	conserved Plasmodium protein, unknown function	80	268.166667
S01 091	8	M	PFL1415w.1o1	PF3D7_1229300	conserved Plasmodium protein, unknown function	-2622.166667	-1329.166667
S01 092	8	F	PFL1415w.1o1	PF3D7_1229300	conserved Plasmodium protein, unknown function	3529.166667	271
S01 093	9	F	PFL1415w.1o1	PF3D7_1229300	conserved Plasmodium protein, unknown function	1496.333333	-434.333333
S01 094	8	F	PFL1415w.1o1	PF3D7_1229300	conserved Plasmodium protein, unknown function	-929	-2968.5
S01 095	12	M	PFL1415w.1o1	PF3D7_1229300	conserved Plasmodium protein, unknown function	436.166667	-553.666667
S01 096	12	F	PFL1415w.1o1	PF3D7_1229300	conserved Plasmodium protein, unknown function	-829	-3316.666667
S01 097	12	F	PFL1415w.1o1	PF3D7_1229300	conserved Plasmodium protein, unknown function	-588.166667	-383.666667
S01 098	10	F	PFL1415w.1o1	PF3D7_1229300	conserved Plasmodium protein, unknown function	-884	-2150.5
S01 099	11	F	PFL1415w.1o1	PF3D7_1229300	conserved Plasmodium protein, unknown function	-160	1504
S01 100	10	F	PFL1415w.1o1	PF3D7_1229300	conserved Plasmodium protein, unknown function	-119.5	552.833333
S01 001	84	F	PF11_0037e2s1	PF3D7_1102500	Plasmodium exported protein (PHISTb), unknown function	1254.166667	1466
S01 002	54	F	PF11_0037e2s1	PF3D7_1102500	Plasmodium exported protein (PHISTb), unknown function	-3870.166667	-440.166667
S01 003	50	F	PF11_0037e2s1	PF3D7_1102500	Plasmodium exported protein (PHISTb), unknown function	21.333333	46
S01 004	24	F	PF11_0037e2s1	PF3D7_1102500	Plasmodium exported protein (PHISTb), unknown function	-2061.833333	362.5
S01 005	14	M	PF11_0037e2s1	PF3D7_1102500	Plasmodium exported protein (PHISTb), unknown function	1417.5	621.833333
S01 006	13	M	PF11_0037e2s1	PF3D7_1102500	Plasmodium exported protein (PHISTb), unknown function	-685.5	650
S01 007	65	F	PF11_0037e2s1	PF3D7_1102500	Plasmodium exported protein (PHISTb), unknown function	7251.833333	823.166667
S01 008	70	F	PF11_0037e2s1	PF3D7_1102500	Plasmodium exported protein (PHISTb), unknown function	36.666667	628.5
S01 009	45	M	PF11_0037e2s1	PF3D7_1102500	Plasmodium exported protein (PHISTb), unknown function	3178.166667	1847.5
S01 010	2	M	PF11_0037e2s1	PF3D7_1102500	Plasmodium exported protein (PHISTb), unknown function	430	-39.833333
S01 011	68	F	PF11_0037e2s1	PF3D7_1102500	Plasmodium exported protein (PHISTb), unknown function	102.666667	58.833333
S01 012	66	F	PF11_0037e2s1	PF3D7_1102500	Plasmodium exported protein (PHISTb), unknown function	4395.666667	1223.666667
S01 013	69	F	PF11_0037e2s1	PF3D7_1102500	Plasmodium exported protein (PHISTb), unknown function	-1671.666667	589.166667
S01 014	45	F	PF11_0037e2s1	PF3D7_1102500	Plasmodium exported protein (PHISTb), unknown function	1635	-279.333333
S01 015	3	M	PF11_0037e2s1	PF3D7_1102500	Plasmodium exported protein (PHISTb), unknown function	-473.166667	-374.5
S01 016	32	F	PF11_0037e2s1	PF3D7_1102500	Plasmodium exported protein (PHISTb), unknown function	-1396.666667	279.333333
S01 017	57	F	PF11_0037e2s1	PF3D7_1102500	Plasmodium exported protein (PHISTb), unknown function	-1036.166667	494.166667
S01 018	2	F	PF11_0037e2s1	PF3D7_1102500	Plasmodium exported protein (PHISTb), unknown function	2379.833333	1025.333333
S01 019	10	F	PF11_0037e2s1	PF3D7_1102500	Plasmodium exported protein (PHISTb), unknown function	-2138.166667	-1261.833333
S01 020	68	F	PF11_0037e2s1	PF3D7_1102500	Plasmodium exported protein (PHISTb), unknown function	-1914	475.833333
S01 021	17	F	PF11_0037e2s1	PF3D7_1102500	Plasmodium exported protein (PHISTb), unknown function	-997	1175.833333
S01 022	56	F	PF11_0037e2s1	PF3D7_1102500	Plasmodium exported protein (PHISTb), unknown function	1564.833333	405.333333
S01 023	20	M	PF11_0037e2s1	PF3D7_1102500	Plasmodium exported protein (PHISTb), unknown function	205.833333	-1774.833333
S01 024	15	M	PF11_0037e2s1	PF3D7_1102500	Plasmodium exported protein (PHISTb), unknown function	48.333333	377.5
S01 025	68	F	PF11_0037e2s1	PF3D7_1102500	Plasmodium exported protein (PHISTb), unknown function	4275.833333	690
S01 026	13	F	PF11_0037e2s1	PF3D7_1102500	Plasmodium exported protein (PHISTb), unknown function	387.333333	84.833333
S01 027	54	F	PF11_0037e2s1	PF3D7_1102500	Plasmodium exported protein (PHISTb), unknown function	555	1683.333333
S01 028	19	F	PF11_0037e2s1	PF3D7_1102500	Plasmodium exported protein (PHISTb), unknown function	110.333333	-452.5
S01 029	67	F	PF11_0037e2s1	PF3D7_1102500	Plasmodium exported protein (PHISTb), unknown function	-443	1583.666667
S01 030	59	F	PF11_0037e2s1	PF3D7_1102500	Plasmodium exported protein (PHISTb), unknown function	516.166667	979.833333
S01 031	68	M	PF11_0037e2s1	PF3D7_1102500	Plasmodium exported protein (PHISTb), unknown function	2512.333333	-2686.333333
S01 032	63	M	PF11_0037e2s1	PF3D7_1102500	Plasmodium exported protein (PHISTb), unknown function	3759.833333	-3747
S01 033	39	F	PF11_0037e2s1	PF3D7_1102500	Plasmodium exported protein (PHISTb), unknown function	337.5	1096.833333
S01 034	36	F	PF11_0037e2s1	PF3D7_1102500	Plasmodium exported protein (PHISTb), unknown function	1885.333333	-471.5
S01 035	31	F	PF11_0037e2s1	PF3D7_1102500	Plasmodium exported protein (PHISTb), unknown function	1162.333333	3480.333333
S01 036	63	F	PF11_0037e2s1	PF3D7_1102500	Plasmodium exported protein (PHISTb), unknown function	-1581	-953.333333
S01 037	48	F	PF11_0037e2s1	PF3D7_1102500	Plasmodium exported protein (PHISTb), unknown function	1042.166667	515.5
S01 038	68	F	PF11_0037e2s1	PF3D7_1102500	Plasmodium exported protein (PHISTb), unknown function	-1526.166667	-24.833333
S01 039	52	F	PF11_0037e2s1	PF3D7_1102500	Plasmodium exported protein (PHISTb), unknown function	-640.5	-253.833333
S01 040	35	F	PF11_0037e2s1	PF3D7_1102500	Plasmodium exported protein (PHISTb), unknown function	743	227.333333
S01 041	55	F	PF11_0037e2s1	PF3D7_1102500	Plasmodium exported protein (PHISTb), unknown function	-100.333333	-531.166667
S01 042	44	F	PF11_0037e2s1	PF3D7_1102500	Plasmodium exported protein (PHISTb), unknown function	851.666667	-657.166667
S01 043	69	F	PF11_0037e2s1	PF3D7_1102500	Plasmodium exported protein (PHISTb), unknown function	-262.833333	2617.666667
S01 044	34	M	PF11_0037e2s1	PF3D7_1102500	Plasmodium exported protein (PHISTb), unknown function	925.666667	281.333333
S01 045	68	M	PF11_0037e2s1	PF3D7_1102500	Plasmodium exported protein (PHISTb), unknown function	4829.5	2448.5
S01 046	56	M	PF11_0037e2s1	PF3D7_1102500	Plasmodium exported protein (PHISTb), unknown function	15081.66667	4253.5
S01 047	58	M	PF11_0037e2s1	PF3D7_1102500	Plasmodium exported protein (PHISTb), unknown function	5472.166667	373.333333
S01 048	35	M	PF11_0037e2s1	PF3D7_1102500	Plasmodium exported protein (PHISTb), unknown function	-657.833333	-2592.833333
S01 049	59	M	PF11_0037e2s1	PF3D7_1102500	Plasmodium exported protein (PHISTb), unknown function	742.833333	433.166667
S01 050	31	M	PF11_0037e2s1	PF3D7_1102500	Plasmodium exported protein (PHISTb), unknown function	6060.333333	3258.5
S01 051	23	F	PF11_0037e2s1	PF3D7_1102500	Plasmodium exported protein (PHISTb), unknown function	2045.333333	1258.5
S01 052	2	F	PF11_0037e2s1	PF3D7_1102500	Plasmodium exported protein (PHISTb), unknown function	2711.166667	397.666667
S01 053	68	M	PF11_0037e2s1	PF3D7_1102500	Plasmodium exported protein (PHISTb), unknown function	1132.333333	639.333333
S01 054	73	M	PF11_0037e2s1	PF3D7_1102500	Plasmodium exported protein (PHISTb), unknown function	6343.5	953.5
S01 055	41	F	PF11_0037e2s1	PF3D7_1102500	Plasmodium exported protein (PHISTb), unknown function	469.333333	-103.333333
S01 056	56	F	PF11_0037e2s1	PF3D7_1102500	Plasmodium exported protein (PHISTb), unknown function	154.333333	66.166667
S01 057	37	F	PF11_0037e2s1	PF3D7_1102500	Plasmodium exported protein (PHISTb), unknown function	-373	220.333333
S01 058	48	F	PF11_0037e2s1	PF3D7_1102500	Plasmodium exported protein (PHISTb), unknown function	1324.833333	-330.5
S01 059	27	F	PF11_0037e2s1	PF3D7_1102500	Plasmodium exported protein (PHISTb), unknown function	472	-240.166667
S01 060	16	F	PF11_0037e2s1	PF3D7_1102500	Plasmodium exported protein (PHISTb), unknown function	2062	109.333333
S01 061	47	F	PF11_0037e2s1	PF3D7_1102500	Plasmodium exported protein (PHISTb), unknown function	3719.5	-1188.666667
S01 062	14	M	PF11_0037e2s1	PF3D7_1102500	Plasmodium exported protein (PHISTb), unknown function	101.333333	-866.833333
S01 063	32	F	PF11_0037e2s1	PF3D7_1102500	Plasmodium exported protein (PHISTb), unknown function	118.666667	-707.833333
S01 064	31	F	PF11_0037e2s1	PF3D7_1102500	Plasmodium exported protein (PHISTb), unknown function	192.833333	-365.166667
S01 065	15	F	PF11_0037e2s1	PF3D7_1102500	Plasmodium exported protein (PHISTb), unknown function	946.666667	1017
S01 066	60	F	PF11_0037e2s1	PF3D7_1102500	Plasmodium exported protein (PHISTb), unknown function	554.333333	-999.166667
S01 067	25	F	PF11_0037e2s1	PF3D7_1102500	Plasmodium exported protein (PHISTb), unknown function	287	67
S01 068	54	M	PF11_0037e2s1	PF3D7_1102500	Plasmodium exported protein (PHISTb), unknown function	3467.166667	850.833333
S01 069	38	F	PF11_0037e2s1	PF3D7_1102500	Plasmodium exported protein (PHISTb), unknown function	1136.166667	456.666667
S01 070	30	F	PF11_0037e2s1	PF3D7_1102500	Plasmodium exported protein (PHISTb), unknown function	3356.5	1788
S01 071	37	F	PF11_0037e2s1	PF3D7_1102500	Plasmodium exported protein (PHISTb), unknown function	2244.166667	1295.666667
S01 072	36	M	PF11_0037e2s1	PF3D7_1102500	Plasmodium exported protein (PHISTb), unknown function	7005.333333	3267.166667
S01 073	48	M	PF11_0037e2s1	PF3D7_1102500	Plasmodium exported protein (PHISTb), unknown function	112.5	27.166667
S01 074	28	F	PF11_0037e2s1	PF3D7_1102500	Plasmodium exported protein (PHISTb), unknown function	691	827.166667
S01 075	56	F	PF11_0037e2s1	PF3D7_1102500	Plasmodium exported protein (PHISTb), unknown function	7.5	726.333333
S01 076	28	F	PF11_0037e2s1	PF3D7_1102500	Plasmodium exported protein (PHISTb), unknown function	2710	263.333333
S01 077	64	F	PF11_0037e2s1	PF3D7_1102500	Plasmodium exported protein (PHISTb), unknown function	1349.5	-527.833333
S01 078	65	F	PF11_0037e2s1	PF3D7_1102500	Plasmodium exported protein (PHISTb), unknown function	5431.5	738
S01 079	12	M	PF11_0037e2s1	PF3D7_1102500	Plasmodium exported protein (PHISTb), unknown function	804.666667	252.5
S01 080	41	M	PF11_0037e2s1	PF3D7_1102500	Plasmodium exported protein (PHISTb), unknown function	1226.333333	254.5
S01 081	8	M	PF11_0037e2s1	PF3D7_1102500	Plasmodium exported protein (PHISTb), unknown function	646.5	-102.666667
S01 082	7	M	PF11_0037e2s1	PF3D7_1102500	Plasmodium exported protein (PHISTb), unknown function	606	238
S01 083	7	M	PF11_0037e2s1	PF3D7_1102500	Plasmodium exported protein (PHISTb), unknown function	-89.166667	1553.333333
S01 084	7	M	PF11_0037e2s1	PF3D7_1102500	Plasmodium exported protein (PHISTb), unknown function	542.833333	-344.333333
S01 085	7	M	PF11_0037e2s1	PF3D7_1102500	Plasmodium exported protein (PHISTb), unknown function	434.5	1204.5
S01 086	8	F	PF11_0037e2s1	PF3D7_1102500	Plasmodium exported protein (PHISTb), unknown function	5124	1211.666667
S01 087	7	F	PF11_0037e2s1	PF3D7_1102500	Plasmodium exported protein (PHISTb), unknown function	381.5	-176.5
S01 088	8	M	PF11_0037e2s1	PF3D7_1102500	Plasmodium exported protein (PHISTb), unknown function	620.666667	1209.833333
S01 089	11	M	PF11_0037e2s1	PF3D7_1102500	Plasmodium exported protein (PHISTb), unknown function	1245	-308.333333
S01 090	9	M	PF11_0037e2s1	PF3D7_1102500	Plasmodium exported protein (PHISTb), unknown function	2766	-83.833333
S01 091	8	M	PF11_0037e2s1	PF3D7_1102500	Plasmodium exported protein (PHISTb), unknown function	-51.166667	2411.833333
S01 092	8	F	PF11_0037e2s1	PF3D7_1102500	Plasmodium exported protein (PHISTb), unknown function	189.166667	-369
S01 093	9	F	PF11_0037e2s1	PF3D7_1102500	Plasmodium exported protein (PHISTb), unknown function	710.333333	51.666667
S01 094	8	F	PF11_0037e2s1	PF3D7_1102500	Plasmodium exported protein (PHISTb), unknown function	526	-316.5
S01 095	12	M	PF11_0037e2s1	PF3D7_1102500	Plasmodium exported protein (PHISTb), unknown function	80.166667	-1061.666667
S01 096	12	F	PF11_0037e2s1	PF3D7_1102500	Plasmodium exported protein (PHISTb), unknown function	7600	1224.333333
S01 097	12	F	PF11_0037e2s1	PF3D7_1102500	Plasmodium exported protein (PHISTb), unknown function	1251.833333	895.333333
S01 098	10	F	PF11_0037e2s1	PF3D7_1102500	Plasmodium exported protein (PHISTb), unknown function	-1014	-1076.5
S01 099	11	F	PF11_0037e2s1	PF3D7_1102500	Plasmodium exported protein (PHISTb), unknown function	1892	846
S01 100	10	F	PF11_0037e2s1	PF3D7_1102500	Plasmodium exported protein (PHISTb), unknown function	64.5	1427.833333
S01 001	84	F	PF13_0274_1o3	PF3D7_1352800	vacuolar fusion protein MON1, putative	2161.166667	1268
S01 002	54	F	PF13_0274_1o3	PF3D7_1352800	vacuolar fusion protein MON1, putative	-874.166667	-506.166667
S01 003	50	F	PF13_0274_1o3	PF3D7_1352800	vacuolar fusion protein MON1, putative	-271.666667	-17
S01 004	24	F	PF13_0274_1o3	PF3D7_1352800	vacuolar fusion protein MON1, putative	1590.166667	-93.5
S01 005	14	M	PF13_0274_1o3	PF3D7_1352800	vacuolar fusion protein MON1, putative	769.5	-86.166667
S01 006	13	M	PF13_0274_1o3	PF3D7_1352800	vacuolar fusion protein MON1, putative	-483.5	-40
S01 007	65	F	PF13_0274_1o3	PF3D7_1352800	vacuolar fusion protein MON1, putative	5406.833333	388.166667
S01 008	70	F	PF13_0274_1o3	PF3D7_1352800	vacuolar fusion protein MON1, putative	-3804.333333	-72.5
S01 009	45	M	PF13_0274_1o3	PF3D7_1352800	vacuolar fusion protein MON1, putative	3185.166667	252.5
S01 010	2	M	PF13_0274_1o3	PF3D7_1352800	vacuolar fusion protein MON1, putative	-2533	25.166667
S01 011	68	F	PF13_0274_1o3	PF3D7_1352800	vacuolar fusion protein MON1, putative	-149.333333	614.833333
S01 012	66	F	PF13_0274_1o3	PF3D7_1352800	vacuolar fusion protein MON1, putative	-295.333333	105.666667
S01 013	69	F	PF13_0274_1o3	PF3D7_1352800	vacuolar fusion protein MON1, putative	-2658.666667	209.166667
S01 014	45	F	PF13_0274_1o3	PF3D7_1352800	vacuolar fusion protein MON1, putative	-1171	-1105.333333
S01 015	3	M	PF13_0274_1o3	PF3D7_1352800	vacuolar fusion protein MON1, putative	-337.166667	-695.5
S01 016	32	F	PF13_0274_1o3	PF3D7_1352800	vacuolar fusion protein MON1, putative	727.333333	413.333333
S01 017	57	F	PF13_0274_1o3	PF3D7_1352800	vacuolar fusion protein MON1, putative	851.833333	344.166667
S01 018	2	F	PF13_0274_1o3	PF3D7_1352800	vacuolar fusion protein MON1, putative	-831.166667	-224.666667
S01 019	10	F	PF13_0274_1o3	PF3D7_1352800	vacuolar fusion protein MON1, putative	-73.166667	-441.833333
S01 020	68	F	PF13_0274_1o3	PF3D7_1352800	vacuolar fusion protein MON1, putative	5442	2163.833333
S01 021	17	F	PF13_0274_1o3	PF3D7_1352800	vacuolar fusion protein MON1, putative	-1338	-262.166667
S01 022	56	F	PF13_0274_1o3	PF3D7_1352800	vacuolar fusion protein MON1, putative	1599.833333	96.333333
S01 023	20	M	PF13_0274_1o3	PF3D7_1352800	vacuolar fusion protein MON1, putative	33.833333	-1628.833333
S01 024	15	M	PF13_0274_1o3	PF3D7_1352800	vacuolar fusion protein MON1, putative	-12.666667	128.5
S01 025	68	F	PF13_0274_1o3	PF3D7_1352800	vacuolar fusion protein MON1, putative	-144.166667	-207
S01 026	13	F	PF13_0274_1o3	PF3D7_1352800	vacuolar fusion protein MON1, putative	56.333333	478.833333
S01 027	54	F	PF13_0274_1o3	PF3D7_1352800	vacuolar fusion protein MON1, putative	1237	-361.666667
S01 028	19	F	PF13_0274_1o3	PF3D7_1352800	vacuolar fusion protein MON1, putative	-513.666667	490.5
S01 029	67	F	PF13_0274_1o3	PF3D7_1352800	vacuolar fusion protein MON1, putative	11927	4889.666667
S01 030	59	F	PF13_0274_1o3	PF3D7_1352800	vacuolar fusion protein MON1, putative	2507.166667	-658.166667
S01 031	68	M	PF13_0274_1o3	PF3D7_1352800	vacuolar fusion protein MON1, putative	2093.333333	-2398.333333
S01 032	63	M	PF13_0274_1o3	PF3D7_1352800	vacuolar fusion protein MON1, putative	5601.833333	1006
S01 033	39	F	PF13_0274_1o3	PF3D7_1352800	vacuolar fusion protein MON1, putative	-230.5	586.833333
S01 034	36	F	PF13_0274_1o3	PF3D7_1352800	vacuolar fusion protein MON1, putative	1426.333333	-349.5
S01 035	31	F	PF13_0274_1o3	PF3D7_1352800	vacuolar fusion protein MON1, putative	1099.333333	447.333333
S01 036	63	F	PF13_0274_1o3	PF3D7_1352800	vacuolar fusion protein MON1, putative	779	-1005.333333
S01 037	48	F	PF13_0274_1o3	PF3D7_1352800	vacuolar fusion protein MON1, putative	1020.166667	-573.5
S01 038	68	F	PF13_0274_1o3	PF3D7_1352800	vacuolar fusion protein MON1, putative	805.833333	723.166667
S01 039	52	F	PF13_0274_1o3	PF3D7_1352800	vacuolar fusion protein MON1, putative	3331.5	12.166667
S01 040	35	F	PF13_0274_1o3	PF3D7_1352800	vacuolar fusion protein MON1, putative	1559	190.333333
S01 041	55	F	PF13_0274_1o3	PF3D7_1352800	vacuolar fusion protein MON1, putative	-35.333333	-54.166667
S01 042	44	F	PF13_0274_1o3	PF3D7_1352800	vacuolar fusion protein MON1, putative	765.666667	-272.166667
S01 043	69	F	PF13_0274_1o3	PF3D7_1352800	vacuolar fusion protein MON1, putative	-1772.833333	745.666667
S01 044	34	M	PF13_0274_1o3	PF3D7_1352800	vacuolar fusion protein MON1, putative	589.666667	371.333333
S01 045	68	M	PF13_0274_1o3	PF3D7_1352800	vacuolar fusion protein MON1, putative	625.5	1487.5
S01 046	56	M	PF13_0274_1o3	PF3D7_1352800	vacuolar fusion protein MON1, putative	-129.333333	220.5
S01 047	58	M	PF13_0274_1o3	PF3D7_1352800	vacuolar fusion protein MON1, putative	3158.166667	821.333333
S01 048	35	M	PF13_0274_1o3	PF3D7_1352800	vacuolar fusion protein MON1, putative	-432.833333	-946.833333
S01 049	59	M	PF13_0274_1o3	PF3D7_1352800	vacuolar fusion protein MON1, putative	-650.166667	427.166667
S01 050	31	M	PF13_0274_1o3	PF3D7_1352800	vacuolar fusion protein MON1, putative	8584.333333	5881.5
S01 051	23	F	PF13_0274_1o3	PF3D7_1352800	vacuolar fusion protein MON1, putative	160.333333	-482.5
S01 052	2	F	PF13_0274_1o3	PF3D7_1352800	vacuolar fusion protein MON1, putative	230.166667	388.666667
S01 053	68	M	PF13_0274_1o3	PF3D7_1352800	vacuolar fusion protein MON1, putative	369.333333	-185.666667
S01 054	73	M	PF13_0274_1o3	PF3D7_1352800	vacuolar fusion protein MON1, putative	2046.5	211.5
S01 055	41	F	PF13_0274_1o3	PF3D7_1352800	vacuolar fusion protein MON1, putative	159.333333	-426.333333
S01 056	56	F	PF13_0274_1o3	PF3D7_1352800	vacuolar fusion protein MON1, putative	-95.666667	-568.833333
S01 057	37	F	PF13_0274_1o3	PF3D7_1352800	vacuolar fusion protein MON1, putative	6366	2664.333333
S01 058	48	F	PF13_0274_1o3	PF3D7_1352800	vacuolar fusion protein MON1, putative	873.833333	-692.5
S01 059	27	F	PF13_0274_1o3	PF3D7_1352800	vacuolar fusion protein MON1, putative	-16	-40.166667
S01 060	16	F	PF13_0274_1o3	PF3D7_1352800	vacuolar fusion protein MON1, putative	588	-1064.666667
S01 061	47	F	PF13_0274_1o3	PF3D7_1352800	vacuolar fusion protein MON1, putative	519.5	-1610.666667
S01 062	14	M	PF13_0274_1o3	PF3D7_1352800	vacuolar fusion protein MON1, putative	202.333333	-1756.833333
S01 063	32	F	PF13_0274_1o3	PF3D7_1352800	vacuolar fusion protein MON1, putative	-270.333333	-1406.833333
S01 064	31	F	PF13_0274_1o3	PF3D7_1352800	vacuolar fusion protein MON1, putative	511.833333	-355.166667
S01 065	15	F	PF13_0274_1o3	PF3D7_1352800	vacuolar fusion protein MON1, putative	928.666667	-192
S01 066	60	F	PF13_0274_1o3	PF3D7_1352800	vacuolar fusion protein MON1, putative	435.333333	-926.166667
S01 067	25	F	PF13_0274_1o3	PF3D7_1352800	vacuolar fusion protein MON1, putative	222	-1073
S01 068	54	M	PF13_0274_1o3	PF3D7_1352800	vacuolar fusion protein MON1, putative	2907.166667	523.833333
S01 069	38	F	PF13_0274_1o3	PF3D7_1352800	vacuolar fusion protein MON1, putative	1415.166667	-294.333333
S01 070	30	F	PF13_0274_1o3	PF3D7_1352800	vacuolar fusion protein MON1, putative	2486.5	888
S01 071	37	F	PF13_0274_1o3	PF3D7_1352800	vacuolar fusion protein MON1, putative	-335.833333	673.666667
S01 072	36	M	PF13_0274_1o3	PF3D7_1352800	vacuolar fusion protein MON1, putative	4601.333333	751.166667
S01 073	48	M	PF13_0274_1o3	PF3D7_1352800	vacuolar fusion protein MON1, putative	162.5	-422.833333
S01 074	28	F	PF13_0274_1o3	PF3D7_1352800	vacuolar fusion protein MON1, putative	-778	1252.166667
S01 075	56	F	PF13_0274_1o3	PF3D7_1352800	vacuolar fusion protein MON1, putative	-666.5	-161.666667
S01 076	28	F	PF13_0274_1o3	PF3D7_1352800	vacuolar fusion protein MON1, putative	573	363.333333
S01 077	64	F	PF13_0274_1o3	PF3D7_1352800	vacuolar fusion protein MON1, putative	1528.5	-849.833333
S01 078	65	F	PF13_0274_1o3	PF3D7_1352800	vacuolar fusion protein MON1, putative	6201.5	171
S01 079	12	M	PF13_0274_1o3	PF3D7_1352800	vacuolar fusion protein MON1, putative	-715.333333	423.5
S01 080	41	M	PF13_0274_1o3	PF3D7_1352800	vacuolar fusion protein MON1, putative	1731.333333	284.5
S01 081	8	M	PF13_0274_1o3	PF3D7_1352800	vacuolar fusion protein MON1, putative	356.5	-309.666667
S01 082	7	M	PF13_0274_1o3	PF3D7_1352800	vacuolar fusion protein MON1, putative	167	386
S01 083	7	M	PF13_0274_1o3	PF3D7_1352800	vacuolar fusion protein MON1, putative	-1211.166667	641.333333
S01 084	7	M	PF13_0274_1o3	PF3D7_1352800	vacuolar fusion protein MON1, putative	1107.833333	-46.333333
S01 085	7	M	PF13_0274_1o3	PF3D7_1352800	vacuolar fusion protein MON1, putative	503.5	-23.5
S01 086	8	F	PF13_0274_1o3	PF3D7_1352800	vacuolar fusion protein MON1, putative	5029	1122.666667
S01 087	7	F	PF13_0274_1o3	PF3D7_1352800	vacuolar fusion protein MON1, putative	-323.5	-711.5
S01 088	8	M	PF13_0274_1o3	PF3D7_1352800	vacuolar fusion protein MON1, putative	891.666667	364.833333
S01 089	11	M	PF13_0274_1o3	PF3D7_1352800	vacuolar fusion protein MON1, putative	2467	-1371.333333
S01 090	9	M	PF13_0274_1o3	PF3D7_1352800	vacuolar fusion protein MON1, putative	19	-835.833333
S01 091	8	M	PF13_0274_1o3	PF3D7_1352800	vacuolar fusion protein MON1, putative	-2833.166667	766.833333
S01 092	8	F	PF13_0274_1o3	PF3D7_1352800	vacuolar fusion protein MON1, putative	1567.166667	314
S01 093	9	F	PF13_0274_1o3	PF3D7_1352800	vacuolar fusion protein MON1, putative	-154.666667	-725.333333
S01 094	8	F	PF13_0274_1o3	PF3D7_1352800	vacuolar fusion protein MON1, putative	252	-884.5
S01 095	12	M	PF13_0274_1o3	PF3D7_1352800	vacuolar fusion protein MON1, putative	12.166667	-1021.666667
S01 096	12	F	PF13_0274_1o3	PF3D7_1352800	vacuolar fusion protein MON1, putative	210	-3285.666667
S01 097	12	F	PF13_0274_1o3	PF3D7_1352800	vacuolar fusion protein MON1, putative	-416.166667	696.333333
S01 098	10	F	PF13_0274_1o3	PF3D7_1352800	vacuolar fusion protein MON1, putative	-1695	-190.5
S01 099	11	F	PF13_0274_1o3	PF3D7_1352800	vacuolar fusion protein MON1, putative	865	-315
S01 100	10	F	PF13_0274_1o3	PF3D7_1352800	vacuolar fusion protein MON1, putative	1639.5	-12.166667
S01 001	84	F	PFL1055c.1o1	PF3D7_1221900	conserved Plasmodium membrane protein, unknown function	3788.166667	1243
S01 002	54	F	PFL1055c.1o1	PF3D7_1221900	conserved Plasmodium membrane protein, unknown function	1662.833333	-595.166667
S01 003	50	F	PFL1055c.1o1	PF3D7_1221900	conserved Plasmodium membrane protein, unknown function	574.333333	703
S01 004	24	F	PFL1055c.1o1	PF3D7_1221900	conserved Plasmodium membrane protein, unknown function	2188.166667	326.5
S01 005	14	M	PFL1055c.1o1	PF3D7_1221900	conserved Plasmodium membrane protein, unknown function	1662.5	731.833333
S01 006	13	M	PFL1055c.1o1	PF3D7_1221900	conserved Plasmodium membrane protein, unknown function	482.5	-139
S01 007	65	F	PFL1055c.1o1	PF3D7_1221900	conserved Plasmodium membrane protein, unknown function	5007.833333	1587.166667
S01 008	70	F	PFL1055c.1o1	PF3D7_1221900	conserved Plasmodium membrane protein, unknown function	63.666667	914.5
S01 009	45	M	PFL1055c.1o1	PF3D7_1221900	conserved Plasmodium membrane protein, unknown function	3342.166667	1327.5
S01 010	2	M	PFL1055c.1o1	PF3D7_1221900	conserved Plasmodium membrane protein, unknown function	-3573	153.166667
S01 011	68	F	PFL1055c.1o1	PF3D7_1221900	conserved Plasmodium membrane protein, unknown function	-1293.333333	563.833333
S01 012	66	F	PFL1055c.1o1	PF3D7_1221900	conserved Plasmodium membrane protein, unknown function	-656.333333	242.666667
S01 013	69	F	PFL1055c.1o1	PF3D7_1221900	conserved Plasmodium membrane protein, unknown function	-6321.666667	579.166667
S01 014	45	F	PFL1055c.1o1	PF3D7_1221900	conserved Plasmodium membrane protein, unknown function	-1544	-13.333333
S01 015	3	M	PFL1055c.1o1	PF3D7_1221900	conserved Plasmodium membrane protein, unknown function	878.833333	285.5
S01 016	32	F	PFL1055c.1o1	PF3D7_1221900	conserved Plasmodium membrane protein, unknown function	1530.333333	1512.333333
S01 017	57	F	PFL1055c.1o1	PF3D7_1221900	conserved Plasmodium membrane protein, unknown function	1968.833333	852.166667
S01 018	2	F	PFL1055c.1o1	PF3D7_1221900	conserved Plasmodium membrane protein, unknown function	-410.166667	591.333333
S01 019	10	F	PFL1055c.1o1	PF3D7_1221900	conserved Plasmodium membrane protein, unknown function	1498.833333	-1394.833333
S01 020	68	F	PFL1055c.1o1	PF3D7_1221900	conserved Plasmodium membrane protein, unknown function	2830	2236.833333
S01 021	17	F	PFL1055c.1o1	PF3D7_1221900	conserved Plasmodium membrane protein, unknown function	-695	2221.833333
S01 022	56	F	PFL1055c.1o1	PF3D7_1221900	conserved Plasmodium membrane protein, unknown function	318.833333	156.333333
S01 023	20	M	PFL1055c.1o1	PF3D7_1221900	conserved Plasmodium membrane protein, unknown function	2705.833333	-941.833333
S01 024	15	M	PFL1055c.1o1	PF3D7_1221900	conserved Plasmodium membrane protein, unknown function	874.333333	825.5
S01 025	68	F	PFL1055c.1o1	PF3D7_1221900	conserved Plasmodium membrane protein, unknown function	11536.83333	2235
S01 026	13	F	PFL1055c.1o1	PF3D7_1221900	conserved Plasmodium membrane protein, unknown function	610.333333	107.833333
S01 027	54	F	PFL1055c.1o1	PF3D7_1221900	conserved Plasmodium membrane protein, unknown function	491	-1921.666667
S01 028	19	F	PFL1055c.1o1	PF3D7_1221900	conserved Plasmodium membrane protein, unknown function	1432.333333	524.5
S01 029	67	F	PFL1055c.1o1	PF3D7_1221900	conserved Plasmodium membrane protein, unknown function	10783	2517.666667
S01 030	59	F	PFL1055c.1o1	PF3D7_1221900	conserved Plasmodium membrane protein, unknown function	806.166667	-924.166667
S01 031	68	M	PFL1055c.1o1	PF3D7_1221900	conserved Plasmodium membrane protein, unknown function	4218.333333	-1545.333333
S01 032	63	M	PFL1055c.1o1	PF3D7_1221900	conserved Plasmodium membrane protein, unknown function	4727.833333	-1528
S01 033	39	F	PFL1055c.1o1	PF3D7_1221900	conserved Plasmodium membrane protein, unknown function	182.5	750.833333
S01 034	36	F	PFL1055c.1o1	PF3D7_1221900	conserved Plasmodium membrane protein, unknown function	4854.333333	121.5
S01 035	31	F	PFL1055c.1o1	PF3D7_1221900	conserved Plasmodium membrane protein, unknown function	319.333333	1072.333333
S01 036	63	F	PFL1055c.1o1	PF3D7_1221900	conserved Plasmodium membrane protein, unknown function	2727	570.666667
S01 037	48	F	PFL1055c.1o1	PF3D7_1221900	conserved Plasmodium membrane protein, unknown function	441.166667	-331.5
S01 038	68	F	PFL1055c.1o1	PF3D7_1221900	conserved Plasmodium membrane protein, unknown function	-620.166667	342.166667
S01 039	52	F	PFL1055c.1o1	PF3D7_1221900	conserved Plasmodium membrane protein, unknown function	7838.5	1238.166667
S01 040	35	F	PFL1055c.1o1	PF3D7_1221900	conserved Plasmodium membrane protein, unknown function	-932	-2784.666667
S01 041	55	F	PFL1055c.1o1	PF3D7_1221900	conserved Plasmodium membrane protein, unknown function	571.666667	-112.166667
S01 042	44	F	PFL1055c.1o1	PF3D7_1221900	conserved Plasmodium membrane protein, unknown function	1980.666667	-784.166667
S01 043	69	F	PFL1055c.1o1	PF3D7_1221900	conserved Plasmodium membrane protein, unknown function	-565.833333	1329.666667
S01 044	34	M	PFL1055c.1o1	PF3D7_1221900	conserved Plasmodium membrane protein, unknown function	908.666667	-683.666667
S01 045	68	M	PFL1055c.1o1	PF3D7_1221900	conserved Plasmodium membrane protein, unknown function	1257.5	1867.5
S01 046	56	M	PFL1055c.1o1	PF3D7_1221900	conserved Plasmodium membrane protein, unknown function	280.666667	214.5
S01 047	58	M	PFL1055c.1o1	PF3D7_1221900	conserved Plasmodium membrane protein, unknown function	7253.166667	1163.333333
S01 048	35	M	PFL1055c.1o1	PF3D7_1221900	conserved Plasmodium membrane protein, unknown function	511.166667	-489.833333
S01 049	59	M	PFL1055c.1o1	PF3D7_1221900	conserved Plasmodium membrane protein, unknown function	614.833333	692.166667
S01 050	31	M	PFL1055c.1o1	PF3D7_1221900	conserved Plasmodium membrane protein, unknown function	833.333333	2340.5
S01 051	23	F	PFL1055c.1o1	PF3D7_1221900	conserved Plasmodium membrane protein, unknown function	1460.333333	-294.5
S01 052	2	F	PFL1055c.1o1	PF3D7_1221900	conserved Plasmodium membrane protein, unknown function	367.166667	-15.333333
S01 053	68	M	PFL1055c.1o1	PF3D7_1221900	conserved Plasmodium membrane protein, unknown function	1540.333333	-1391.666667
S01 054	73	M	PFL1055c.1o1	PF3D7_1221900	conserved Plasmodium membrane protein, unknown function	1651.5	565.5
S01 055	41	F	PFL1055c.1o1	PF3D7_1221900	conserved Plasmodium membrane protein, unknown function	3092.333333	891.666667
S01 056	56	F	PFL1055c.1o1	PF3D7_1221900	conserved Plasmodium membrane protein, unknown function	2988.333333	1014.166667
S01 057	37	F	PFL1055c.1o1	PF3D7_1221900	conserved Plasmodium membrane protein, unknown function	12719	8038.333333
S01 058	48	F	PFL1055c.1o1	PF3D7_1221900	conserved Plasmodium membrane protein, unknown function	339.833333	177.5
S01 059	27	F	PFL1055c.1o1	PF3D7_1221900	conserved Plasmodium membrane protein, unknown function	184	69.833333
S01 060	16	F	PFL1055c.1o1	PF3D7_1221900	conserved Plasmodium membrane protein, unknown function	3	379.333333
S01 061	47	F	PFL1055c.1o1	PF3D7_1221900	conserved Plasmodium membrane protein, unknown function	467.5	-282.666667
S01 062	14	M	PFL1055c.1o1	PF3D7_1221900	conserved Plasmodium membrane protein, unknown function	777.333333	-734.833333
S01 063	32	F	PFL1055c.1o1	PF3D7_1221900	conserved Plasmodium membrane protein, unknown function	1051.666667	182.166667
S01 064	31	F	PFL1055c.1o1	PF3D7_1221900	conserved Plasmodium membrane protein, unknown function	2852.833333	637.833333
S01 065	15	F	PFL1055c.1o1	PF3D7_1221900	conserved Plasmodium membrane protein, unknown function	149.666667	-1197
S01 066	60	F	PFL1055c.1o1	PF3D7_1221900	conserved Plasmodium membrane protein, unknown function	2417.333333	-130.166667
S01 067	25	F	PFL1055c.1o1	PF3D7_1221900	conserved Plasmodium membrane protein, unknown function	839	-1809
S01 068	54	M	PFL1055c.1o1	PF3D7_1221900	conserved Plasmodium membrane protein, unknown function	3672.166667	777.833333
S01 069	38	F	PFL1055c.1o1	PF3D7_1221900	conserved Plasmodium membrane protein, unknown function	1562.166667	-1153.333333
S01 070	30	F	PFL1055c.1o1	PF3D7_1221900	conserved Plasmodium membrane protein, unknown function	2691.5	32
S01 071	37	F	PFL1055c.1o1	PF3D7_1221900	conserved Plasmodium membrane protein, unknown function	4495.166667	-452.333333
S01 072	36	M	PFL1055c.1o1	PF3D7_1221900	conserved Plasmodium membrane protein, unknown function	3193.333333	709.166667
S01 073	48	M	PFL1055c.1o1	PF3D7_1221900	conserved Plasmodium membrane protein, unknown function	939.5	-326.833333
S01 074	28	F	PFL1055c.1o1	PF3D7_1221900	conserved Plasmodium membrane protein, unknown function	1559	14.166667
S01 075	56	F	PFL1055c.1o1	PF3D7_1221900	conserved Plasmodium membrane protein, unknown function	806.5	-511.666667
S01 076	28	F	PFL1055c.1o1	PF3D7_1221900	conserved Plasmodium membrane protein, unknown function	390	-873.666667
S01 077	64	F	PFL1055c.1o1	PF3D7_1221900	conserved Plasmodium membrane protein, unknown function	1521.5	-850.833333
S01 078	65	F	PFL1055c.1o1	PF3D7_1221900	conserved Plasmodium membrane protein, unknown function	6147.5	728
S01 079	12	M	PFL1055c.1o1	PF3D7_1221900	conserved Plasmodium membrane protein, unknown function	1889.666667	-745.5
S01 080	41	M	PFL1055c.1o1	PF3D7_1221900	conserved Plasmodium membrane protein, unknown function	2417.333333	594.5
S01 081	8	M	PFL1055c.1o1	PF3D7_1221900	conserved Plasmodium membrane protein, unknown function	177.5	-559.666667
S01 082	7	M	PFL1055c.1o1	PF3D7_1221900	conserved Plasmodium membrane protein, unknown function	1080	-502
S01 083	7	M	PFL1055c.1o1	PF3D7_1221900	conserved Plasmodium membrane protein, unknown function	1007.833333	-330.666667
S01 084	7	M	PFL1055c.1o1	PF3D7_1221900	conserved Plasmodium membrane protein, unknown function	396.833333	683.666667
S01 085	7	M	PFL1055c.1o1	PF3D7_1221900	conserved Plasmodium membrane protein, unknown function	337.5	78.5
S01 086	8	F	PFL1055c.1o1	PF3D7_1221900	conserved Plasmodium membrane protein, unknown function	6437	230.666667
S01 087	7	F	PFL1055c.1o1	PF3D7_1221900	conserved Plasmodium membrane protein, unknown function	604.5	25.5
S01 088	8	M	PFL1055c.1o1	PF3D7_1221900	conserved Plasmodium membrane protein, unknown function	1226.666667	823.833333
S01 089	11	M	PFL1055c.1o1	PF3D7_1221900	conserved Plasmodium membrane protein, unknown function	1201	-976.333333
S01 090	9	M	PFL1055c.1o1	PF3D7_1221900	conserved Plasmodium membrane protein, unknown function	1821	465.166667
S01 091	8	M	PFL1055c.1o1	PF3D7_1221900	conserved Plasmodium membrane protein, unknown function	1611.833333	320.833333
S01 092	8	F	PFL1055c.1o1	PF3D7_1221900	conserved Plasmodium membrane protein, unknown function	749.166667	-113
S01 093	9	F	PFL1055c.1o1	PF3D7_1221900	conserved Plasmodium membrane protein, unknown function	1349.333333	-467.333333
S01 094	8	F	PFL1055c.1o1	PF3D7_1221900	conserved Plasmodium membrane protein, unknown function	469	-417.5
S01 095	12	M	PFL1055c.1o1	PF3D7_1221900	conserved Plasmodium membrane protein, unknown function	1531.166667	338.333333
S01 096	12	F	PFL1055c.1o1	PF3D7_1221900	conserved Plasmodium membrane protein, unknown function	2445	1073.333333
S01 097	12	F	PFL1055c.1o1	PF3D7_1221900	conserved Plasmodium membrane protein, unknown function	3022.833333	820.333333
S01 098	10	F	PFL1055c.1o1	PF3D7_1221900	conserved Plasmodium membrane protein, unknown function	660	-614.5
S01 099	11	F	PFL1055c.1o1	PF3D7_1221900	conserved Plasmodium membrane protein, unknown function	3953	1832
S01 100	10	F	PFL1055c.1o1	PF3D7_1221900	conserved Plasmodium membrane protein, unknown function	1511.5	-139.166667
S01 001	84	F	PFF0845c-s4	PF3D7_0617400	erythrocyte membrane protein 1, PfEMP1	5923.166667	1259
S01 002	54	F	PFF0845c-s4	PF3D7_0617400	erythrocyte membrane protein 1, PfEMP1	167.833333	369.833333
S01 003	50	F	PFF0845c-s4	PF3D7_0617400	erythrocyte membrane protein 1, PfEMP1	-735.666667	761
S01 004	24	F	PFF0845c-s4	PF3D7_0617400	erythrocyte membrane protein 1, PfEMP1	5579.166667	271.5
S01 005	14	M	PFF0845c-s4	PF3D7_0617400	erythrocyte membrane protein 1, PfEMP1	1711.5	859.833333
S01 006	13	M	PFF0845c-s4	PF3D7_0617400	erythrocyte membrane protein 1, PfEMP1	15.5	971
S01 007	65	F	PFF0845c-s4	PF3D7_0617400	erythrocyte membrane protein 1, PfEMP1	9433.833333	2663.166667
S01 008	70	F	PFF0845c-s4	PF3D7_0617400	erythrocyte membrane protein 1, PfEMP1	1525.666667	353.5
S01 009	45	M	PFF0845c-s4	PF3D7_0617400	erythrocyte membrane protein 1, PfEMP1	2613.166667	1605.5
S01 010	2	M	PFF0845c-s4	PF3D7_0617400	erythrocyte membrane protein 1, PfEMP1	-1376	957.166667
S01 011	68	F	PFF0845c-s4	PF3D7_0617400	erythrocyte membrane protein 1, PfEMP1	-403.333333	551.833333
S01 012	66	F	PFF0845c-s4	PF3D7_0617400	erythrocyte membrane protein 1, PfEMP1	1741.666667	620.666667
S01 013	69	F	PFF0845c-s4	PF3D7_0617400	erythrocyte membrane protein 1, PfEMP1	-2946.666667	51.166667
S01 014	45	F	PFF0845c-s4	PF3D7_0617400	erythrocyte membrane protein 1, PfEMP1	3883	253.666667
S01 015	3	M	PFF0845c-s4	PF3D7_0617400	erythrocyte membrane protein 1, PfEMP1	-1295.166667	7.5
S01 016	32	F	PFF0845c-s4	PF3D7_0617400	erythrocyte membrane protein 1, PfEMP1	1882.333333	911.333333
S01 017	57	F	PFF0845c-s4	PF3D7_0617400	erythrocyte membrane protein 1, PfEMP1	1685.833333	889.166667
S01 018	2	F	PFF0845c-s4	PF3D7_0617400	erythrocyte membrane protein 1, PfEMP1	-528.166667	-144.666667
S01 019	10	F	PFF0845c-s4	PF3D7_0617400	erythrocyte membrane protein 1, PfEMP1	683.833333	-763.833333
S01 020	68	F	PFF0845c-s4	PF3D7_0617400	erythrocyte membrane protein 1, PfEMP1	560	1016.833333
S01 021	17	F	PFF0845c-s4	PF3D7_0617400	erythrocyte membrane protein 1, PfEMP1	-1699	493.833333
S01 022	56	F	PFF0845c-s4	PF3D7_0617400	erythrocyte membrane protein 1, PfEMP1	178.833333	916.333333
S01 023	20	M	PFF0845c-s4	PF3D7_0617400	erythrocyte membrane protein 1, PfEMP1	1772.833333	-2570.833333
S01 024	15	M	PFF0845c-s4	PF3D7_0617400	erythrocyte membrane protein 1, PfEMP1	1115.333333	608.5
S01 025	68	F	PFF0845c-s4	PF3D7_0617400	erythrocyte membrane protein 1, PfEMP1	149.833333	257
S01 026	13	F	PFF0845c-s4	PF3D7_0617400	erythrocyte membrane protein 1, PfEMP1	422.333333	-475.166667
S01 027	54	F	PFF0845c-s4	PF3D7_0617400	erythrocyte membrane protein 1, PfEMP1	-259	-973.666667
S01 028	19	F	PFF0845c-s4	PF3D7_0617400	erythrocyte membrane protein 1, PfEMP1	739.333333	-407.5
S01 029	67	F	PFF0845c-s4	PF3D7_0617400	erythrocyte membrane protein 1, PfEMP1	11245	3316.666667
S01 030	59	F	PFF0845c-s4	PF3D7_0617400	erythrocyte membrane protein 1, PfEMP1	1260.166667	-487.166667
S01 031	68	M	PFF0845c-s4	PF3D7_0617400	erythrocyte membrane protein 1, PfEMP1	6771.333333	-1812.333333
S01 032	63	M	PFF0845c-s4	PF3D7_0617400	erythrocyte membrane protein 1, PfEMP1	7349.833333	-1379
S01 033	39	F	PFF0845c-s4	PF3D7_0617400	erythrocyte membrane protein 1, PfEMP1	844.5	1224.833333
S01 034	36	F	PFF0845c-s4	PF3D7_0617400	erythrocyte membrane protein 1, PfEMP1	3183.333333	-32.5
S01 035	31	F	PFF0845c-s4	PF3D7_0617400	erythrocyte membrane protein 1, PfEMP1	2478.333333	918.333333
S01 036	63	F	PFF0845c-s4	PF3D7_0617400	erythrocyte membrane protein 1, PfEMP1	970	1041.666667
S01 037	48	F	PFF0845c-s4	PF3D7_0617400	erythrocyte membrane protein 1, PfEMP1	1571.166667	-95.5
S01 038	68	F	PFF0845c-s4	PF3D7_0617400	erythrocyte membrane protein 1, PfEMP1	983.833333	555.166667
S01 039	52	F	PFF0845c-s4	PF3D7_0617400	erythrocyte membrane protein 1, PfEMP1	8748.5	343.166667
S01 040	35	F	PFF0845c-s4	PF3D7_0617400	erythrocyte membrane protein 1, PfEMP1	788	-1242.666667
S01 041	55	F	PFF0845c-s4	PF3D7_0617400	erythrocyte membrane protein 1, PfEMP1	1149.666667	-690.166667
S01 042	44	F	PFF0845c-s4	PF3D7_0617400	erythrocyte membrane protein 1, PfEMP1	1520.666667	-1411.166667
S01 043	69	F	PFF0845c-s4	PF3D7_0617400	erythrocyte membrane protein 1, PfEMP1	339.166667	231.666667
S01 044	34	M	PFF0845c-s4	PF3D7_0617400	erythrocyte membrane protein 1, PfEMP1	3097.666667	-43.666667
S01 045	68	M	PFF0845c-s4	PF3D7_0617400	erythrocyte membrane protein 1, PfEMP1	3594.5	1293.5
S01 046	56	M	PFF0845c-s4	PF3D7_0617400	erythrocyte membrane protein 1, PfEMP1	794.666667	-643.5
S01 047	58	M	PFF0845c-s4	PF3D7_0617400	erythrocyte membrane protein 1, PfEMP1	9611.166667	527.333333
S01 048	35	M	PFF0845c-s4	PF3D7_0617400	erythrocyte membrane protein 1, PfEMP1	-68.833333	-503.833333
S01 049	59	M	PFF0845c-s4	PF3D7_0617400	erythrocyte membrane protein 1, PfEMP1	1659.833333	409.166667
S01 050	31	M	PFF0845c-s4	PF3D7_0617400	erythrocyte membrane protein 1, PfEMP1	5469.333333	335.5
S01 051	23	F	PFF0845c-s4	PF3D7_0617400	erythrocyte membrane protein 1, PfEMP1	1692.333333	-134.5
S01 052	2	F	PFF0845c-s4	PF3D7_0617400	erythrocyte membrane protein 1, PfEMP1	448.166667	-1118.333333
S01 053	68	M	PFF0845c-s4	PF3D7_0617400	erythrocyte membrane protein 1, PfEMP1	-122.666667	-1214.666667
S01 054	73	M	PFF0845c-s4	PF3D7_0617400	erythrocyte membrane protein 1, PfEMP1	2409.5	713.5
S01 055	41	F	PFF0845c-s4	PF3D7_0617400	erythrocyte membrane protein 1, PfEMP1	1354.333333	394.666667
S01 056	56	F	PFF0845c-s4	PF3D7_0617400	erythrocyte membrane protein 1, PfEMP1	2291.333333	622.166667
S01 057	37	F	PFF0845c-s4	PF3D7_0617400	erythrocyte membrane protein 1, PfEMP1	4283	-169.666667
S01 058	48	F	PFF0845c-s4	PF3D7_0617400	erythrocyte membrane protein 1, PfEMP1	3724.833333	-666.5
S01 059	27	F	PFF0845c-s4	PF3D7_0617400	erythrocyte membrane protein 1, PfEMP1	2131	-1556.166667
S01 060	16	F	PFF0845c-s4	PF3D7_0617400	erythrocyte membrane protein 1, PfEMP1	3349	197.333333
S01 061	47	F	PFF0845c-s4	PF3D7_0617400	erythrocyte membrane protein 1, PfEMP1	3386.5	1881.333333
S01 062	14	M	PFF0845c-s4	PF3D7_0617400	erythrocyte membrane protein 1, PfEMP1	1917.333333	-844.833333
S01 063	32	F	PFF0845c-s4	PF3D7_0617400	erythrocyte membrane protein 1, PfEMP1	1912.666667	254.166667
S01 064	31	F	PFF0845c-s4	PF3D7_0617400	erythrocyte membrane protein 1, PfEMP1	1174.833333	323.833333
S01 065	15	F	PFF0845c-s4	PF3D7_0617400	erythrocyte membrane protein 1, PfEMP1	12.666667	-1068
S01 066	60	F	PFF0845c-s4	PF3D7_0617400	erythrocyte membrane protein 1, PfEMP1	190.333333	-124.166667
S01 067	25	F	PFF0845c-s4	PF3D7_0617400	erythrocyte membrane protein 1, PfEMP1	-83	-1715
S01 068	54	M	PFF0845c-s4	PF3D7_0617400	erythrocyte membrane protein 1, PfEMP1	1777.166667	812.833333
S01 069	38	F	PFF0845c-s4	PF3D7_0617400	erythrocyte membrane protein 1, PfEMP1	7151.166667	-1715.333333
S01 070	30	F	PFF0845c-s4	PF3D7_0617400	erythrocyte membrane protein 1, PfEMP1	2502.5	689
S01 071	37	F	PFF0845c-s4	PF3D7_0617400	erythrocyte membrane protein 1, PfEMP1	3098.166667	1392.666667
S01 072	36	M	PFF0845c-s4	PF3D7_0617400	erythrocyte membrane protein 1, PfEMP1	9655.333333	1297.166667
S01 073	48	M	PFF0845c-s4	PF3D7_0617400	erythrocyte membrane protein 1, PfEMP1	796.5	-969.833333
S01 074	28	F	PFF0845c-s4	PF3D7_0617400	erythrocyte membrane protein 1, PfEMP1	-484	-1893.833333
S01 075	56	F	PFF0845c-s4	PF3D7_0617400	erythrocyte membrane protein 1, PfEMP1	3888.5	-847.666667
S01 076	28	F	PFF0845c-s4	PF3D7_0617400	erythrocyte membrane protein 1, PfEMP1	656	-653.666667
S01 077	64	F	PFF0845c-s4	PF3D7_0617400	erythrocyte membrane protein 1, PfEMP1	1011.5	-101.833333
S01 078	65	F	PFF0845c-s4	PF3D7_0617400	erythrocyte membrane protein 1, PfEMP1	6755.5	2376
S01 079	12	M	PFF0845c-s4	PF3D7_0617400	erythrocyte membrane protein 1, PfEMP1	905.666667	301.5
S01 080	41	M	PFF0845c-s4	PF3D7_0617400	erythrocyte membrane protein 1, PfEMP1	2108.333333	1513.5
S01 081	8	M	PFF0845c-s4	PF3D7_0617400	erythrocyte membrane protein 1, PfEMP1	496.5	-849.666667
S01 082	7	M	PFF0845c-s4	PF3D7_0617400	erythrocyte membrane protein 1, PfEMP1	-94	-834
S01 083	7	M	PFF0845c-s4	PF3D7_0617400	erythrocyte membrane protein 1, PfEMP1	562.833333	-819.666667
S01 084	7	M	PFF0845c-s4	PF3D7_0617400	erythrocyte membrane protein 1, PfEMP1	246.833333	1368.666667
S01 085	7	M	PFF0845c-s4	PF3D7_0617400	erythrocyte membrane protein 1, PfEMP1	-165.5	-323.5
S01 086	8	F	PFF0845c-s4	PF3D7_0617400	erythrocyte membrane protein 1, PfEMP1	5900	-442.333333
S01 087	7	F	PFF0845c-s4	PF3D7_0617400	erythrocyte membrane protein 1, PfEMP1	395.5	-41.5
S01 088	8	M	PFF0845c-s4	PF3D7_0617400	erythrocyte membrane protein 1, PfEMP1	1314.666667	147.833333
S01 089	11	M	PFF0845c-s4	PF3D7_0617400	erythrocyte membrane protein 1, PfEMP1	2551	-554.333333
S01 090	9	M	PFF0845c-s4	PF3D7_0617400	erythrocyte membrane protein 1, PfEMP1	922	-357.833333
S01 091	8	M	PFF0845c-s4	PF3D7_0617400	erythrocyte membrane protein 1, PfEMP1	2629.833333	1099.833333
S01 092	8	F	PFF0845c-s4	PF3D7_0617400	erythrocyte membrane protein 1, PfEMP1	585.166667	-335
S01 093	9	F	PFF0845c-s4	PF3D7_0617400	erythrocyte membrane protein 1, PfEMP1	1344.333333	-1012.333333
S01 094	8	F	PFF0845c-s4	PF3D7_0617400	erythrocyte membrane protein 1, PfEMP1	1130	-235.5
S01 095	12	M	PFF0845c-s4	PF3D7_0617400	erythrocyte membrane protein 1, PfEMP1	669.166667	-191.666667
S01 096	12	F	PFF0845c-s4	PF3D7_0617400	erythrocyte membrane protein 1, PfEMP1	1655	520.333333
S01 097	12	F	PFF0845c-s4	PF3D7_0617400	erythrocyte membrane protein 1, PfEMP1	1433.833333	1003.333333
S01 098	10	F	PFF0845c-s4	PF3D7_0617400	erythrocyte membrane protein 1, PfEMP1	492	383.5
S01 099	11	F	PFF0845c-s4	PF3D7_0617400	erythrocyte membrane protein 1, PfEMP1	4587	2030
S01 100	10	F	PFF0845c-s4	PF3D7_0617400	erythrocyte membrane protein 1, PfEMP1	2556.5	202.833333
S01 001	84	F	PF13_0319.1o1	PF3D7_1360400	conserved Plasmodium protein, unknown function	1204.166667	1553
S01 002	54	F	PF13_0319.1o1	PF3D7_1360400	conserved Plasmodium protein, unknown function	1186.833333	-102.166667
S01 003	50	F	PF13_0319.1o1	PF3D7_1360400	conserved Plasmodium protein, unknown function	126.333333	230
S01 004	24	F	PF13_0319.1o1	PF3D7_1360400	conserved Plasmodium protein, unknown function	2675.166667	-27.5
S01 005	14	M	PF13_0319.1o1	PF3D7_1360400	conserved Plasmodium protein, unknown function	1377.5	74.833333
S01 006	13	M	PF13_0319.1o1	PF3D7_1360400	conserved Plasmodium protein, unknown function	1370.5	530
S01 007	65	F	PF13_0319.1o1	PF3D7_1360400	conserved Plasmodium protein, unknown function	8352.833333	1308.166667
S01 008	70	F	PF13_0319.1o1	PF3D7_1360400	conserved Plasmodium protein, unknown function	964.666667	131.5
S01 009	45	M	PF13_0319.1o1	PF3D7_1360400	conserved Plasmodium protein, unknown function	4213.166667	1892.5
S01 010	2	M	PF13_0319.1o1	PF3D7_1360400	conserved Plasmodium protein, unknown function	866	694.166667
S01 011	68	F	PF13_0319.1o1	PF3D7_1360400	conserved Plasmodium protein, unknown function	674.666667	863.833333
S01 012	66	F	PF13_0319.1o1	PF3D7_1360400	conserved Plasmodium protein, unknown function	5185.666667	625.666667
S01 013	69	F	PF13_0319.1o1	PF3D7_1360400	conserved Plasmodium protein, unknown function	-695.666667	441.166667
S01 014	45	F	PF13_0319.1o1	PF3D7_1360400	conserved Plasmodium protein, unknown function	-62	511.666667
S01 015	3	M	PF13_0319.1o1	PF3D7_1360400	conserved Plasmodium protein, unknown function	-1797.166667	38.5
S01 016	32	F	PF13_0319.1o1	PF3D7_1360400	conserved Plasmodium protein, unknown function	4714.333333	1333.333333
S01 017	57	F	PF13_0319.1o1	PF3D7_1360400	conserved Plasmodium protein, unknown function	893.833333	411.166667
S01 018	2	F	PF13_0319.1o1	PF3D7_1360400	conserved Plasmodium protein, unknown function	58.833333	513.333333
S01 019	10	F	PF13_0319.1o1	PF3D7_1360400	conserved Plasmodium protein, unknown function	-34.166667	-155.833333
S01 020	68	F	PF13_0319.1o1	PF3D7_1360400	conserved Plasmodium protein, unknown function	1371	1110.833333
S01 021	17	F	PF13_0319.1o1	PF3D7_1360400	conserved Plasmodium protein, unknown function	-920	219.833333
S01 022	56	F	PF13_0319.1o1	PF3D7_1360400	conserved Plasmodium protein, unknown function	5939.833333	638.333333
S01 023	20	M	PF13_0319.1o1	PF3D7_1360400	conserved Plasmodium protein, unknown function	1930.833333	-1298.833333
S01 024	15	M	PF13_0319.1o1	PF3D7_1360400	conserved Plasmodium protein, unknown function	566.333333	66.5
S01 025	68	F	PF13_0319.1o1	PF3D7_1360400	conserved Plasmodium protein, unknown function	2583.833333	152
S01 026	13	F	PF13_0319.1o1	PF3D7_1360400	conserved Plasmodium protein, unknown function	3042.333333	-469.166667
S01 027	54	F	PF13_0319.1o1	PF3D7_1360400	conserved Plasmodium protein, unknown function	-350	-936.666667
S01 028	19	F	PF13_0319.1o1	PF3D7_1360400	conserved Plasmodium protein, unknown function	1652.333333	-106.5
S01 029	67	F	PF13_0319.1o1	PF3D7_1360400	conserved Plasmodium protein, unknown function	12823	6142.666667
S01 030	59	F	PF13_0319.1o1	PF3D7_1360400	conserved Plasmodium protein, unknown function	7845.166667	1866.833333
S01 031	68	M	PF13_0319.1o1	PF3D7_1360400	conserved Plasmodium protein, unknown function	4913.333333	-1316.333333
S01 032	63	M	PF13_0319.1o1	PF3D7_1360400	conserved Plasmodium protein, unknown function	7936.833333	-1288
S01 033	39	F	PF13_0319.1o1	PF3D7_1360400	conserved Plasmodium protein, unknown function	18.5	1081.833333
S01 034	36	F	PF13_0319.1o1	PF3D7_1360400	conserved Plasmodium protein, unknown function	2849.333333	-629.5
S01 035	31	F	PF13_0319.1o1	PF3D7_1360400	conserved Plasmodium protein, unknown function	554.333333	1726.333333
S01 036	63	F	PF13_0319.1o1	PF3D7_1360400	conserved Plasmodium protein, unknown function	3864	1189.666667
S01 037	48	F	PF13_0319.1o1	PF3D7_1360400	conserved Plasmodium protein, unknown function	1497.166667	1246.5
S01 038	68	F	PF13_0319.1o1	PF3D7_1360400	conserved Plasmodium protein, unknown function	1956.833333	77.166667
S01 039	52	F	PF13_0319.1o1	PF3D7_1360400	conserved Plasmodium protein, unknown function	8842.5	233.166667
S01 040	35	F	PF13_0319.1o1	PF3D7_1360400	conserved Plasmodium protein, unknown function	1201	-165.666667
S01 041	55	F	PF13_0319.1o1	PF3D7_1360400	conserved Plasmodium protein, unknown function	1816.666667	-89.166667
S01 042	44	F	PF13_0319.1o1	PF3D7_1360400	conserved Plasmodium protein, unknown function	2384.666667	-886.166667
S01 043	69	F	PF13_0319.1o1	PF3D7_1360400	conserved Plasmodium protein, unknown function	-247.833333	3497.666667
S01 044	34	M	PF13_0319.1o1	PF3D7_1360400	conserved Plasmodium protein, unknown function	1274.666667	-759.666667
S01 045	68	M	PF13_0319.1o1	PF3D7_1360400	conserved Plasmodium protein, unknown function	7100.5	6350.5
S01 046	56	M	PF13_0319.1o1	PF3D7_1360400	conserved Plasmodium protein, unknown function	1512.666667	550.5
S01 047	58	M	PF13_0319.1o1	PF3D7_1360400	conserved Plasmodium protein, unknown function	10455.16667	1997.333333
S01 048	35	M	PF13_0319.1o1	PF3D7_1360400	conserved Plasmodium protein, unknown function	-168.833333	-801.833333
S01 049	59	M	PF13_0319.1o1	PF3D7_1360400	conserved Plasmodium protein, unknown function	-507.166667	1145.166667
S01 050	31	M	PF13_0319.1o1	PF3D7_1360400	conserved Plasmodium protein, unknown function	5997.333333	690.5
S01 051	23	F	PF13_0319.1o1	PF3D7_1360400	conserved Plasmodium protein, unknown function	834.333333	-215.5
S01 052	2	F	PF13_0319.1o1	PF3D7_1360400	conserved Plasmodium protein, unknown function	1550.166667	-116.333333
S01 053	68	M	PF13_0319.1o1	PF3D7_1360400	conserved Plasmodium protein, unknown function	326.333333	-741.666667
S01 054	73	M	PF13_0319.1o1	PF3D7_1360400	conserved Plasmodium protein, unknown function	2882.5	578.5
S01 055	41	F	PF13_0319.1o1	PF3D7_1360400	conserved Plasmodium protein, unknown function	1729.333333	252.666667
S01 056	56	F	PF13_0319.1o1	PF3D7_1360400	conserved Plasmodium protein, unknown function	-471.666667	-191.833333
S01 057	37	F	PF13_0319.1o1	PF3D7_1360400	conserved Plasmodium protein, unknown function	196	957.333333
S01 058	48	F	PF13_0319.1o1	PF3D7_1360400	conserved Plasmodium protein, unknown function	2847.833333	1.5
S01 059	27	F	PF13_0319.1o1	PF3D7_1360400	conserved Plasmodium protein, unknown function	91	-221.166667
S01 060	16	F	PF13_0319.1o1	PF3D7_1360400	conserved Plasmodium protein, unknown function	2831	-4.666667
S01 061	47	F	PF13_0319.1o1	PF3D7_1360400	conserved Plasmodium protein, unknown function	422.5	-1012.666667
S01 062	14	M	PF13_0319.1o1	PF3D7_1360400	conserved Plasmodium protein, unknown function	404.333333	-508.833333
S01 063	32	F	PF13_0319.1o1	PF3D7_1360400	conserved Plasmodium protein, unknown function	1109.666667	113.166667
S01 064	31	F	PF13_0319.1o1	PF3D7_1360400	conserved Plasmodium protein, unknown function	550.833333	361.833333
S01 065	15	F	PF13_0319.1o1	PF3D7_1360400	conserved Plasmodium protein, unknown function	478.666667	-833
S01 066	60	F	PF13_0319.1o1	PF3D7_1360400	conserved Plasmodium protein, unknown function	3353.333333	87.833333
S01 067	25	F	PF13_0319.1o1	PF3D7_1360400	conserved Plasmodium protein, unknown function	773	-2507
S01 068	54	M	PF13_0319.1o1	PF3D7_1360400	conserved Plasmodium protein, unknown function	3341.166667	265.833333
S01 069	38	F	PF13_0319.1o1	PF3D7_1360400	conserved Plasmodium protein, unknown function	9703.166667	910.666667
S01 070	30	F	PF13_0319.1o1	PF3D7_1360400	conserved Plasmodium protein, unknown function	3451.5	1148
S01 071	37	F	PF13_0319.1o1	PF3D7_1360400	conserved Plasmodium protein, unknown function	3115.166667	-766.333333
S01 072	36	M	PF13_0319.1o1	PF3D7_1360400	conserved Plasmodium protein, unknown function	1673.333333	-660.833333
S01 073	48	M	PF13_0319.1o1	PF3D7_1360400	conserved Plasmodium protein, unknown function	535.5	-449.833333
S01 074	28	F	PF13_0319.1o1	PF3D7_1360400	conserved Plasmodium protein, unknown function	2118	-1326.833333
S01 075	56	F	PF13_0319.1o1	PF3D7_1360400	conserved Plasmodium protein, unknown function	659.5	84.333333
S01 076	28	F	PF13_0319.1o1	PF3D7_1360400	conserved Plasmodium protein, unknown function	783	-1462.666667
S01 077	64	F	PF13_0319.1o1	PF3D7_1360400	conserved Plasmodium protein, unknown function	13871.5	4325.166667
S01 078	65	F	PF13_0319.1o1	PF3D7_1360400	conserved Plasmodium protein, unknown function	6758.5	2135
S01 079	12	M	PF13_0319.1o1	PF3D7_1360400	conserved Plasmodium protein, unknown function	835.666667	-537.5
S01 080	41	M	PF13_0319.1o1	PF3D7_1360400	conserved Plasmodium protein, unknown function	2115.333333	-91.5
S01 081	8	M	PF13_0319.1o1	PF3D7_1360400	conserved Plasmodium protein, unknown function	1356.5	-738.666667
S01 082	7	M	PF13_0319.1o1	PF3D7_1360400	conserved Plasmodium protein, unknown function	2480	-1098
S01 083	7	M	PF13_0319.1o1	PF3D7_1360400	conserved Plasmodium protein, unknown function	394.833333	538.333333
S01 084	7	M	PF13_0319.1o1	PF3D7_1360400	conserved Plasmodium protein, unknown function	1231.833333	412.666667
S01 085	7	M	PF13_0319.1o1	PF3D7_1360400	conserved Plasmodium protein, unknown function	14985.5	5554.5
S01 086	8	F	PF13_0319.1o1	PF3D7_1360400	conserved Plasmodium protein, unknown function	7127	770.666667
S01 087	7	F	PF13_0319.1o1	PF3D7_1360400	conserved Plasmodium protein, unknown function	169.5	-491.5
S01 088	8	M	PF13_0319.1o1	PF3D7_1360400	conserved Plasmodium protein, unknown function	1497.666667	-162.166667
S01 089	11	M	PF13_0319.1o1	PF3D7_1360400	conserved Plasmodium protein, unknown function	1979	1117.666667
S01 090	9	M	PF13_0319.1o1	PF3D7_1360400	conserved Plasmodium protein, unknown function	643	624.166667
S01 091	8	M	PF13_0319.1o1	PF3D7_1360400	conserved Plasmodium protein, unknown function	-16.166667	123.833333
S01 092	8	F	PF13_0319.1o1	PF3D7_1360400	conserved Plasmodium protein, unknown function	-107.833333	41
S01 093	9	F	PF13_0319.1o1	PF3D7_1360400	conserved Plasmodium protein, unknown function	653.333333	-280.333333
S01 094	8	F	PF13_0319.1o1	PF3D7_1360400	conserved Plasmodium protein, unknown function	538	80.5
S01 095	12	M	PF13_0319.1o1	PF3D7_1360400	conserved Plasmodium protein, unknown function	1560.166667	-186.666667
S01 096	12	F	PF13_0319.1o1	PF3D7_1360400	conserved Plasmodium protein, unknown function	-346	480.333333
S01 097	12	F	PF13_0319.1o1	PF3D7_1360400	conserved Plasmodium protein, unknown function	2709.833333	943.333333
S01 098	10	F	PF13_0319.1o1	PF3D7_1360400	conserved Plasmodium protein, unknown function	-634	-595.5
S01 099	11	F	PF13_0319.1o1	PF3D7_1360400	conserved Plasmodium protein, unknown function	8135	6295
S01 100	10	F	PF13_0319.1o1	PF3D7_1360400	conserved Plasmodium protein, unknown function	97.5	928.833333
S01 001	84	F	MAL13P1.230e1s1	PF3D7_1346000	dynactin subunit 2, putative	5610.166667	2846
S01 002	54	F	MAL13P1.230e1s1	PF3D7_1346000	dynactin subunit 2, putative	10025.83333	3650.833333
S01 003	50	F	MAL13P1.230e1s1	PF3D7_1346000	dynactin subunit 2, putative	2287.333333	677
S01 004	24	F	MAL13P1.230e1s1	PF3D7_1346000	dynactin subunit 2, putative	6678.166667	427.5
S01 005	14	M	MAL13P1.230e1s1	PF3D7_1346000	dynactin subunit 2, putative	-131.5	564.833333
S01 006	13	M	MAL13P1.230e1s1	PF3D7_1346000	dynactin subunit 2, putative	-550.5	383
S01 007	65	F	MAL13P1.230e1s1	PF3D7_1346000	dynactin subunit 2, putative	9524.833333	3774.166667
S01 008	70	F	MAL13P1.230e1s1	PF3D7_1346000	dynactin subunit 2, putative	632.666667	164.5
S01 009	45	M	MAL13P1.230e1s1	PF3D7_1346000	dynactin subunit 2, putative	4232.166667	4376.5
S01 010	2	M	MAL13P1.230e1s1	PF3D7_1346000	dynactin subunit 2, putative	-961	1135.166667
S01 011	68	F	MAL13P1.230e1s1	PF3D7_1346000	dynactin subunit 2, putative	1023.666667	915.833333
S01 012	66	F	MAL13P1.230e1s1	PF3D7_1346000	dynactin subunit 2, putative	12417.66667	6196.666667
S01 013	69	F	MAL13P1.230e1s1	PF3D7_1346000	dynactin subunit 2, putative	9697.333333	2416.166667
S01 014	45	F	MAL13P1.230e1s1	PF3D7_1346000	dynactin subunit 2, putative	2857	1768.666667
S01 015	3	M	MAL13P1.230e1s1	PF3D7_1346000	dynactin subunit 2, putative	-1169.166667	-564.5
S01 016	32	F	MAL13P1.230e1s1	PF3D7_1346000	dynactin subunit 2, putative	2489.333333	2296.333333
S01 017	57	F	MAL13P1.230e1s1	PF3D7_1346000	dynactin subunit 2, putative	10953.83333	7343.166667
S01 018	2	F	MAL13P1.230e1s1	PF3D7_1346000	dynactin subunit 2, putative	-1107.166667	-205.666667
S01 019	10	F	MAL13P1.230e1s1	PF3D7_1346000	dynactin subunit 2, putative	-442.166667	-373.833333
S01 020	68	F	MAL13P1.230e1s1	PF3D7_1346000	dynactin subunit 2, putative	5372	2876.833333
S01 021	17	F	MAL13P1.230e1s1	PF3D7_1346000	dynactin subunit 2, putative	-1019	-108.166667
S01 022	56	F	MAL13P1.230e1s1	PF3D7_1346000	dynactin subunit 2, putative	3396.833333	1260.333333
S01 023	20	M	MAL13P1.230e1s1	PF3D7_1346000	dynactin subunit 2, putative	6659.833333	-1463.833333
S01 024	15	M	MAL13P1.230e1s1	PF3D7_1346000	dynactin subunit 2, putative	6853.333333	700.5
S01 025	68	F	MAL13P1.230e1s1	PF3D7_1346000	dynactin subunit 2, putative	11304.83333	2667
S01 026	13	F	MAL13P1.230e1s1	PF3D7_1346000	dynactin subunit 2, putative	-1.666667	-1036.166667
S01 027	54	F	MAL13P1.230e1s1	PF3D7_1346000	dynactin subunit 2, putative	10673	3216.333333
S01 028	19	F	MAL13P1.230e1s1	PF3D7_1346000	dynactin subunit 2, putative	2472.333333	-222.5
S01 029	67	F	MAL13P1.230e1s1	PF3D7_1346000	dynactin subunit 2, putative	11370	4192.666667
S01 030	59	F	MAL13P1.230e1s1	PF3D7_1346000	dynactin subunit 2, putative	7309.166667	6964.833333
S01 031	68	M	MAL13P1.230e1s1	PF3D7_1346000	dynactin subunit 2, putative	6022.333333	-960.333333
S01 032	63	M	MAL13P1.230e1s1	PF3D7_1346000	dynactin subunit 2, putative	7158.833333	-564
S01 033	39	F	MAL13P1.230e1s1	PF3D7_1346000	dynactin subunit 2, putative	12937.5	3327.833333
S01 034	36	F	MAL13P1.230e1s1	PF3D7_1346000	dynactin subunit 2, putative	7243.333333	1413.5
S01 035	31	F	MAL13P1.230e1s1	PF3D7_1346000	dynactin subunit 2, putative	-267.666667	2312.333333
S01 036	63	F	MAL13P1.230e1s1	PF3D7_1346000	dynactin subunit 2, putative	-82	2175.666667
S01 037	48	F	MAL13P1.230e1s1	PF3D7_1346000	dynactin subunit 2, putative	3988.166667	2468.5
S01 038	68	F	MAL13P1.230e1s1	PF3D7_1346000	dynactin subunit 2, putative	5491.833333	4190.166667
S01 039	52	F	MAL13P1.230e1s1	PF3D7_1346000	dynactin subunit 2, putative	7766.5	-368.833333
S01 040	35	F	MAL13P1.230e1s1	PF3D7_1346000	dynactin subunit 2, putative	614	-1916.666667
S01 041	55	F	MAL13P1.230e1s1	PF3D7_1346000	dynactin subunit 2, putative	15358.66667	12623.83333
S01 042	44	F	MAL13P1.230e1s1	PF3D7_1346000	dynactin subunit 2, putative	1541.666667	-1542.166667
S01 043	69	F	MAL13P1.230e1s1	PF3D7_1346000	dynactin subunit 2, putative	-85.833333	1571.666667
S01 044	34	M	MAL13P1.230e1s1	PF3D7_1346000	dynactin subunit 2, putative	13659.66667	3955.333333
S01 045	68	M	MAL13P1.230e1s1	PF3D7_1346000	dynactin subunit 2, putative	496.5	-720.5
S01 046	56	M	MAL13P1.230e1s1	PF3D7_1346000	dynactin subunit 2, putative	704.666667	-175.5
S01 047	58	M	MAL13P1.230e1s1	PF3D7_1346000	dynactin subunit 2, putative	9503.166667	775.333333
S01 048	35	M	MAL13P1.230e1s1	PF3D7_1346000	dynactin subunit 2, putative	2232.166667	-711.833333
S01 049	59	M	MAL13P1.230e1s1	PF3D7_1346000	dynactin subunit 2, putative	9841.833333	1802.166667
S01 050	31	M	MAL13P1.230e1s1	PF3D7_1346000	dynactin subunit 2, putative	4089.333333	7445.5
S01 051	23	F	MAL13P1.230e1s1	PF3D7_1346000	dynactin subunit 2, putative	1411.333333	-155.5
S01 052	2	F	MAL13P1.230e1s1	PF3D7_1346000	dynactin subunit 2, putative	-322.833333	-113.333333
S01 053	68	M	MAL13P1.230e1s1	PF3D7_1346000	dynactin subunit 2, putative	-1190.666667	-520.666667
S01 054	73	M	MAL13P1.230e1s1	PF3D7_1346000	dynactin subunit 2, putative	4160.5	363.5
S01 055	41	F	MAL13P1.230e1s1	PF3D7_1346000	dynactin subunit 2, putative	10359.33333	3174.666667
S01 056	56	F	MAL13P1.230e1s1	PF3D7_1346000	dynactin subunit 2, putative	6723.333333	1158.166667
S01 057	37	F	MAL13P1.230e1s1	PF3D7_1346000	dynactin subunit 2, putative	13864	9843.333333
S01 058	48	F	MAL13P1.230e1s1	PF3D7_1346000	dynactin subunit 2, putative	9560.833333	1722.5
S01 059	27	F	MAL13P1.230e1s1	PF3D7_1346000	dynactin subunit 2, putative	2531	726.833333
S01 060	16	F	MAL13P1.230e1s1	PF3D7_1346000	dynactin subunit 2, putative	3806	552.333333
S01 061	47	F	MAL13P1.230e1s1	PF3D7_1346000	dynactin subunit 2, putative	12916.5	5913.333333
S01 062	14	M	MAL13P1.230e1s1	PF3D7_1346000	dynactin subunit 2, putative	440.333333	-2095.833333
S01 063	32	F	MAL13P1.230e1s1	PF3D7_1346000	dynactin subunit 2, putative	8608.666667	1978.166667
S01 064	31	F	MAL13P1.230e1s1	PF3D7_1346000	dynactin subunit 2, putative	1244.833333	2316.833333
S01 065	15	F	MAL13P1.230e1s1	PF3D7_1346000	dynactin subunit 2, putative	1073.666667	-505
S01 066	60	F	MAL13P1.230e1s1	PF3D7_1346000	dynactin subunit 2, putative	9613.333333	1635.833333
S01 067	25	F	MAL13P1.230e1s1	PF3D7_1346000	dynactin subunit 2, putative	8726	977
S01 068	54	M	MAL13P1.230e1s1	PF3D7_1346000	dynactin subunit 2, putative	10445.16667	2237.833333
S01 069	38	F	MAL13P1.230e1s1	PF3D7_1346000	dynactin subunit 2, putative	8932.166667	-1660.333333
S01 070	30	F	MAL13P1.230e1s1	PF3D7_1346000	dynactin subunit 2, putative	2775.5	1018
S01 071	37	F	MAL13P1.230e1s1	PF3D7_1346000	dynactin subunit 2, putative	2394.166667	-246.333333
S01 072	36	M	MAL13P1.230e1s1	PF3D7_1346000	dynactin subunit 2, putative	5610.333333	-195.833333
S01 073	48	M	MAL13P1.230e1s1	PF3D7_1346000	dynactin subunit 2, putative	10368.5	717.166667
S01 074	28	F	MAL13P1.230e1s1	PF3D7_1346000	dynactin subunit 2, putative	1	-1048.833333
S01 075	56	F	MAL13P1.230e1s1	PF3D7_1346000	dynactin subunit 2, putative	9878.5	2586.333333
S01 076	28	F	MAL13P1.230e1s1	PF3D7_1346000	dynactin subunit 2, putative	4514	861.333333
S01 077	64	F	MAL13P1.230e1s1	PF3D7_1346000	dynactin subunit 2, putative	7080.5	883.166667
S01 078	65	F	MAL13P1.230e1s1	PF3D7_1346000	dynactin subunit 2, putative	6843.5	4548
S01 079	12	M	MAL13P1.230e1s1	PF3D7_1346000	dynactin subunit 2, putative	314.666667	842.5
S01 080	41	M	MAL13P1.230e1s1	PF3D7_1346000	dynactin subunit 2, putative	3157.333333	484.5
S01 081	8	M	MAL13P1.230e1s1	PF3D7_1346000	dynactin subunit 2, putative	1635.5	-1063.666667
S01 082	7	M	MAL13P1.230e1s1	PF3D7_1346000	dynactin subunit 2, putative	-358	-641
S01 083	7	M	MAL13P1.230e1s1	PF3D7_1346000	dynactin subunit 2, putative	1540.833333	2.333333
S01 084	7	M	MAL13P1.230e1s1	PF3D7_1346000	dynactin subunit 2, putative	809.833333	967.666667
S01 085	7	M	MAL13P1.230e1s1	PF3D7_1346000	dynactin subunit 2, putative	1988.5	-166.5
S01 086	8	F	MAL13P1.230e1s1	PF3D7_1346000	dynactin subunit 2, putative	6420	1588.666667
S01 087	7	F	MAL13P1.230e1s1	PF3D7_1346000	dynactin subunit 2, putative	316.5	-19.5
S01 088	8	M	MAL13P1.230e1s1	PF3D7_1346000	dynactin subunit 2, putative	609.666667	131.833333
S01 089	11	M	MAL13P1.230e1s1	PF3D7_1346000	dynactin subunit 2, putative	3313	268.666667
S01 090	9	M	MAL13P1.230e1s1	PF3D7_1346000	dynactin subunit 2, putative	420	103.166667
S01 091	8	M	MAL13P1.230e1s1	PF3D7_1346000	dynactin subunit 2, putative	1513.833333	1047.833333
S01 092	8	F	MAL13P1.230e1s1	PF3D7_1346000	dynactin subunit 2, putative	5873.166667	853
S01 093	9	F	MAL13P1.230e1s1	PF3D7_1346000	dynactin subunit 2, putative	2044.333333	-1053.333333
S01 094	8	F	MAL13P1.230e1s1	PF3D7_1346000	dynactin subunit 2, putative	356	-434.5
S01 095	12	M	MAL13P1.230e1s1	PF3D7_1346000	dynactin subunit 2, putative	1404.166667	-380.666667
S01 096	12	F	MAL13P1.230e1s1	PF3D7_1346000	dynactin subunit 2, putative	1930	540.333333
S01 097	12	F	MAL13P1.230e1s1	PF3D7_1346000	dynactin subunit 2, putative	929.833333	835.333333
S01 098	10	F	MAL13P1.230e1s1	PF3D7_1346000	dynactin subunit 2, putative	777	630.5
S01 099	11	F	MAL13P1.230e1s1	PF3D7_1346000	dynactin subunit 2, putative	3385	1095
S01 100	10	F	MAL13P1.230e1s1	PF3D7_1346000	dynactin subunit 2, putative	1754.5	956.833333
S01 001	84	F	PFB0310c.1o2	PF3D7_0207000	merozoite surface protein 4	5611.166667	2401
S01 002	54	F	PFB0310c.1o2	PF3D7_0207000	merozoite surface protein 4	-717.166667	-615.166667
S01 003	50	F	PFB0310c.1o2	PF3D7_0207000	merozoite surface protein 4	7771.333333	1600
S01 004	24	F	PFB0310c.1o2	PF3D7_0207000	merozoite surface protein 4	10719.16667	12184.5
S01 005	14	M	PFB0310c.1o2	PF3D7_0207000	merozoite surface protein 4	2730.5	3327.833333
S01 006	13	M	PFB0310c.1o2	PF3D7_0207000	merozoite surface protein 4	542.5	587
S01 007	65	F	PFB0310c.1o2	PF3D7_0207000	merozoite surface protein 4	7911.833333	2961.166667
S01 008	70	F	PFB0310c.1o2	PF3D7_0207000	merozoite surface protein 4	130.666667	4285.5
S01 009	45	M	PFB0310c.1o2	PF3D7_0207000	merozoite surface protein 4	3826.166667	6227.5
S01 010	2	M	PFB0310c.1o2	PF3D7_0207000	merozoite surface protein 4	-1638	-757.833333
S01 011	68	F	PFB0310c.1o2	PF3D7_0207000	merozoite surface protein 4	11536.66667	8674.833333
S01 012	66	F	PFB0310c.1o2	PF3D7_0207000	merozoite surface protein 4	9364.666667	13702.66667
S01 013	69	F	PFB0310c.1o2	PF3D7_0207000	merozoite surface protein 4	-2133.666667	511.166667
S01 014	45	F	PFB0310c.1o2	PF3D7_0207000	merozoite surface protein 4	8398	14609.66667
S01 015	3	M	PFB0310c.1o2	PF3D7_0207000	merozoite surface protein 4	-6.166667	120.5
S01 016	32	F	PFB0310c.1o2	PF3D7_0207000	merozoite surface protein 4	6684.333333	2779.333333
S01 017	57	F	PFB0310c.1o2	PF3D7_0207000	merozoite surface protein 4	8723.833333	13818.16667
S01 018	2	F	PFB0310c.1o2	PF3D7_0207000	merozoite surface protein 4	1041.833333	456.333333
S01 019	10	F	PFB0310c.1o2	PF3D7_0207000	merozoite surface protein 4	790.833333	-375.833333
S01 020	68	F	PFB0310c.1o2	PF3D7_0207000	merozoite surface protein 4	12714	10188.83333
S01 021	17	F	PFB0310c.1o2	PF3D7_0207000	merozoite surface protein 4	-2604	334.833333
S01 022	56	F	PFB0310c.1o2	PF3D7_0207000	merozoite surface protein 4	9929.833333	12638.33333
S01 023	20	M	PFB0310c.1o2	PF3D7_0207000	merozoite surface protein 4	7628.833333	-1489.833333
S01 024	15	M	PFB0310c.1o2	PF3D7_0207000	merozoite surface protein 4	5863.333333	1933.5
S01 025	68	F	PFB0310c.1o2	PF3D7_0207000	merozoite surface protein 4	16739.83333	13176
S01 026	13	F	PFB0310c.1o2	PF3D7_0207000	merozoite surface protein 4	550.333333	-511.166667
S01 027	54	F	PFB0310c.1o2	PF3D7_0207000	merozoite surface protein 4	12763	2261.333333
S01 028	19	F	PFB0310c.1o2	PF3D7_0207000	merozoite surface protein 4	2400.333333	-274.5
S01 029	67	F	PFB0310c.1o2	PF3D7_0207000	merozoite surface protein 4	11584	3823.666667
S01 030	59	F	PFB0310c.1o2	PF3D7_0207000	merozoite surface protein 4	7253.166667	6103.833333
S01 031	68	M	PFB0310c.1o2	PF3D7_0207000	merozoite surface protein 4	3732.333333	-1458.333333
S01 032	63	M	PFB0310c.1o2	PF3D7_0207000	merozoite surface protein 4	7387.833333	-239
S01 033	39	F	PFB0310c.1o2	PF3D7_0207000	merozoite surface protein 4	12457.5	10981.83333
S01 034	36	F	PFB0310c.1o2	PF3D7_0207000	merozoite surface protein 4	11000.33333	4676.5
S01 035	31	F	PFB0310c.1o2	PF3D7_0207000	merozoite surface protein 4	5787.333333	6238.333333
S01 036	63	F	PFB0310c.1o2	PF3D7_0207000	merozoite surface protein 4	1884	746.666667
S01 037	48	F	PFB0310c.1o2	PF3D7_0207000	merozoite surface protein 4	6655.166667	6906.5
S01 038	68	F	PFB0310c.1o2	PF3D7_0207000	merozoite surface protein 4	-1979.166667	656.166667
S01 039	52	F	PFB0310c.1o2	PF3D7_0207000	merozoite surface protein 4	11211.5	8609.166667
S01 040	35	F	PFB0310c.1o2	PF3D7_0207000	merozoite surface protein 4	12566	4338.333333
S01 041	55	F	PFB0310c.1o2	PF3D7_0207000	merozoite surface protein 4	3540.666667	131.833333
S01 042	44	F	PFB0310c.1o2	PF3D7_0207000	merozoite surface protein 4	1267.666667	-43.166667
S01 043	69	F	PFB0310c.1o2	PF3D7_0207000	merozoite surface protein 4	15146.16667	6659.666667
S01 044	34	M	PFB0310c.1o2	PF3D7_0207000	merozoite surface protein 4	13535.66667	7004.333333
S01 045	68	M	PFB0310c.1o2	PF3D7_0207000	merozoite surface protein 4	1763.5	822.5
S01 046	56	M	PFB0310c.1o2	PF3D7_0207000	merozoite surface protein 4	13899.66667	5437.5
S01 047	58	M	PFB0310c.1o2	PF3D7_0207000	merozoite surface protein 4	10606.16667	2098.333333
S01 048	35	M	PFB0310c.1o2	PF3D7_0207000	merozoite surface protein 4	6943.166667	1078.166667
S01 049	59	M	PFB0310c.1o2	PF3D7_0207000	merozoite surface protein 4	11511.83333	8258.166667
S01 050	31	M	PFB0310c.1o2	PF3D7_0207000	merozoite surface protein 4	7181.333333	8593.5
S01 051	23	F	PFB0310c.1o2	PF3D7_0207000	merozoite surface protein 4	12562.33333	246.5
S01 052	2	F	PFB0310c.1o2	PF3D7_0207000	merozoite surface protein 4	710.166667	629.666667
S01 053	68	M	PFB0310c.1o2	PF3D7_0207000	merozoite surface protein 4	-574.666667	-983.666667
S01 054	73	M	PFB0310c.1o2	PF3D7_0207000	merozoite surface protein 4	10258.5	2336.5
S01 055	41	F	PFB0310c.1o2	PF3D7_0207000	merozoite surface protein 4	16178.33333	14405.66667
S01 056	56	F	PFB0310c.1o2	PF3D7_0207000	merozoite surface protein 4	14705.33333	14051.16667
S01 057	37	F	PFB0310c.1o2	PF3D7_0207000	merozoite surface protein 4	13168	10841.33333
S01 058	48	F	PFB0310c.1o2	PF3D7_0207000	merozoite surface protein 4	11254.83333	1144.5
S01 059	27	F	PFB0310c.1o2	PF3D7_0207000	merozoite surface protein 4	10507	2577.833333
S01 060	16	F	PFB0310c.1o2	PF3D7_0207000	merozoite surface protein 4	2875	367.333333
S01 061	47	F	PFB0310c.1o2	PF3D7_0207000	merozoite surface protein 4	13682.5	7050.333333
S01 062	14	M	PFB0310c.1o2	PF3D7_0207000	merozoite surface protein 4	1821.333333	435.166667
S01 063	32	F	PFB0310c.1o2	PF3D7_0207000	merozoite surface protein 4	11245.66667	2604.166667
S01 064	31	F	PFB0310c.1o2	PF3D7_0207000	merozoite surface protein 4	14690.83333	10733.83333
S01 065	15	F	PFB0310c.1o2	PF3D7_0207000	merozoite surface protein 4	2343.666667	-13
S01 066	60	F	PFB0310c.1o2	PF3D7_0207000	merozoite surface protein 4	15496.33333	5333.833333
S01 067	25	F	PFB0310c.1o2	PF3D7_0207000	merozoite surface protein 4	10012	1965
S01 068	54	M	PFB0310c.1o2	PF3D7_0207000	merozoite surface protein 4	11155.16667	11206.83333
S01 069	38	F	PFB0310c.1o2	PF3D7_0207000	merozoite surface protein 4	9066.166667	3553.666667
S01 070	30	F	PFB0310c.1o2	PF3D7_0207000	merozoite surface protein 4	4054.5	9296
S01 071	37	F	PFB0310c.1o2	PF3D7_0207000	merozoite surface protein 4	5662.166667	7159.666667
S01 072	36	M	PFB0310c.1o2	PF3D7_0207000	merozoite surface protein 4	13435.33333	9667.166667
S01 073	48	M	PFB0310c.1o2	PF3D7_0207000	merozoite surface protein 4	11514.5	7433.166667
S01 074	28	F	PFB0310c.1o2	PF3D7_0207000	merozoite surface protein 4	11416	3070.166667
S01 075	56	F	PFB0310c.1o2	PF3D7_0207000	merozoite surface protein 4	9286.5	3945.333333
S01 076	28	F	PFB0310c.1o2	PF3D7_0207000	merozoite surface protein 4	607	730.333333
S01 077	64	F	PFB0310c.1o2	PF3D7_0207000	merozoite surface protein 4	7467.5	-168.833333
S01 078	65	F	PFB0310c.1o2	PF3D7_0207000	merozoite surface protein 4	8893.5	13487
S01 079	12	M	PFB0310c.1o2	PF3D7_0207000	merozoite surface protein 4	1688.666667	-1132.5
S01 080	41	M	PFB0310c.1o2	PF3D7_0207000	merozoite surface protein 4	1784.333333	664.5
S01 081	8	M	PFB0310c.1o2	PF3D7_0207000	merozoite surface protein 4	539.5	-925.666667
S01 082	7	M	PFB0310c.1o2	PF3D7_0207000	merozoite surface protein 4	87	240
S01 083	7	M	PFB0310c.1o2	PF3D7_0207000	merozoite surface protein 4	646.833333	-162.666667
S01 084	7	M	PFB0310c.1o2	PF3D7_0207000	merozoite surface protein 4	-109.166667	-183.333333
S01 085	7	M	PFB0310c.1o2	PF3D7_0207000	merozoite surface protein 4	893.5	252.5
S01 086	8	F	PFB0310c.1o2	PF3D7_0207000	merozoite surface protein 4	6748	859.666667
S01 087	7	F	PFB0310c.1o2	PF3D7_0207000	merozoite surface protein 4	-7.5	-28.5
S01 088	8	M	PFB0310c.1o2	PF3D7_0207000	merozoite surface protein 4	661.666667	655.833333
S01 089	11	M	PFB0310c.1o2	PF3D7_0207000	merozoite surface protein 4	2950	147.666667
S01 090	9	M	PFB0310c.1o2	PF3D7_0207000	merozoite surface protein 4	29	151.166667
S01 091	8	M	PFB0310c.1o2	PF3D7_0207000	merozoite surface protein 4	607.833333	-337.166667
S01 092	8	F	PFB0310c.1o2	PF3D7_0207000	merozoite surface protein 4	380.166667	524
S01 093	9	F	PFB0310c.1o2	PF3D7_0207000	merozoite surface protein 4	1408.333333	867.666667
S01 094	8	F	PFB0310c.1o2	PF3D7_0207000	merozoite surface protein 4	-340	-432.5
S01 095	12	M	PFB0310c.1o2	PF3D7_0207000	merozoite surface protein 4	687.166667	-1493.666667
S01 096	12	F	PFB0310c.1o2	PF3D7_0207000	merozoite surface protein 4	3385	-3974.666667
S01 097	12	F	PFB0310c.1o2	PF3D7_0207000	merozoite surface protein 4	3169.833333	1003.333333
S01 098	10	F	PFB0310c.1o2	PF3D7_0207000	merozoite surface protein 4	947	-1132.5
S01 099	11	F	PFB0310c.1o2	PF3D7_0207000	merozoite surface protein 4	6281	3959
[truncated: 24,201 more rows]
